# Supplementary material
Source: Royal Society of Chemistry journal article supplement (doi:10.1039/d6md00275g)
Supplement: d6md00275g1.pdf [file d6md00275g1.pdf]

## Supplemental Information

### Novel Urea- and Piperazine-Functionalized Alepterolic Acid Derivatives: Synthesis, Anticancer Activity, and Mechanism of Action

Binbin Zhang <sup>1, #</sup>, Yating Jia <sup>1, #</sup>, Siyu Qiu <sup>2</sup>, Yanchun Sun <sup>2</sup>, Zixuan Tong <sup>2</sup>, Peixin Wang <sup>1</sup>,  
Lian Ma <sup>1</sup>, Fengjiao Wang <sup>2</sup>, Guozheng Huang <sup>2, \*</sup>, Jianguo Cao <sup>1, \*</sup>

<sup>1</sup> College of Life Sciences, Shanghai Normal University, Shanghai, 201418, PR China

<sup>2</sup> Department of Chemical Biology and Pharmaceutical Engineering, School of Chemistry and  
Chemical Engineering, Anhui University of Technology, Ma'anshan, Anhui, 243002, PR  
China

---

# These authors contributed equally to this work.

\* Corresponding authors.

Emails: [cao101@shnu.edu.cn](mailto:cao101@shnu.edu.cn) (J. Cao); [guozheng.huang@ahut.edu.cn](mailto:guozheng.huang@ahut.edu.cn) (G. Huang)

## Contents

|                                                                                                                  |    |
|------------------------------------------------------------------------------------------------------------------|----|
| General Information for Chemical Synthesis .....                                                                 | 6  |
| Detailed Information of Cell Lines Used in This Study .....                                                      | 6  |
| Cell Viability Assay.....                                                                                        | 7  |
| Cloning Assay.....                                                                                               | 7  |
| Scratch Wound Healing Assay .....                                                                                | 7  |
| Cell Proliferation Assay.....                                                                                    | 8  |
| Cell Morphology Observation Assay .....                                                                          | 8  |
| Nuclear Morphology Observation Assay .....                                                                       | 8  |
| Cell Cycle Detection Assay .....                                                                                 | 8  |
| Apoptosis Detection Assay.....                                                                                   | 9  |
| Mitochondrial Membrane Potential Detection Assay.....                                                            | 9  |
| Western blotting.....                                                                                            | 9  |
| ADMET Analysis .....                                                                                             | 9  |
| Protein Docking .....                                                                                            | 10 |
| Data Processing and Statistical Analysis .....                                                                   | 11 |
| Structural characterization of synthetic compounds.....                                                          | 11 |
| <sup>1</sup> H NMR, <sup>13</sup> C NMR, HRMS, <sup>19</sup> F NMR and HPLC spectra of synthetic compounds ..... | 22 |
| Figure S1. <sup>1</sup> H NMR spectrum of 14a.....                                                               | 23 |
| Figure S2. <sup>13</sup> C NMR spectrum of 14a.....                                                              | 23 |
| Figure S3. HRMS spectrum of 14a.....                                                                             | 24 |
| Figure S4. HPLC spectrum of 14a.....                                                                             | 24 |
| Figure S5. <sup>1</sup> H NMR spectrum of 14b.....                                                               | 25 |
| Figure S6. <sup>13</sup> C NMR spectrum of 14b .....                                                             | 25 |
| Figure S7. HRMS spectrum of 14b.....                                                                             | 26 |
| Figure S8. HPLC spectrum of 14b.....                                                                             | 26 |
| Figure S9. <sup>1</sup> H NMR spectrum of 14c.....                                                               | 27 |
| Figure S10. <sup>13</sup> C NMR spectrum of 14c.....                                                             | 27 |
| Figure S11. HRMS spectrum of 14c.....                                                                            | 28 |
| Figure S12. HPLC spectrum of 14c.....                                                                            | 28 |
| Figure S13. <sup>1</sup> H NMR spectrum of 14d.....                                                              | 29 |
| Figure S14. <sup>13</sup> C NMR spectrum of 14d .....                                                            | 29 |
| Figure S15. HRMS spectrum of 14d.....                                                                            | 30 |
| Figure S16. HPLC spectrum of 14d.....                                                                            | 30 |
| Figure S17. <sup>1</sup> H NMR spectrum of 14e.....                                                              | 31 |
| Figure S18. <sup>13</sup> C NMR spectrum of 14e.....                                                             | 31 |

|                                                      |    |
|------------------------------------------------------|----|
| Figure S19. HRMS spectrum of 14e.....                | 32 |
| Figure S20. HPLC spectrum of 14e.....                | 32 |
| Figure S21. <sup>1</sup> H NMR spectrum of 14f.....  | 33 |
| Figure S22. <sup>13</sup> C NMR spectrum of 14f..... | 33 |
| Figure S23. HRMS spectrum of 14f.....                | 34 |
| Figure S24. HPLC spectrum of 14f.....                | 34 |
| Figure S25. <sup>1</sup> H NMR spectrum of 14g.....  | 35 |
| Figure S26. <sup>13</sup> C NMR spectrum of 14g..... | 35 |
| Figure S27. HRMS spectrum of 14g.....                | 36 |
| Figure S28. HPLC spectrum of 14g.....                | 36 |
| Figure S29. <sup>19</sup> F NMR spectrum of 14g..... | 37 |
| Figure S30. <sup>1</sup> H NMR spectrum of 15a.....  | 37 |
| Figure S31. <sup>13</sup> C NMR spectrum of 15a..... | 38 |
| Figure S32. HRMS spectrum of 15a.....                | 38 |
| Figure S33. HPLC spectrum of 15a.....                | 39 |
| Figure S34. <sup>1</sup> H NMR spectrum of 15b.....  | 39 |
| Figure S35. <sup>13</sup> C NMR spectrum of 15b..... | 40 |
| Figure S36. HRMS spectrum of 15b.....                | 40 |
| Figure S37. HPLC spectrum of 15b.....                | 41 |
| Figure S38. <sup>1</sup> H NMR spectrum of 15c.....  | 41 |
| Figure S39. <sup>13</sup> C NMR spectrum of 15c..... | 42 |
| Figure S40. HRMS spectrum of 15c.....                | 42 |
| Figure S41. HPLC spectrum of 15c.....                | 43 |
| Figure S42. <sup>1</sup> H NMR spectrum of 15d.....  | 43 |
| Figure S43. <sup>13</sup> C NMR spectrum of 15d..... | 44 |
| Figure S44. HRMS spectrum of 15d.....                | 44 |
| Figure S45. HPLC spectrum of 15d.....                | 45 |
| Figure S46. <sup>1</sup> H NMR spectrum of 15e.....  | 45 |
| Figure S47. <sup>13</sup> C NMR spectrum of 15e..... | 46 |
| Figure S48. HRMS spectrum of 15e.....                | 46 |
| Figure S49. HPLC spectrum of 15e.....                | 47 |
| Figure S50. <sup>1</sup> H NMR spectrum of 15f.....  | 47 |
| Figure S51. <sup>13</sup> C NMR spectrum of 15f..... | 48 |
| Figure S52. HRMS spectrum of 15f.....                | 48 |
| Figure S53. HPLC spectrum of 15f.....                | 49 |
| Figure S54. <sup>1</sup> H NMR spectrum of 15g.....  | 49 |
| Figure S55. <sup>13</sup> C NMR spectrum of 15g..... | 50 |
| Figure S56. HRMS spectrum of 15g.....                | 50 |
| Figure S57. HPLC spectrum of 15g.....                | 51 |
| Figure S58. <sup>1</sup> H NMR spectrum of 15h.....  | 51 |
| Figure S59. <sup>13</sup> C NMR spectrum of 15h..... | 52 |
| Figure S60. HRMS spectrum of 15h.....                | 52 |
| Figure S61. HPLC spectrum of 15h.....                | 53 |
| Figure S62. <sup>1</sup> H NMR spectrum of 15i.....  | 53 |

|                                                        |    |
|--------------------------------------------------------|----|
| Figure S63. $^{13}\text{C}$ NMR spectrum of 15i .....  | 54 |
| Figure S64. HRMS spectrum of 15i .....                 | 54 |
| Figure S65. HPLC spectrum of 15i.....                  | 55 |
| Figure S66. $^1\text{H}$ NMR spectrum of 15j .....     | 55 |
| Figure S67. $^{13}\text{C}$ NMR spectrum of 15j .....  | 56 |
| Figure S68. HRMS spectrum of 15j .....                 | 56 |
| Figure S69. HPLC spectrum of 15j.....                  | 57 |
| Figure S70. $^1\text{H}$ NMR spectrum of 15k.....      | 57 |
| Figure S71. $^{13}\text{C}$ NMR spectrum of 15k .....  | 58 |
| Figure S72. HRMS spectrum of 15k.....                  | 58 |
| Figure S73. HPLC spectrum of 15k.....                  | 59 |
| Figure S74. $^1\text{H}$ NMR spectrum of 15l .....     | 59 |
| Figure S75. $^{13}\text{C}$ NMR spectrum of 15l .....  | 60 |
| Figure S76. HRMS spectrum of 15l .....                 | 60 |
| Figure S77. HPLC spectrum of 15l.....                  | 61 |
| Figure S78. $^1\text{H}$ NMR spectrum of 15m .....     | 61 |
| Figure S79. $^{13}\text{C}$ NMR spectrum of 15m .....  | 62 |
| Figure S80. HRMS spectrum of 15m .....                 | 62 |
| Figure S81. HPLC spectrum of 15m.....                  | 63 |
| Figure S82. $^1\text{H}$ NMR spectrum of 15n.....      | 63 |
| Figure S83. $^{13}\text{C}$ NMR spectrum of 15n .....  | 64 |
| Figure S84. HRMS spectrum of 15n.....                  | 64 |
| Figure S85. HPLC spectrum of 15n.....                  | 65 |
| Figure S86. $^1\text{H}$ NMR spectrum of 15o.....      | 65 |
| Figure S87. $^{13}\text{C}$ NMR spectrum of 15o .....  | 66 |
| Figure S88. HRMS spectrum of 15o.....                  | 66 |
| Figure S89. HPLC spectrum of 15o.....                  | 67 |
| Figure S90. $^1\text{H}$ NMR spectrum of 15p.....      | 67 |
| Figure S91. $^{13}\text{C}$ NMR spectrum of 15p .....  | 68 |
| Figure S92. HRMS spectrum of 15p.....                  | 68 |
| Figure S93. HPLC spectrum of 15p.....                  | 69 |
| Figure S94. $^1\text{H}$ NMR spectrum of 15q.....      | 69 |
| Figure S95. $^{13}\text{C}$ NMR spectrum of 15q .....  | 70 |
| Figure S96. HRMS spectrum of 15q.....                  | 70 |
| Figure S97. HPLC spectrum of 15q.....                  | 71 |
| Figure S98. $^1\text{H}$ NMR spectrum of 15r .....     | 71 |
| Figure S99. $^{13}\text{C}$ NMR spectrum of 15r .....  | 72 |
| Figure S100. HRMS spectrum of 15r .....                | 72 |
| Figure S101. HPLC spectrum of 15r .....                | 73 |
| Figure S102. $^1\text{H}$ NMR spectrum of 15s .....    | 73 |
| Figure S103. $^{13}\text{C}$ NMR spectrum of 15s.....  | 74 |
| Figure S104. HRMS spectrum of 15s.....                 | 74 |
| Figure S105. HPLC spectrum of 15s.....                 | 75 |
| Figure S106. $^{19}\text{F}$ NMR spectrum of 15s ..... | 75 |

|                                                        |    |
|--------------------------------------------------------|----|
| Figure S107. <sup>1</sup> H NMR spectrum of 15t .....  | 76 |
| Figure S108. <sup>13</sup> C NMR spectrum of 15t ..... | 76 |
| Figure S109. HRMS spectrum of 15t .....                | 77 |
| Figure S110. HPLC spectrum of 15t.....                 | 77 |
| Figure S111. <sup>1</sup> H NMR spectrum of 15u.....   | 78 |
| Figure S112. <sup>13</sup> C NMR spectrum of 15u ..... | 78 |
| Figure S113. HRMS spectrum of 15u.....                 | 79 |
| Figure S114. HPLC spectrum of 15u.....                 | 79 |
| Figure S115. <sup>1</sup> H NMR spectrum of 15v.....   | 80 |
| Figure S116. <sup>13</sup> C NMR spectrum of 15v ..... | 80 |
| Figure S117. HRMS spectrum of 15v.....                 | 81 |
| Figure S118. HPLC spectrum of 15v.....                 | 81 |
| Figure S119. <sup>1</sup> H NMR spectrum of 15w.....   | 82 |
| Figure S120. <sup>13</sup> C NMR spectrum of 15w ..... | 82 |
| Figure S121. HRMS spectrum of 15w.....                 | 83 |
| Figure S122. HPLC spectrum of 15w.....                 | 83 |
| Figure S123. <sup>1</sup> H NMR spectrum of 15x.....   | 84 |
| Figure S124. <sup>13</sup> C NMR spectrum of 15x ..... | 84 |
| Figure S125. HRMS spectrum of 15x.....                 | 85 |
| Figure S126. HPLC spectrum of 15x.....                 | 85 |

## General Information for Chemical Synthesis

To a 500 mL round-bottom flask charged with alepterolic acid (4.99 mmol, 1.60 g, 1.00 eq) in CH<sub>2</sub>Cl<sub>2</sub> (200 mL) were added *N,N*-diisopropylethylamine (DIPEA, 9.98 mmol, 1.74 mL, 2.00 eq) and HATU (7.49 mmol, 2.85 g, 1.50 eq). The mixture was stirred at room temperature with magnetic stirring for 1 h. The alepterolic acid was converted into the activated ester intermediate as confirmed by TLC (CH<sub>2</sub>Cl<sub>2</sub>: MeOH = 10:1). The resulting solution of activated ester intermediate was then added dropwise to a solution of piperazine (14.97 mmol, 1.29 g, 3.00 eq) in CH<sub>2</sub>Cl<sub>2</sub> (200 mL). The resulted mixture was stirred at room temperature overnight. The reaction was quenched with water, extracted three times with CH<sub>2</sub>Cl<sub>2</sub>. The organic layer was washed once with saturated NaCl solution and then dried over anhydrous sodium sulfate and concentrated *in vacuo*. The residue was purified by column chromatography (200- 300 mesh) to yield the intermediate **13** as white solid (yield: 95%).

For synthesis of the target compounds **14a~14g** and **15a~15t**, intermediate **13** (0.15 mmol, 58.29 mg, 1.50 eq) and DIPEA (0.30 mmol, 0.05 mL, 3.00 eq) was added to the solution of the isocyanate (0.30 mmol, 3.00 eq). The reaction was carried out at room temperature with stirring for 1 h. The reaction was confirmed to be complete by TLC (CH<sub>2</sub>Cl<sub>2</sub>: MeOH = 10:1). The solution was purified by silica gel column chromatography (200- 300 mesh) to obtain the target products. The isocyanates were commercially purchased, except from **14a**, **15s** and **15t**. These three isocyanates prepared from the reaction of corresponding amines (0.30 mmol, 3.00 eq), triphosgene (0.10 mmol, 1.00 eq) and DIPEA (0.60 mmol, 0.10 mL, 6.00 eq) *in situ*. The reaction was conducted in ice water for 1h to obtain as crude products, which used without further purification (yield: 70-96%).

For synthesis of the target compounds **15u~15x**, compound **13** (0.15 mmol, 58.29 mg, 1.50 eq) and DIPEA (0.30 mmol, 0.05 mL, 3.00 eq) was added to the solution of the isocyanate (0.08 mmol, 0.75 eq). The next operations were similar to the synthesis of **14a** (yield: 91-96%).

## Detailed Information of Cell Lines Used in This Study

A549 human non-small cell lung cancer cells, MCF-7 human breast cancer cells, and LX-2 human normal hepatic cells were purchased from Shanghai Fuheng Biotechnology Co., Ltd (Shanghai, China). HepG2 cells were purchased from National Collection of Authenticated Cell Cultures, Chinese Academy of Sciences (Shanghai, China). H460 human large cell lung cancer cells and MDA-MB-231 human triple-negative breast cancer cells were purchased from Procell Life Science & Technology Co., Ltd. (Wuhan, China). 16HBE cells are a gift from Prof. Zi Liu, originally provided

by the Cell Resource Center of the Chinese Academy of Medical Sciences (Beijing, China)

### **Cell Viability Assay**

Cells in exponential growth phase with good viability were selected and processed to generate a homogeneous single-cell suspension. Compounds were added, followed by continued incubation. After 72 h of treatment, 20  $\mu$ L of MTT reagent was added to each well, and the incubation was prolonged for an additional 3 h. Subsequently, 100  $\mu$ L solution (10% sodium dodecyl sulfate [SDS], 5% iso-butanol, 0.01 M hydrochloric acid [HCl]) was introduced into each well. Following a 12-h incubation period, the absorbance was measured at 570 nm using a microplate reader. Cell viability, inhibition rate, and half-maximal inhibitory concentration ( $IC_{50}$ ) values for each compound were subsequently calculated using Microsoft Excel and GraphPad Prism software.

### **Cloning Assay**

A549 cells in the logarithmic growth phase were selected and processed to generate a homogeneous single-cell suspension. Following 24 h of initial incubation, compounds were added (1, 2, 4  $\mu$ M), and the incubation was continued for an additional 24 h. Subsequently, the culture medium was replaced with fresh medium, and the cells were further cultured. Fresh medium was renewed every 48 h until visible cell colonies emerged. After that, medium was discarded, and 1 mL of fixing agent (10% acetic acid, 10% methanol, 80% ultrapure water) was added to each well. After 15 min, the fixative was removed, and each well was rinsed with 1 mL PBS. Thereafter, 1 mL of crystal violet staining solution was added to each well. After 1 min, the crystal violet solution was recovered. The 6-well plate was gently rinsed for 30 s, then inverted on a clean bench and air-dried naturally. Images of the cell colonies were captured, and data analysis was performed using ImageJ and GraphPad Prism 8.0 software, followed by graph plotting.

### **Scratch Wound Healing Assay**

A 6-well plate was prepared, and three parallel lines were marked at the bottom of each well. A549 cells in good growth status were selected, and the cells were plated at a density of  $3.0 \times 10^5$  per well. A homogeneous single-cell suspension was prepared and seeded into the pre-marked 6-well plate. After 24 h, the scratch wound was made. Next, compounds were added to the corresponding wells, and images were captured at the pre-marked positions. The cells were continuously cultured for an additional 72 h, after which cell migration was observed and images were captured again at the same marked positions. Image analysis was performed using ImageJ software to measure scratch widths. Statistical analysis of the data was conducted using GraphPad Prism 8.0

software, and graphs were generated. The scratch healing rate was calculated using the following formula:

$$\text{Scratch healing rate} = (\text{Scratch width at 0 h} / \text{Scratch width at 72 h}) / \text{Scratch width at 0 h} \times 100\%$$

### **Cell Proliferation Assay**

A549 cells in good growth status were selected and prepared to be a homogeneous single-cell suspension with a density of  $1.0 \times 10^5$  cells/mL. The cell suspension was seeded at a volume of 2 mL per well. Experimental groups were set up with incubation time at 24 h, 48 h, and 72 h. After 24 h, compounds were added to the corresponding groups. At 24 h, 48 h, and 72 h, cell counts were determined using a cell counter. Finally, cell growth curves were plotted using GraphPad Prism software.

### **Cell Morphology Observation Assay**

A549 cells in good growth status were selected and processed to a homogeneous single-cell suspension. The suspension was seeded into a 6-well plate at a density of  $3.0 \times 10^5$  cells with a total volume of 2 mL per well. After 24 h of incubation, compounds at different concentrations were added to the respective wells. Following an additional 24 h of continuous incubation, the cells were observed under a phase-contrast microscope, and images were captured.

### **Nuclear Morphology Observation Assay**

A549 cells in good growth status were selected and processed to a homogeneous single-cell suspension. The suspension was seeded into culture wells at a density of  $2.0 \times 10^5$  cells with a total volume of 2 mL per well. After 24 h of incubation, compounds were added, and the incubation was continued for an additional 24 h. Subsequently, the supernatant was discarded, and 1 mL of cell staining buffer was added to each well, followed by the addition of 5  $\mu$ L of Hoechst staining solution. The mixture was gently mixed and incubated on ice or at 4 °C for 20–30 min. After incubation, the cells were washed with PBS. One drop of fluorescence enhancer was added, and the cell-bearing coverslip was then inverted onto the slide. The samples were observed under a fluorescence microscope, and images were captured.

### **Cell Cycle Detection Assay**

A549 cells in good growth status were selected and processed to a homogeneous single-cell suspension. The suspension was seeded into wells at a density of  $3.0 \times 10^5$  cells with a total volume of 2 mL per well. After 24 h, compounds at different concentrations were added, and the incubation was continued for an additional 24 h. Subsequently, cell cycle detection was performed strictly following the manufacturer's

instructions provided by the cell cycle detection kit (Beyotime Biotechnology Co., Ltd.). Data analysis was performed using GraphPad Prism 8.0 software, and graphs were generated.

### **Apoptosis Detection Assay**

A549 cells in good growth status were selected and processed to a homogeneous single-cell suspension. The suspension was seeded into wells at a density of  $3.0 \times 10^5$  cells with a total volume of 2 mL per well. After 24 h of initial incubation, compounds were added, and the incubation was cultured for an additional 24 h. Subsequently, the staining solution was prepared in strict accordance with the instructions provided with the Beyotime Apoptosis Detection Kit, followed by the performance of relevant subsequent staining and detection procedures.

### **Mitochondrial Membrane Potential Detection Assay**

A549 cells in good growth status were selected and processed to a homogeneous single-cell suspension. The suspension was seeded into wells at a density of  $3.0 \times 10^5$  cells with a total volume of 2 mL per well, followed by initial incubation. After 24 h, test compounds were added, and incubation was continued for 24 h. Subsequently, carbonyl cyanide 3-chlorophenylhydrazone (CCCP), a positive control agent, was added to the positive control wells at a dilution ratio of 1:1000 for 20 min. Concurrently, relevant staining solutions were prepared and subsequent staining operations were performed in strict accordance with the instructions provided with the Beyotime Mitochondrial Membrane Potential Detection Kit.

### **Western blotting**

Proteins were extracted using SDS lysis buffer and subjected to sodium dodecyl sulfate-polyacrylamide gel electrophoresis (SDS-PAGE). Subsequently, proteins separated on the gel were transferred onto a nitrocellulose membrane (NC membrane). The membrane was blocked with 5% non-fat milk in Tris-buffered saline containing Tween 20 (TBST). The aforementioned antibodies were used as primary antibodies for membrane probing, followed by incubation with a horseradish peroxidase (HRP)-conjugated secondary antibody. Target proteins on the membrane were visualized using an enhanced chemiluminescence (ECL) kit (Proteintech Group, Inc.). The density of the protein bands was quantitatively analyzed using ImageJ software.

### **ADMET Analysis**

The physicochemical properties and pharmacokinetic profiles of the target compounds were evaluated using two online web databases: ADMET Lab 3.0 (<https://admetlab3.scbdd.com/>) and SwissADME (<http://www.swissadme.ch/>). These

properties primarily include five key aspects of drug disposition: absorption, distribution, metabolism, excretion, and toxicity (ADMET).

### Protein Docking

The apoptotic protein structures were retrieved on online databases, including UniProt (<https://www.uniprot.org/>) and RCSB PDB (<https://www.rcsb.org/>). Compound structures were drawn using ChemDraw 20.0 software. AutoDock Tools software was employed to perform pre-docking optimization of both compound and apoptotic proteins, involving water molecule removal and hydrogenation; subsequently, the docking free energy was calculated. The binding modes of compound with apoptotic proteins were visualized using PyMOL software, and the resulting images were edited using PowerPoint software.

- 1□. Protein and PDB ID: Caspase-3 (1GFW) 、Bax (4BD6) 、Bcl-2 (1G5M) 、Caspase-9 (2AR9) 、PARP-1 (4OPX)
- 2□. Software: AutoDockTools-1.5.7
- 3□. Scoring function: Vina default scoring
- 4□. Exhaustiveness: 8
- 5□. Flexible handling strategy: Rigid frame, flexible side chain
- 6□. Website for protein structures: <https://www.uniprot.org/>;<https://www.rcsb.org/>
- 7□. Treatment of small molecule ligands: Minimum binding free energy (ChemDraw 20.0; Chem3D 20.0 )
- 8□. Grid spacing: 0.375 Å
- 9□. Clustering algorithms and clustering thresholds: No built-in clustering
- 10□. CPU model: Intel® Core (TM) i5-3210M CPU @ 2.50 GHZ 2.50GHZ
- 11□. OS version: Win\_64 flagship version
- 12□. Connect pocket parameters (See Table 1 and Table 2)

**Table 1.** the connect pocket parameters of compound **15o**

| Caspase-3         | Bax               | Bcl-2            | Caspase-9         | PARP-1         |
|-------------------|-------------------|------------------|-------------------|----------------|
| center x = 26.71  | center x = -16.34 | center x = 3.061 | center x = 23.957 | center x =     |
| center y = 22.591 | center y = -9.58  | center y = -9.58 | center y = 33.011 | 17.644         |
| center z = 37.128 | center z = 8.335  | center z = 2.734 | center z = 27.123 | center y =     |
| size x = 66.15    | size x = 70.7     | size x = 68.46   | size x = 111.16   | 33.011         |
| size y = 66.15    | size y = 70.7     | size y = 68.46   | size y = 111.16   | center z =     |
| size z = 66.15    | size z = 70.7     | size z = 68.46   | size z = 111.16   | 31.626         |
|                   |                   | size z = 68.46   | size z = 111.16   | size x = 126.0 |

---

size y = 126.0

size z = 126.0

---

**Table 2.** the connect pocket parameters of compound **15u**

| Caspase-3         | Bax                | Bcl-2             | Caspase-9         | PARP-1            |
|-------------------|--------------------|-------------------|-------------------|-------------------|
| center x = 26.71  | center x = -16.94  | center x = 1.954  | center x = 19.547 | center x = 19.547 |
| center y = 22.591 | center y = -16.647 | center y = -3.058 | center y = 38.445 | center y = 51.59  |
| center z = 37.128 | center z = -0.94   | center z = 3.202  | center z = 23.65  | center z = 36.625 |
| size x = 53.9     | size x = 69.3      | size x = 54.46    | size x = 105.0    | size x = 126.0    |
| size y = 53.9     | size y = 69.3      | size y = 54.46    | size y = 105.0    | size y = 126.0    |
| size z = 53.9     | size z = 69.3      | size z = 54.46    | size z = 105.0    | size z = 126.0    |

---

## Data Processing and Statistical Analysis

All experiments were performed in triplicate at minimum. Image processing was conducted using Photoshop software, while cell count and quantitative analysis of band densities were performed using ImageJ software. Data collation and statistical analysis were carried out using GraphPad Prism 8.0 software, with statistical graphs generated simultaneously. Statistical comparisons were performed using the t-test. In the graphs, statistical significance was denoted as follows: \* $p < 0.05$ , \*\* $p < 0.01$ , and \*\*\* $p < 0.001$ .

## Structural characterization of synthetic compounds

*N*-Butyl-4-((*E*)-5-((1*R*,4*aS*,6*R*,8*aS*)-6-hydroxy-5,5,8*a*-trimethyl-2-methylenedecahydronaphthalen-1-yl)-3-methylpent-2-enoyl)

piperazine-1-

carboxamide (**14a**)

Colorless oil, yield 70%, <sup>1</sup>H NMR (400 MHz, CDCl<sub>3</sub>) δ 5.72 (s, 1H), 4.86 (s, 1H), 4.51 (s, 1H), 4.49 (t, *J* = 5.2 Hz, 1H), 3.71 – 3.59 (m, 2H), 3.53 – 3.46 (m, 2H), 3.46 – 3.38 (m, 2H), 3.38 – 3.28 (m, 2H), 3.28 – 3.18 (m, 3H), 2.40 (ddd, *J* = 12.8, 4.2, 2.4 Hz, 1H), 2.29 – 2.20 (m, 1H), 1.99 – 1.89 (m, 2H), 1.88 (s, 3H), 1.80 – 1.55 (m, 7H), 1.49 (t, *J* = 6.6 Hz, 3H), 1.40 – 1.30 (m, 3H), 1.15 (td, *J* = 13.1, 3.8 Hz, 1H), 1.06 (dd, *J* = 12.5, 2.8 Hz, 1H), 0.98 (s, 3H), 0.92 (t, *J* = 7.3 Hz, 3H), 0.76 (s, 3H), 0.68 (s, 3H). <sup>13</sup>C NMR (101 MHz, CDCl<sub>3</sub>) δ 167.54, 157.60, 150.94, 147.75, 116.78, 106.80, 78.72, 55.92, 54.67, 45.94, 43.91, 43.60, 40.75, 40.65, 39.41, 39.13, 38.57, 38.17, 37.09, 32.30, 28.30, 27.87, 23.99, 21.57, 20.09, 18.72, 15.41, 14.52, 13.81. HRMS calc for C<sub>29</sub>H<sub>50</sub>N<sub>3</sub>O<sub>3</sub> [M+H]<sup>+</sup>: 488.3852, found 488.3854. HPLC purity: 97.86%, retention time: 12.640 min.

*N*-(tert-Butyl)-4-((*E*)-5-((1*R*,4*aS*,6*R*,8*aS*)-6-hydroxy-5,5,8*a*-trimethyl-2-methylenedecahydronaphthalen-1-yl)-3-methylpent-2-enoyl) piperazine-1-carboxamide (**14b**)

Colorless oil, yield 95%, <sup>1</sup>H NMR (400 MHz, CDCl<sub>3</sub>) δ 5.70 (s, 1H), 4.84 (s, 1H), 4.49 (s, 1H), 4.33 (s, 1H), 3.67 – 3.58 (m, 2H), 3.50 – 3.42 (m, 2H), 3.38 – 3.31 (m, 2H), 3.30 – 3.23 (m, 2H), 3.21 (dd, *J* = 11.6, 4.4 Hz, 1H), 2.38 (dt, *J* = 12.3, 3.2 Hz, 1H), 2.26 – 2.18 (m, 1H), 1.97 – 1.89 (m, 2H), 1.86 (s, 3H), 1.77 – 1.51 (m, 7H), 1.39 (qd, *J* = 12.9, 4.2 Hz, 1H), 1.32 (s, 9H), 1.12 (td, *J* = 13.1, 3.6 Hz, 1H), 1.04 (dd, *J* = 12.5, 2.7 Hz, 1H), 0.96 (s, 3H), 0.74 (s, 3H), 0.66 (s, 3H). <sup>13</sup>C NMR (101 MHz, Chloroform-*d*) δ 167.53, 156.74, 150.83, 147.75, 116.80, 106.79, 78.68, 55.90, 54.67, 50.98, 45.92, 44.07, 43.42, 40.74, 39.40, 39.13, 38.55, 38.16, 37.10, 29.40, 28.33, 27.86, 23.99, 21.56, 18.71, 15.43, 14.50. HRMS calc for C<sub>29</sub>H<sub>50</sub>N<sub>3</sub>O<sub>3</sub> [M+H]<sup>+</sup>: 488.3852, found 488.3856. HPLC purity: 98.66%, retention time: 12.953 min.

*N*-Cyclopentyl-4-((*E*)-5-((1*R*,4*aS*,6*R*,8*aS*)-6-hydroxy-5,5,8*a*-trimethyl-2-methylenedecahydronaphthalen-1-yl)-3-methylpent-2-enoyl) piperazine-1-carboxamide (**14c**)

Colorless oil, yield 91%, <sup>1</sup>H NMR (400 MHz, CDCl<sub>3</sub>) δ 5.69 (s, 1H), 4.83 (s, 1H), 4.53 (s, 1H), 4.48 (s, 1H), 4.07 – 4.01 (m, 1H), 3.69 – 3.57 (m, 2H), 3.51 – 3.43 (m, 2H), 3.42 – 3.36 (m, 2H), 3.33 – 3.24 (m, 2H), 3.21 (dd, *J* = 11.6, 4.3 Hz, 1H), 2.37 (ddd, *J* = 12.8, 4.2, 2.4 Hz, 1H), 2.26 – 2.18 (m, 1H), 1.99 – 1.86 (m, 4H), 1.84 (s, 3H), 1.77 – 1.49 (m, 11H), 1.39 – 1.27 (m, 3H), 1.12 (td, *J* = 13.2, 3.9 Hz, 1H), 1.03 (dd, *J* = 12.6, 2.7 Hz, 1H), 0.95 (s, 3H), 0.73 (s, 3H), 0.65 (s, 3H). <sup>13</sup>C NMR (101 MHz, CDCl<sub>3</sub>) δ 167.60, 157.39, 150.91, 147.78, 116.79, 106.82, 78.67, 55.93, 54.70, 52.70, 45.98, 43.91, 43.60, 40.79, 39.43, 39.16, 38.57, 38.20, 37.14, 33.53, 28.36, 27.87, 24.03, 23.72, 21.59, 18.77, 15.49, 14.54. HRMS calc for C<sub>30</sub>H<sub>50</sub>N<sub>3</sub>O<sub>3</sub> [M+H]<sup>+</sup>: 500.3852, found 500.3855. HPLC purity: 98.66%, retention time: 12.953 min.

*N*-Cyclohexyl-4-((*E*)-5-((1*R*,4*aS*,6*R*,8*aS*)-6-hydroxy-5,5,8*a*-trimethyl-2-methylenedecahydronaphthalen-1-yl)-3-methylpent-2-enoyl) piperazine-1-carboxamide (**14d**)

Colorless oil, yield, 92%,  $^1\text{H}$  NMR (400 MHz,  $\text{CDCl}_3$ )  $\delta$  5.69 (s, 1H), 4.82 (s, 1H), 4.47 (s, 1H), 4.44 (s, 1H), 3.68 – 3.54 (m, 3H), 3.52 – 3.43 (m, 2H), 3.42 – 3.34 (m, 2H), 3.33 – 3.25 (m, 2H), 3.20 (dd,  $J = 11.7, 4.4$  Hz, 1H), 2.37 (ddd,  $J = 12.8, 4.2, 2.4$  Hz, 1H), 2.26 – 2.15 (m, 1H), 1.96 – 1.85 (m, 4H), 1.84 (s, 3H), 1.78 – 1.44 (m, 10H), 1.38 – 1.25 (m, 3H), 1.16 – 1.06 (m, 3H), 1.03 (dd,  $J = 12.5, 2.3$  Hz, 2H), 0.95 (s, 3H), 0.73 (s, 3H), 0.65 (s, 3H).  $^{13}\text{C}$  NMR (101 MHz,  $\text{CDCl}_3$ )  $\delta$  167.63, 156.92, 150.92, 147.77, 116.77, 106.82, 78.67, 55.91, 54.68, 49.66, 45.97, 43.88, 43.59, 40.78, 39.42, 39.16, 38.55, 38.19, 37.12, 33.92, 28.36, 27.84, 25.65, 25.11, 24.01, 21.57, 18.78, 15.50, 14.54. HRMS calc for  $\text{C}_{31}\text{H}_{52}\text{N}_3\text{O}_3$   $[\text{M}+\text{H}]^+$ : 514.4009, found 514.4008. HPLC purity: 100.00%, retention time: 13.993 min.

*N*-Dodecyl-4-((*E*)-5-((1*R*,4*aS*,6*R*,8*aS*)-6-hydroxy-5,5,8*a*-trimethyl-2-methylenedecahydronaphthalen-1-yl)-3-methylpent-2-enoyl) piperazine-1-carboxamide (**14e**)

Light yellow oil, yield 88%,  $^1\text{H}$  NMR (400 MHz,  $\text{CDCl}_3$ )  $\delta$  5.70 (s, 1H), 4.84 (s, 1H), 4.58 (t,  $J = 5.5$  Hz, 1H), 4.50 (s, 1H), 3.67 – 3.58 (m, 2H), 3.51 – 3.44 (m, 2H), 3.44 – 3.37 (m, 2H), 3.35 – 3.27 (m, 2H), 3.26 – 3.16 (m, 3H), 2.39 (ddd,  $J = 12.8, 4.2, 2.4$  Hz, 1H), 2.28 – 2.19 (m, 1H), 1.95 – 1.89 (m, 2H), 1.86 (s, 3H), 1.78 – 1.47 (m, 9H), 1.37 (qd,  $J = 12.9, 4.2$  Hz, 1H), 1.29 – 1.21 (m, 18H), 1.13 (td,  $J = 13.1, 3.9$  Hz, 1H), 1.05 (dd,  $J = 12.5, 2.7$  Hz, 1H), 0.97 (s, 3H), 0.85 (t,  $J = 6.7$  Hz, 3H), 0.75 (s, 3H), 0.67 (s, 3H).  $^{13}\text{C}$  NMR (101 MHz,  $\text{CDCl}_3$ )  $\delta$  167.61, 157.68, 150.99, 147.83, 116.86, 106.87, 78.76, 56.00, 54.76, 46.02, 44.00, 43.68, 41.16, 40.83, 39.49, 39.22, 38.65, 38.25, 37.19, 31.99, 30.31, 29.69, 29.43, 28.41, 27.95, 27.06, 24.08, 22.76, 21.66, 18.80, 15.51, 14.58, 14.20. HRMS calc for  $\text{C}_{37}\text{H}_{65}\text{N}_3\text{O}_3\text{Na}$   $[\text{M} + \text{Na}]^+$ : 622.4924, found 622.4926. HPLC purity: 97.06%, retention time: 16.613 min.

*N*-(2-Chloroethyl)-4-((*E*)-5-((1*R*,4*aS*,6*R*,8*aS*)-6-hydroxy-5,5,8*a*-trimethyl-2-methylenedecahydronaphthalen-1-yl)-3-methylpent-2-enoyl) piperazine-1-carboxamide (**14f**)

Colorless oil, yield 90%,  $^1\text{H}$  NMR (400 MHz,  $\text{CDCl}_3$ )  $\delta$  5.70 (s, 1H), 4.83 (s, 1H), 4.48 (s, 1H), 4.01 (s, 1H), 3.77 – 3.59 (m, 4H), 3.61 – 3.32 (m, 8H), 3.21 (dd,  $J = 11.7, 4.4$  Hz, 1H), 2.38 (d,  $J = 13.9$  Hz, 1H), 2.27 – 2.17 (m, 1H), 1.96 – 1.87 (m, 2H), 1.85 (s, 3H), 1.77 – 1.45 (m, 7H), 1.36 (qd,  $J = 12.9, 4.2$  Hz, 1H), 1.13 (td,  $J = 13.1, 3.9$  Hz, 1H), 1.04 (dd,  $J = 12.5, 2.7$  Hz, 1H), 0.96 (s, 3H), 0.74 (s, 3H), 0.66 (s, 3H).  $^{13}\text{C}$  NMR (101 MHz,  $\text{CDCl}_3$ )  $\delta$  167.68, 157.26, 151.20, 147.78, 116.70, 106.86, 78.74, 55.93, 54.68, 45.91, 44.78, 43.85, 43.69, 42.73, 40.82, 39.44, 39.17, 38.59, 38.20, 37.13, 28.38, 27.86, 24.02, 21.60, 18.82, 15.52, 14.57. HRMS calc for  $\text{C}_{27}\text{H}_{44}\text{ClN}_3\text{O}_3\text{Na}$   $[\text{M} + \text{Na}]^+$ : 516.2969, found 516.2972. HPLC purity: 95.89%, retention time: 11.217 min.

4-((*E*)-5-((1*R*,4*aS*,6*R*,8*aS*)-6-Hydroxy-5,5,8*a*-trimethyl-2-methylenedecahydronaphthalen-1-yl)-3-methylpent-2-enoyl)-*N*-(2,2,2-trifluoroethyl) piperazine-1-carboxamide (**14g**)

Colorless oil, yield 87%,  $^1\text{H}$  NMR (400 MHz,  $\text{CDCl}_3$ )  $\delta$  5.71 (s, 1H), 5.23 (t,  $J = 6.5$  Hz, 1H), 4.85 (s, 1H), 4.50 (s, 1H), 3.89 (qd,  $J = 9.1, 6.3$  Hz, 2H), 3.71 – 3.60 (m, 2H), 3.55 – 3.34 (m, 6H), 3.22 (dd,  $J = 11.7, 4.4$  Hz, 1H), 2.40 (dd,  $J = 12.8, 2.4$  Hz, 1H), 2.29 – 2.19 (m, 1H), 1.99 – 1.90 (m, 2H), 1.87 (s, 3H), 1.78 – 1.52 (m, 7H), 1.38 (qd,  $J = 12.9, 4.0$  Hz, 1H), 1.14 (td,  $J = 13.2, 3.9$  Hz, 1H), 1.05 (dd,  $J = 12.5, 2.7$  Hz, 1H), 0.98 (s, 3H), 0.76 (s, 3H), 0.68 (s, 3H).  $^{13}\text{C}$  NMR (101 MHz,  $\text{CDCl}_3$ )  $\delta$  167.67, 156.60, 151.49, 147.85, 124.56 (q,  $J = 278.4$  Hz), 116.67, 106.90, 78.84, 56.05, 54.79, 45.87, 44.04, 43.93, 43.85, 42.09 (q,  $J = 34.3$  Hz), 40.77, 39.52, 39.24, 38.72, 38.27, 37.21, 28.41, 27.97, 24.10, 21.71, 18.83, 15.51, 14.60. HRMS calc for  $\text{C}_{27}\text{H}_{43}\text{F}_3\text{N}_3\text{O}_3$   $[\text{M}+\text{H}]^+$ : 514.3257, found 514.3255. HPLC purity: 100.00%, retention time: 11.797 min.  $^{19}\text{F}$  NMR (376 MHz,  $\text{CDCl}_3$ )  $\delta$  -72.99.

4-((*E*)-5-((1*R*,4*aS*,6*R*,8*aS*)-6-Hydroxy-5,5,8*a*-trimethyl-2-methylenedecahydronaphthalen-1-yl)-3-methylpent-2-enoyl)-*N*-phenylpiperazine-1-carboxamide (**15a**)

Colorless oil, yield 92%,  $^1\text{H}$  NMR (400 MHz,  $\text{CDCl}_3$ )  $\delta$  7.24 – 7.14 (m, 4H), 6.96 (t,  $J = 7.2$  Hz, 1H), 6.38 (s, 1H), 5.65 (s, 1H), 4.78 (s, 1H), 4.43 (s, 1H), 3.68 – 3.59 (m, 2H), 3.48 – 3.35 (m, 6H), 3.15 (dd,  $J = 11.7, 4.4$  Hz, 1H), 2.32 (ddd,  $J = 12.7, 4.2, 2.3$  Hz, 1H), 2.20 – 2.14 (m, 1H), 1.89 – 1.83 (m, 2H), 1.81 (s, 3H), 1.72 – 1.50 (m, 7H), 1.30 (qd,  $J = 13.0, 4.2$  Hz, 3H), 1.08 (td,  $J = 13.2, 3.7$  Hz, 1H), 0.98 (dd,  $J = 12.5, 2.7$  Hz, 1H), 0.90 (s, 3H), 0.68 (s, 3H), 0.60 (s, 3H).  $^{13}\text{C}$  NMR (101 MHz,  $\text{CDCl}_3$ )  $\delta$  167.70, 155.12, 151.53, 147.92, 138.81, 129.13, 123.65, 120.31, 116.79, 106.98, 78.92, 56.10, 54.84, 46.04, 44.50, 43.98, 40.96, 39.59, 39.30, 38.80, 38.34, 37.27, 28.48, 28.05, 24.16, 21.77, 18.93, 15.57, 14.68. HRMS calc for  $\text{C}_{31}\text{H}_{45}\text{N}_3\text{O}_3\text{Na}$   $[\text{M}+\text{Na}]^+$ : 530.3359, found 530.3358. HPLC purity: 99.69%, retention time: 12.207 min.

4-((*E*)-5-((1*R*,4*aS*,6*R*,8*aS*)-6-Hydroxy-5,5,8*a*-trimethyl-2-methylenedecahydronaphthalen-1-yl)-3-methylpent-2-enoyl)-*N*-(*p*-tolyl) piperazine-1-carboxamide (**15b**)

Colorless oil, yield 96%,  $^1\text{H}$  NMR (400 MHz,  $\text{CDCl}_3$ )  $\delta$  7.20 (d,  $J = 8.3$  Hz, 2H), 7.05 (d,  $J = 8.1$  Hz, 2H), 6.91 (s, 1H), 5.71 (s, 1H), 4.85 (s, 1H), 4.50 (s, 1H), 3.70 – 3.58 (m, 2H), 3.52 – 3.38 (m, 6H), 3.21 (dd,  $J = 11.6, 4.4$  Hz, 1H), 2.39 (d,  $J = 2.4$  Hz, 1H), 2.27 (s, 3H), 2.25 – 2.19 (m, 1H), 1.97 – 1.88 (m, 2H), 1.86 (s, 3H), 1.80 – 1.45 (m, 7H), 1.35 (qd,  $J = 12.9, 4.2$  Hz, 1H), 1.13 (td,  $J = 13.1, 3.9$  Hz, 1H), 1.04 (dd,  $J = 12.5, 2.7$  Hz, 1H), 0.96 (s, 3H), 0.75 (s, 3H), 0.67 (s, 3H).  $^{13}\text{C}$  NMR (101 MHz,  $\text{CDCl}_3$ )  $\delta$  167.67, 155.52, 151.16, 147.78, 136.28, 133.00, 129.40, 120.72, 116.72, 106.86, 78.71, 55.97, 54.71, 45.99, 44.32, 43.84, 40.94, 39.45, 39.17, 38.61, 38.22, 37.16, 28.38, 27.88, 24.04, 21.62, 20.84, 18.83, 15.52, 14.56. HRMS calc for  $\text{C}_{32}\text{H}_{47}\text{N}_3\text{O}_3\text{Na}$   $[\text{M}+\text{Na}]^+$ : 544.3515, found 544.3514. HPLC purity: 98.96%, retention time: 14.637 min.

4-((*E*)-5-((1*R*,4*aS*,6*R*,8*aS*)-6-Hydroxy-5,5,8*a*-trimethyl-2-methylenedecahydronaphthalen-1-yl)-3-methylpent-2-enoyl)-*N*-(*o*-tolyl) piperazine-1-carboxamide (**15c**)

Colorless oil, yield 94%, <sup>1</sup>H NMR (400 MHz, CDCl<sub>3</sub>) δ 7.40 (d, 1H), 7.18 – 7.10 (m, 2H), 7.02 (td, *J* = 7.4, 1.3 Hz, 1H), 6.51 (s, 1H), 5.70 (s, 1H), 4.85 (s, 1H), 4.50 (s, 1H), 3.69 – 3.59 (m, 2H), 3.50 – 3.36 (m, 6H), 3.21 (dd, *J* = 11.7, 4.4 Hz, 1H), 2.44 – 2.35 (m, 1H), 2.30 – 2.21 (m, 1H), 2.20 (s, 3H), 1.98 – 1.89 (m, 2H), 1.87 (s, 3H), 1.78 – 1.46 (m, 7H), 1.37 (qd, *J* = 12.9, 4.2 Hz, 1H), 1.10 (td, *J* = 3.9 Hz, 1H), 1.04 (dd, *J* = 12.5, 2.7 Hz, 1H), 0.96 (s, 3H), 0.74 (s, 3H), 0.67 (s, 3H). <sup>13</sup>C NMR (101 MHz, CDCl<sub>3</sub>) δ 167.62, 155.75, 151.27, 147.76, 136.66, 130.51, 130.44, 126.63, 124.87, 123.93, 116.62, 106.80, 78.67, 55.91, 54.66, 45.87, 44.32, 43.93, 40.81, 39.41, 39.12, 38.59, 38.17, 37.11, 28.33, 27.80, 23.99, 21.58, 18.78, 17.89, 15.47, 14.53. HRMS calc for C<sub>32</sub>H<sub>48</sub>N<sub>3</sub>O<sub>3</sub> [M+H]<sup>+</sup>: 522.3696, found 522.3700. HPLC purity: 98.34%, retention time: 13.540 min.

*N*-Benzyl-4-((*E*)-5-((1*R*,4*aS*,6*R*,8*aS*)-6-hydroxy-5,5,8*a*-trimethyl-2-methylenedecahydronaphthalen-1-yl)-3-methylpent-2-enoyl) piperazine-1-carboxamide (**15d**)

Colorless oil, yield 91%, <sup>1</sup>H NMR (400 MHz, CDCl<sub>3</sub>) δ 7.32 – 7.24 (m, 5H), 5.69 (s, 1H), 4.87 (t, *J* = 5.1 Hz, 1H), 4.84 (s, 1H), 4.49 (s, 1H), 4.40 (d, *J* = 5.3 Hz, 2H), 3.67 – 3.57 (m, 2H), 3.51 – 3.37 (m, 4H), 3.37 – 3.25 (m, 2H), 3.21 (dd, *J* = 11.7, 4.4 Hz, 1H), 2.38 (ddd, *J* = 12.8, 4.3, 2.4 Hz, 1H), 2.26 – 2.17 (m, 1H), 1.96 – 1.87 (m, 2H), 1.86 (s, 3H), 1.77 – 1.50 (m, 7H), 1.36 (qd, *J* = 13.0, 4.3 Hz, 1H), 1.12 (td, *J* = 13.0, 3.9 Hz, 1H), 1.03 (dd, *J* = 12.5, 2.6 Hz, 1H), 0.96 (s, 3H), 0.74 (s, 3H), 0.66 (s, 3H). <sup>13</sup>C NMR (101 MHz, CDCl<sub>3</sub>) δ 167.63, 157.48, 151.15, 147.84, 139.20, 128.79, 127.91, 127.56, 116.82, 106.91, 78.82, 56.00, 54.75, 45.99, 45.17, 44.02, 43.78, 40.84, 39.51, 39.23, 38.67, 38.27, 28.43, 27.96, 24.09, 21.66, 18.84, 15.53, 14.61. HRMS calc for C<sub>32</sub>H<sub>48</sub>N<sub>3</sub>O<sub>3</sub> [M+H]<sup>+</sup>: 522.3696, found 522.3698. HPLC purity: 100.00%, retention time: 13.213 min.

*N*-(3,5-Dimethylphenyl)-4-((*E*)-5-((1*R*,4*aS*,6*R*,8*aS*)-6-hydroxy-5,5,8*a*-trimethyl-2-methylenedecahydronaphthalen-1-yl)-3-methylpent-2-enoyl) piperazine-1-carboxamide (**15e**)

White powder solid, melt point: 119 °C, yield 89%, <sup>1</sup>H NMR (400 MHz, CDCl<sub>3</sub>) δ 6.96 (s, 2H), 6.75 (s, 1H), 6.67 (s, 1H), 5.72 (s, 1H), 4.85 (s, 1H), 4.50 (s, 1H), 3.69 – 3.59 (m, 2H), 3.53 – 3.39 (m, 6H), 3.21 (dd, *J* = 11.6, 4.4 Hz, 1H), 2.39 (ddd, *J* = 12.6, 4.2, 2.4 Hz, 1H), 2.27 – 2.18 (m, 1H), 2.24 (s, 6H), 1.97 – 1.89 (m, 2H), 1.87 (s, 3H), 1.78 – 1.47 (m, 7H), 1.37 (qd, *J* = 13.0, 4.2 Hz, 1H), 1.13 (td, *J* = 13.1, 3.8 Hz, 1H), 1.04 (dd, *J* = 12.5, 2.7 Hz, 1H), 0.97 (s, 3H), 0.75 (s, 3H), 0.67 (s, 3H). <sup>13</sup>C NMR (101 MHz, CDCl<sub>3</sub>) δ 167.64, 155.33, 151.22, 147.79, 138.67, 138.54, 125.20, 118.15, 116.72, 106.87, 78.73, 55.97, 54.72, 46.00, 44.40, 43.87, 40.93, 39.46, 39.18, 38.64, 38.23, 37.16, 28.40, 27.91, 24.05, 21.63, 21.45, 18.83, 15.51, 14.56. HRMS calc for C<sub>33</sub>H<sub>50</sub>N<sub>3</sub>O<sub>3</sub> [M+H]<sup>+</sup>: 536.3852, found 536.3853. HPLC purity: 100.00%, retention time: 15.820 min.

*N*-(4-Ethylphenyl)-4-((*E*)-5-((1*R*,4*aS*,6*R*,8*aS*)-6-hydroxy-5,5,8*a*-trimethyl-2-

methylenedecahydronaphthalen-1-yl)-3-methylpent-2-enoyl) piperazine-1-carboxamide (**15f**)

White solid, melt point: 184 °C, yield 90%, <sup>1</sup>H NMR (400 MHz, CDCl<sub>3</sub>) δ 7.23 (d, *J* = 8.4 Hz, 2H), 7.08 (d, *J* = 8.5 Hz, 2H), 6.85 (s, 1H), 5.71 (s, 1H), 4.85 (s, 1H), 4.50 (s, 1H), 3.69 – 3.59 (m, 2H), 3.53 – 3.39 (m, 6H), 3.21 (dd, *J* = 11.6, 4.4 Hz, 1H), 2.57 (q, *J* = 7.6 Hz, 2H), 2.39 (dd, *J* = 12.7, 2.4 Hz, 1H), 2.28 – 2.20 (m, 1H), 1.97 – 1.89 (m, 2H), 1.87 (s, 3H), 1.78 – 1.46 (m, 7H), 1.37 (qd, *J* = 13.1, 4.3 Hz, 1H), 1.18 (t, *J* = 7.6 Hz, 3H), 1.12 (td, *J* = 13.1, 3.8 Hz, 1H), 1.04 (dd, *J* = 12.4, 2.7 Hz, 1H), 0.97 (s, 3H), 0.75 (s, 3H), 0.67 (s, 3H). <sup>13</sup>C NMR (101 MHz, CDCl<sub>3</sub>) δ 167.64, 155.48, 151.18, 147.80, 139.51, 136.44, 128.25, 120.74, 116.74, 106.87, 78.72, 55.98, 54.72, 46.00, 44.35, 43.86, 40.93, 39.46, 39.19, 38.63, 38.23, 37.16, 28.40, 28.38, 28.28, 27.90, 24.05, 21.63, 18.84, 15.80, 15.53, 14.59. HRMS calc for C<sub>33</sub>H<sub>49</sub>N<sub>3</sub>O<sub>3</sub>Na [M+ Na]<sup>+</sup>: 558.3672, found 558.3669. HPLC purity: 100.00%, retention time: 15.873 min.

4-((*E*)-5-((1*R*,4*aS*,6*R*,8*aS*)-6-Hydroxy-5,5,8*a*-trimethyl-2-methylenedecahydronaphthalen-1-yl)-3-methylpent-2-enoyl)-*N*-phenethylpiperazine-1-carboxamide (**15g**)

Colorless oil, yield 89%, <sup>1</sup>H NMR (400 MHz, CDCl<sub>3</sub>) δ 7.29 (t, *J* = 6.6 Hz, 2H), 7.25 – 7.19 (m, 1H), 7.17 (d, *J* = 7.1 Hz, 2H), 5.70 (s, 1H), 4.85 (s, 1H), 4.50 (s, 1H), 3.68 – 3.54 (m, 2H), 3.52 – 3.42 (m, 4H), 3.41 – 3.32 (m, 2H), 3.30 – 3.18 (m, 3H), 2.81 (t, *J* = 6.9 Hz, 2H), 2.39 (ddd, *J* = 12.7, 4.3, 2.4 Hz, 1H), 2.28 – 2.19 (m, 1H), 1.99 – 1.88 (m, 2H), 1.87 (s, 3H), 1.78 – 1.45 (m, 7H), 1.37 (qd, *J* = 12.9, 4.2 Hz, 1H), 1.14 (td, *J* = 13.1, 3.8 Hz, 1H), 1.05 (dd, *J* = 12.5, 2.7 Hz, 1H), 0.97 (s, 3H), 0.75 (s, 3H), 0.67 (s, 3H). <sup>13</sup>C NMR (101 MHz, CDCl<sub>3</sub>) δ 167.63, 157.50, 151.12, 147.81, 139.26, 128.89, 128.70, 126.55, 116.77, 106.87, 78.75, 55.97, 54.72, 45.96, 43.86, 43.62, 42.16, 40.75, 39.47, 39.20, 38.64, 38.23, 37.16, 36.30, 28.40, 27.90, 24.06, 21.63, 18.81, 15.53, 14.59. HRMS calc for C<sub>33</sub>H<sub>50</sub>N<sub>3</sub>O<sub>3</sub> [M+H]<sup>+</sup>: 536.3852, found 536.3854. HPLC purity: 100.00%, retention time: 13.837 min.

4-((*E*)-5-((1*R*,4*aS*,6*R*,8*aS*)-6-Hydroxy-5,5,8*a*-trimethyl-2-methylenedecahydronaphthalen-1-yl)-3-methylpent-2-enoyl)-*N*-(2-isopropylphenyl)piperazine-1-carboxamide (**15h**)

Colorless oil, yield 87%, <sup>1</sup>H NMR (400 MHz, CDCl<sub>3</sub>) δ 7.42 – 7.36 (m, 1H), 7.27 – 7.24 (m, 1H), 7.17 – 7.11 (m, 2H), 6.38 (s, 1H), 5.72 (s, 1H), 4.86 (s, 1H), 4.51 (s, 1H), 3.71 – 3.61 (m, 2H), 3.54 – 3.40 (m, 6H), 3.22 (dd, *J* = 11.7, 4.4 Hz, 1H), 3.02 (p, *J* = 6.9 Hz, 1H), 2.40 (ddd, *J* = 12.7, 4.2, 2.3 Hz, 1H), 2.29 – 2.20 (m, 1H), 1.97 – 1.90 (m, 2H), 1.89 (s, 3H), 1.79 – 1.53 (m, 7H), 1.38 (qd, *J* = 12.9, 4.2 Hz, 1H), 1.22 (d, *J* = 6.8 Hz, 6H), 1.15 (td, 1H), 1.05 (dd, *J* = 12.5, 2.7 Hz, 1H), 0.97 (s, 3H), 0.75 (s, 3H), 0.68 (s, 3H). <sup>13</sup>C NMR (101 MHz, CDCl<sub>3</sub>) δ 167.59, 156.14, 151.32, 147.86, 141.38, 135.24, 126.40, 125.73, 125.45, 116.75, 106.86, 78.74, 56.02, 54.76, 45.94, 44.41, 44.03, 40.87, 39.50, 39.21, 38.72, 38.26, 37.20, 28.40, 28.12, 27.94, 24.08, 23.15, 21.69, 18.82, 15.51, 14.61. HRMS calc for C<sub>34</sub>H<sub>51</sub>N<sub>3</sub>O<sub>3</sub>Na [M +Na]<sup>+</sup>: 572.3828, found 572.3825.

HPLC purity: 100.00%, retention time: 15.267 min.

*N*-(4-Chlorophenyl)-4-((*E*)-5-((1*R*,4*aS*,6*R*,8*aS*)-6-hydroxy-5,5,8*a*-trimethyl-2-methylenedecahydronaphthalen-1-yl)-3-methylpent-2-enoyl) piperazine-1-carbothioamide (**15i**)

Colorless oil, yield 89%, <sup>1</sup>H NMR (400 MHz, CDCl<sub>3</sub>) δ 7.89 (s, 1H), 7.25 (d, *J* = 9.4 Hz, 2H), 7.12 (d, *J* = 8.6 Hz, 2H), 5.69 (s, 1H), 4.84 (s, 1H), 4.47 (s, 1H), 3.99 – 3.91 (m, 2H), 3.79 – 3.65 (m, 4H), 3.61 – 3.50 (m, 2H), 3.21 (dd, *J* = 11.6, 4.3 Hz, 1H), 2.38 (d, *J* = 13.0 Hz, 1H), 2.22 (t, *J* = 9.1 Hz, 1H), 1.95 – 1.88 (m, 2H), 1.86 (s, 3H), 1.75 – 1.49 (m, 7H), 1.36 (qd, *J* = 12.7, 3.8 Hz, 1H), 1.12 (td, *J* = 13.5, 3.9 Hz, 1H), 1.03 (dd, *J* = 12.5, 1.8 Hz, 1H), 0.95 (s, 3H), 0.73 (s, 3H), 0.66 (s, 3H). <sup>13</sup>C NMR (101 MHz, CDCl<sub>3</sub>) δ 167.71, 152.34, 147.71, 138.47, 130.90, 129.01, 125.74, 116.21, 106.85, 78.73, 55.92, 54.63, 48.81, 48.18, 45.30, 40.38, 39.42, 39.15, 38.72, 38.17, 37.12, 28.36, 27.84, 23.99, 21.63, 18.87, 15.51, 14.56. HRMS calc for C<sub>31</sub>H<sub>44</sub>ClN<sub>3</sub>O<sub>3</sub>K [M+K]<sup>+</sup>: 580.2708, found 580.2705. HPLC purity: 100.00%, retention time: 17.027 min.

*N*-(2-Chlorophenyl)-4-((*E*)-5-((1*R*,4*aS*,6*R*,8*aS*)-6-hydroxy-5,5,8*a*-trimethyl-2-methylenedecahydronaphthalen-1-yl)-3-methylpent-2-enoyl) piperazine-1-carboxamide (**15j**)

Colorless oil, yield 90%, <sup>1</sup>H NMR (400 MHz, CDCl<sub>3</sub>) δ 8.12 (dd, *J* = 8.3, 1.5 Hz, 1H), 7.32 (dd, *J* = 8.0, 1.5 Hz, 1H), 7.23 (td, *J* = 8.0, 1.5 Hz, 1H), 7.00 (s, 1H), 6.96 (td, *J* = 7.7, 1.6 Hz, 1H), 5.74 (s, 1H), 4.86 (s, 1H), 4.51 (s, 1H), 3.81 – 3.67 (m, 2H), 3.63 – 3.48 (m, 6H), 3.22 (dd, *J* = 11.7, 4.4 Hz, 1H), 2.40 (ddd, *J* = 12.8, 4.2, 2.4 Hz, 1H), 2.30 – 2.19 (m, 1H), 1.98 – 1.90 (m, 2H), 1.90 (s, 3H), 1.81 – 1.45 (m, 7H), 1.37 (qd, *J* = 12.9, 4.2 Hz, 1H), 1.14 (td, *J* = 13.1, 3.9 Hz, 1H), 1.05 (dd, *J* = 12.5, 2.7 Hz, 1H), 0.97 (s, 3H), 0.75 (s, 3H), 0.68 (s, 3H). <sup>13</sup>C NMR (101 MHz, CDCl<sub>3</sub>) δ 167.59, 154.13, 151.62, 147.82, 135.46, 128.90, 127.81, 123.62, 122.66, 121.23, 116.60, 106.87, 78.74, 55.97, 54.72, 45.81, 44.15, 43.87, 40.79, 39.48, 39.20, 38.71, 38.24, 37.16, 28.41, 27.92, 24.06, 21.65, 18.86, 15.51, 14.58. HRMS calc for C<sub>31</sub>H<sub>44</sub>ClN<sub>3</sub>O<sub>3</sub>Na [M + Na]<sup>+</sup>: 564.2969, found 564.2968. HPLC purity: 96.77%, retention time: 14.910 min.

*N*-(3-Chlorophenyl)-4-((*E*)-5-((1*R*,4*aS*,6*R*,8*aS*)-6-hydroxy-5,5,8*a*-trimethyl-2-methylenedecahydronaphthalen-1-yl)-3-methylpent-2-enoyl) piperazine-1-carboxamide (**15k**)

Colorless oil, yield 93%, <sup>1</sup>H NMR (400 MHz, CDCl<sub>3</sub>) δ 7.43 – 7.38 (m, 1H), 7.33 – 7.26 (m, 1H), 7.26 – 7.22 (m, 1H), 7.15 (t, *J* = 8.0 Hz, 1H), 7.01 – 6.93 (m, 1H), 5.72 (s, 1H), 4.85 (s, 1H), 4.49 (s, 1H), 3.72 – 3.60 (m, 2H), 3.56 – 3.41 (m, 6H), 3.21 (dd, *J* = 11.7, 4.3 Hz, 1H), 2.39 (ddd, *J* = 12.7, 4.2, 2.4 Hz, 1H), 2.30 – 2.18 (m, 1H), 1.96 – 1.89 (m, 2H), 1.86 (s, 3H), 1.77 – 1.45 (m, 7H), 1.37 (qd, *J* = 13.1, 4.3 Hz, 1H), 1.12 (td, *J* = 13.1, 3.9 Hz, 1H), 1.04 (dd, *J* = 12.5, 2.7 Hz, 1H), 0.97 (s, 3H), 0.75 (s, 3H), 0.67 (s, 3H). <sup>13</sup>C NMR (101 MHz, CDCl<sub>3</sub>) δ 167.77, 154.99, 151.44, 147.79, 140.43, 134.36, 129.87, 123.21, 120.28, 118.31, 116.64, 106.90, 78.77, 56.00, 54.74, 46.02,

44.41, 43.84, 40.99, 39.48, 39.20, 38.63, 38.24, 37.18, 28.42, 27.92, 24.05, 21.65, 18.90, 15.54, 14.59. HRMS calc for C<sub>31</sub>H<sub>44</sub>ClN<sub>3</sub>O<sub>3</sub>Na [M +Na]<sup>+</sup>: 564.2969, found 564.2966. HPLC purity: 98.76%, retention time: 16.310 min.

*N*-(2-Bromophenyl)-4-((*E*)-5-((1*R*,4*aS*,6*R*,8*aS*)-6-hydroxy-5,5,8*a*-trimethyl-2-methylenedecahydronaphthalen-1-yl)-3-methylpent-2-enoyl) piperazine-1-carboxamide (**15l**)

White solid, melt point: 199 °C, yield 90%, <sup>1</sup>H NMR (400 MHz, CDCl<sub>3</sub>) δ 8.11 (dd, *J* = 8.4, 1.6 Hz, 1H), 7.48 (dd, *J* = 8.0, 1.5 Hz, 1H), 7.27 (td, *J* = 15.7, 1.3 Hz, 1H), 7.02 (s, 1H), 6.89 (td, *J* = 8.0, 1.5 Hz, 1H), 5.73 (s, 1H), 4.85 (s, 1H), 4.50 (s, 1H), 3.78 – 3.67 (m, 2H), 3.61 – 3.47 (m, 6H), 3.21 (dd, *J* = 11.6, 4.4 Hz, 1H), 2.39 (ddd, *J* = 12.8, 4.2, 2.4 Hz, 1H), 2.25 (td, *J* = 11.0, 6.2 Hz, 1H), 2.01 – 1.90 (m, 2H), 1.89 (s, 3H), 1.79 – 1.51 (m, 7H), 1.37 (qd, *J* = 12.9, 4.2 Hz, 1H), 1.14 (td, *J* = 13.1, 3.9 Hz, 1H), 1.05 (dd, *J* = 12.5, 2.7 Hz, 1H), 0.97 (s, 3H), 0.75 (s, 3H), 0.67 (s, 3H). <sup>13</sup>C NMR (101 MHz, CDCl<sub>3</sub>) δ 167.56, 154.12, 151.60, 147.79, 136.51, 132.08, 128.45, 124.15, 121.44, 116.58, 113.55, 106.86, 78.69, 55.93, 54.68, 45.79, 44.12, 43.83, 40.76, 39.45, 39.18, 38.68, 38.21, 37.13, 28.39, 27.90, 24.03, 21.61, 18.85, 15.51, 14.57. HRMS calc for C<sub>31</sub>H<sub>44</sub>BrN<sub>3</sub>O<sub>3</sub>Na [M+Na]<sup>+</sup>: 610.2443, found 610.2454. HPLC purity: 99.20%, retention time: 15.273 min.

4-((*E*)-5-((1*R*,4*aS*,6*R*,8*aS*)-6-Hydroxy-5,5,8*a*-trimethyl-2-methylenedecahydronaphthalen-1-yl)-3-methylpent-2-enoyl)-*N*-(4-iodophenyl) piperazine-1-carboxamide (**15m**)

Colorless oil, yield 94%, <sup>1</sup>H NMR (400 MHz, CDCl<sub>3</sub>) δ 7.53 (d, *J* = 8.8 Hz, 1H), 7.14 (d, *J* = 8.7 Hz, 2H), 7.10 (s, 1H), 5.72 (s, 1H), 4.85 (s, 1H), 4.49 (s, 1H), 3.70 – 3.60 (m, 2H), 3.55 – 3.40 (m, 6H), 3.21 (dd, *J* = 11.7, 4.4 Hz, 1H), 2.39 (ddd, *J* = 12.8, 4.2, 2.3 Hz, 1H), 2.30 – 2.18 (m, 1H), 1.98 – 1.87 (m, 3H), 1.87 (s, 3H), 1.79 – 1.47 (m, 7H), 1.37 (qd, *J* = 13.0, 4.2 Hz, 1H), 1.13 (td, *J* = 13.1, 3.8 Hz, 1H), 1.04 (dd, *J* = 12.5, 2.7 Hz, 1H), 0.97 (s, 3H), 0.75 (s, 3H), 0.67 (s, 3H). <sup>13</sup>C NMR (101 MHz, CDCl<sub>3</sub>) δ 167.70, 154.75, 151.69, 147.87, 138.79, 137.90, 122.08, 116.65, 106.94, 86.39, 78.87, 56.07, 54.80, 45.99, 44.46, 43.84, 40.92, 39.55, 39.26, 38.77, 38.30, 37.24, 28.45, 28.01, 24.12, 21.73, 18.92, 15.54, 14.65. HRMS calc for C<sub>31</sub>H<sub>45</sub>IN<sub>3</sub>O<sub>3</sub> [M+H]<sup>+</sup>: 634.2506, found 634.2504. HPLC purity: 100.00%, retention time: 17.343 min.

*N*-(4-Cyanophenyl)-4-((*E*)-5-((1*R*,4*aS*,6*R*,8*aS*)-6-hydroxy-5,5,8*a*-trimethyl-2-methylenedecahydronaphthalen-1-yl)-3-methylpent-2-enoyl) piperazine-1-carboxamide (**15n**)

Colorless oil, yield 95%, <sup>1</sup>H NMR (400 MHz, CDCl<sub>3</sub>) δ 7.57 (s, 1H), 7.55 – 7.48 (m, 4H), 5.72 (s, 1H), 4.85 (s, 1H), 4.48 (s, 1H), 3.72 – 3.62 (m, 2H), 3.59 – 3.48 (m, 6H), 3.21 (dd, *J* = 11.6, 4.4 Hz, 1H), 2.39 (dt, *J* = 12.4, 3.2 Hz, 1H), 2.29 – 2.19 (m, 1H), 1.96 – 1.89 (m, 2H), 1.86 (s, 3H), 1.77 – 1.49 (m, 7H), 1.37 (qd, *J* = 13.0, 4.2 Hz, 1H), 1.12 (td, *J* = 13.1, 3.8 Hz, 1H), 1.04 (dd, *J* = 12.4, 2.7 Hz, 1H), 0.96 (s, 3H), 0.75 (s,

3H), 0.66 (s, 3H). <sup>13</sup>C NMR (101 MHz, CDCl<sub>3</sub>) δ 167.76, 154.38, 151.73, 147.78, 143.88, 133.09, 119.51, 119.34, 116.51, 106.86, 105.33, 78.75, 56.03, 54.75, 46.00, 44.51, 43.83, 40.98, 39.48, 39.20, 38.68, 38.22, 37.20, 28.41, 27.91, 24.05, 21.70, 18.88, 15.51, 14.58. HRMS calc for C<sub>32</sub>H<sub>45</sub>N<sub>4</sub>O<sub>3</sub> [M+H]<sup>+</sup>: 533.3492, found 533.3489. HPLC purity: 100.00%, retention time: 13.930 min.

4-((*E*)-5-((1*R*,4*aS*,6*R*,8*aS*)-6-Hydroxy-5,5,8*a*-trimethyl-2-methylenedecahydronaphthalen-1-yl)-3-methylpent-2-enoyl)-*N*-(2-nitrophenyl)piperazine-1-carboxamide (**15o**)

Yellow oil, yield 92%, <sup>1</sup>H NMR (400 MHz, CDCl<sub>3</sub>) δ 10.22 (s, 1H), 8.59 (dd, *J* = 8.7, 1.3 Hz, 1H), 8.18 (dd, *J* = 8.5, 1.6 Hz, 1H), 7.60 (ddd, *J* = 8.8, 7.2, 1.6 Hz, 1H), 7.07 (ddd, *J* = 8.5, 7.2, 1.3 Hz, 1H), 5.74 (s, 1H), 4.86 (s, 1H), 4.51 (s, 1H), 3.79 – 3.67 (m, 2H), 3.65 – 3.55 (m, 6H), 3.23 (dd, *J* = 11.7, 4.4 Hz, 1H), 2.40 (ddd, *J* = 12.7, 4.2, 2.3 Hz, 1H), 2.32 – 2.20 (m, 1H), 1.99 – 1.91 (m, 2H), 1.90 (s, 3H), 1.80 – 1.54 (m, 7H), 1.38 (qd, *J* = 13.0, 4.3 Hz, 1H), 1.15 (td, *J* = 13.2, 3.9 Hz, 1H), 1.06 (dd, *J* = 12.5, 2.8 Hz, 1H), 0.98 (s, 3H), 0.76 (s, 3H), 0.68 (s, 3H). <sup>13</sup>C NMR (101 MHz, CDCl<sub>3</sub>) δ 167.59, 153.62, 151.73, 147.82, 137.01, 136.20, 135.80, 125.89, 121.90, 121.54, 116.59, 106.91, 78.77, 56.01, 54.77, 45.76, 43.93, 41.82, 40.97, 39.51, 39.22, 38.73, 38.26, 37.20, 28.42, 27.95, 24.08, 21.67, 18.89, 15.51, 14.60. HRMS calc for C<sub>31</sub>H<sub>45</sub>N<sub>4</sub>O<sub>5</sub> [M+H]<sup>+</sup>: 553.3390, found 553.3392. HPLC purity: 100.00%, retention time: 15.457 min.

4-((*E*)-5-((1*R*,4*aS*,6*R*,8*aS*)-6-Hydroxy-5,5,8*a*-trimethyl-2-methylenedecahydronaphthalen-1-yl)-3-methylpent-2-enoyl)-*N*-(3-methoxyphenyl)piperazine-1-carboxamide (**15p**)

Colorless oil, yield 90%, <sup>1</sup>H NMR (400 MHz, CDCl<sub>3</sub>) δ 7.13 (t, *J* = 8.1 Hz, 1H), 7.08 – 7.01 (m, 2H), 6.84 (ddd, *J* = 8.1, 2.0, 0.9 Hz, 1H), 6.56 (ddd, *J* = 8.3, 2.5, 0.8 Hz, 1H), 5.70 (s, 1H), 4.85 (s, 1H), 4.49 (s, 1H), 3.74 (s, 3H), 3.68 – 3.58 (m, 2H), 3.53 – 3.38 (m, 6H), 3.21 (dd, *J* = 11.6, 4.4 Hz, 1H), 2.39 (ddd, *J* = 12.8, 4.2, 2.4 Hz, 1H), 2.24 (td, *J* = 10.7, 5.7 Hz, 1H), 2.00 – 1.88 (m, 2H), 1.87 (s, 3H), 1.80 – 1.47 (m, 7H), 1.37 (qd, *J* = 12.9, 4.2 Hz, 1H), 1.12 (td, *J* = 13.1, 3.8 Hz, 1H), 1.04 (dd, *J* = 12.5, 2.7 Hz, 1H), 0.96 (s, 3H), 0.74 (s, 3H), 0.66 (s, 3H). <sup>13</sup>C NMR (101 MHz, CDCl<sub>3</sub>) δ 167.71, 160.14, 155.26, 151.29, 147.78, 140.27, 129.54, 116.68, 112.48, 109.08, 106.86, 106.09, 78.73, 55.96, 55.30, 54.71, 45.99, 44.37, 43.86, 40.96, 39.45, 39.17, 38.61, 38.21, 37.15, 28.37, 27.87, 24.03, 21.62, 18.84, 15.52, 14.57. HRMS calc for C<sub>32</sub>H<sub>47</sub>N<sub>3</sub>O<sub>4</sub>K [M+K]<sup>+</sup>: 576.3204, found 576.3201. HPLC purity: 99.22%, retention time: 13.760 min

4-((*E*)-5-((1*R*,4*aS*,6*R*,8*aS*)-6-Hydroxy-5,5,8*a*-trimethyl-2-methylenedecahydronaphthalen-1-yl)-3-methylpent-2-enoyl)-*N*-(4-methoxybenzyl)piperazine-1-carboxamide (**15q**)

Colorless oil, yield 85%, <sup>1</sup>H NMR (400 MHz, CDCl<sub>3</sub>) δ 7.19 (d, *J* = 8.5 Hz, 2H), 6.82 (d, *J* = 8.6 Hz, 2H), 5.69 (s, 1H), 5.05 (t, *J* = 5.4 Hz, 1H), 4.84 (s, 1H), 4.49 (s, 1H),

4.31 (d,  $J = 5.2$  Hz, 2H), 3.76 (s, 3H), 3.65 – 3.56 (m, 2H), 3.49 – 3.37 (m, 4H), 3.35 – 3.27 (m, 2H), 3.20 (dd,  $J = 11.7, 4.4$  Hz, 1H), 2.38 (ddd,  $J = 12.7, 4.3, 2.4$  Hz, 1H), 2.22 (ddd,  $J = 13.7, 10.2, 3.6$  Hz, 1H), 1.96 – 1.86 (m, 2H), 1.85 (s, 3H), 1.77 – 1.45 (m, 7H), 1.36 (qd,  $J = 13.0, 4.3$  Hz, 1H), 1.12 (td,  $J = 13.0, 3.8$  Hz, 1H), 1.03 (dd,  $J = 12.4, 2.7$  Hz, 1H), 0.95 (s, 3H), 0.74 (s, 3H), 0.66 (s, 3H).  $^{13}\text{C}$  NMR (101 MHz,  $\text{CDCl}_3$ )  $\delta$  167.65, 158.94, 157.49, 151.06, 147.76, 131.24, 129.18, 116.71, 114.02, 106.84, 78.69, 55.90, 55.35, 54.66, 45.95, 44.52, 43.88, 43.66, 40.81, 39.42, 39.15, 38.56, 38.18, 37.11, 28.36, 27.82, 24.00, 21.57, 18.78, 15.49, 14.55. HRMS calc for  $\text{C}_{33}\text{H}_{50}\text{N}_3\text{O}_4$   $[\text{M}+\text{H}]^+$ : 552.3801, found 552.3802. HPLC purity: 98.39%, retention time: 12.950 min.

*N*-(4-Acetylphenyl)-4-((*E*)-5-((1*R*,4*aS*,6*R*,8*aS*)-6-hydroxy-5,5,8*a*-trimethyl-2-methylenedecahydronaphthalen-1-yl)-3-methylpent-2-enoyl) piperazine-1-carboxamide (**15r**)

White powder solid, melt point: 189 °C, yield 86%,  $^1\text{H}$  NMR (400 MHz,  $\text{CDCl}_3$ )  $\delta$  7.83 (d,  $J = 8.8$  Hz, 2H), 7.77 (s, 1H), 7.47 (d,  $J = 8.8$  Hz, 2H), 5.71 (s, 1H), 4.83 (s, 1H), 4.47 (s, 1H), 3.70 – 3.60 (m, 2H), 3.57 – 3.48 (m, 6H), 3.20 (dd,  $J = 11.6, 4.4$  Hz, 1H), 2.52 (s, 3H), 2.37 (dt,  $J = 12.8, 2.6$  Hz, 1H), 2.28 – 2.16 (m, 1H), 1.95 – 1.86 (m, 2H), 1.85 (s, 3H), 1.76 – 1.44 (m, 7H), 1.35 (qd,  $J = 13.0, 4.2$  Hz, 1H), 1.11 (td,  $J = 13.0, 3.6$  Hz, 1H), 1.02 (dd,  $J = 12.5, 2.7$  Hz, 1H), 0.95 (s, 3H), 0.73 (s, 3H), 0.65 (s, 3H).  $^{13}\text{C}$  NMR (101 MHz,  $\text{CDCl}_3$ )  $\delta$  197.50, 167.79, 154.72, 151.60, 147.73, 144.20, 131.54, 129.69, 118.83, 116.50, 106.85, 78.73, 55.93, 54.67, 46.01, 44.50, 43.88, 41.05, 39.42, 39.15, 38.59, 38.18, 37.13, 28.36, 27.81, 26.48, 24.00, 21.60, 18.87, 15.50, 14.55. HRMS calc for  $\text{C}_{33}\text{H}_{47}\text{N}_3\text{O}_4\text{Na}$   $[\text{M}+\text{Na}]^+$ : 572.3464, found 572.3463. HPLC purity: 99.40%, retention time: 12.800 min.

4-((*E*)-5-((1*R*,4*aS*,6*R*,8*aS*)-6-Hydroxy-5,5,8*a*-trimethyl-2-methylenedecahydronaphthalen-1-yl)-3-methylpent-2-enoyl)-*N*-(3-(trifluoromethoxy)phenyl) piperazine-1-carboxamide (**15s**)

Colorless oil, yield 97%,  $^1\text{H}$  NMR (400 MHz,  $\text{CDCl}_3$ )  $\delta$  7.38 (s, 1H), 7.33 – 7.24 (m, 3H), 6.88 (d,  $J = 7.7$  Hz, 1H), 5.74 (s, 1H), 4.88 (s, 1H), 4.52 (s, 1H), 3.73 – 3.63 (m, 2H), 3.59 – 3.46 (m, 6H), 3.24 (dd,  $J = 11.7, 4.3$  Hz, 1H), 2.42 (dt,  $J = 13.3, 3.1$  Hz, 1H), 2.32 – 2.21 (m, 1H), 2.00 – 1.90 (m, 3H), 1.89 (s, 3H), 1.82 – 1.50 (m, 7H), 1.40 (qd,  $J = 13.1, 4.3$  Hz, 1H), 1.16 (td,  $J = 13.1, 3.8$  Hz, 1H), 1.07 (dd,  $J = 12.5, 2.7$  Hz, 1H), 0.99 (s, 3H), 0.78 (s, 3H), 0.70 (s, 3H).  $^{13}\text{C}$  NMR (101 MHz,  $\text{CDCl}_3$ )  $\delta$  167.76, 154.85, 151.56, 149.61, 147.83, 140.70, 129.87, 120.54 (q,  $J = 257.2$  Hz), 118.14, 116.61, 115.28, 112.77, 106.88, 78.81, 56.06, 54.78, 46.00, 44.44, 43.83, 40.98, 39.50, 39.22, 38.68, 38.26, 37.20, 28.40, 27.95, 24.08, 21.69, 18.84, 15.50, 14.58. HRMS calc for  $\text{C}_{32}\text{H}_{44}\text{F}_3\text{N}_3\text{O}_4\text{Na}$   $[\text{M}+\text{Na}]^+$ : 614.3182, found 614.3184. HPLC purity: 100.00%, retention time: 6.043 min.  $^{19}\text{F}$  NMR (377 MHz,  $\text{CDCl}_3$ )  $\delta$  -57.72.

*N*-(2-(1*H*-Indol-3-yl) ethyl)-4-((*E*)-5-((1*R*,4*aS*,6*R*,8*aS*)-6-hydroxy-5,5,8*a*-trimethyl-2-methylenedecahydronaphthalen-1-yl)-3-methylpent-2-enoyl) piperazine-1-

carboxamide(**15t**)

Colorless oil, yield 84%,  $^1\text{H}$  NMR (400 MHz,  $\text{CDCl}_3$ )  $\delta$  8.37 (s, 1H), 7.60 (d,  $J = 7.9$  Hz, 1H), 7.37 (d,  $J = 8.1$  Hz, 1H), 7.23 – 7.15 (m, 1H), 7.15 – 7.06 (m, 1H), 7.03 (d,  $J = 2.2$  Hz, 1H), 5.70 (s, 1H), 4.86 (s, 1H), 4.58 (t,  $J = 5.5$  Hz, 1H), 4.51 (s, 1H), 3.63 – 3.52 (m, 4H), 3.50 – 3.40 (m, 2H), 3.39 – 3.30 (m, 2H), 3.27 – 3.16 (m, 3H), 2.99 (t,  $J = 6.5$  Hz, 2H), 2.45 – 2.36 (m, 1H), 2.30 – 2.19 (m, 1H), 1.99 – 1.88 (m, 2H), 1.88 (s, 3H), 1.80 – 1.55 (m, 7H), 1.39 (qd,  $J = 13.0, 4.3$  Hz, 1H), 1.13 (td,  $J = 13.2, 6.6$  Hz, 1H), 1.05 (dd,  $J = 12.6, 2.7$  Hz, 1H), 0.99 (s, 3H), 0.77 (s, 3H), 0.69 (s, 3H).  $^{13}\text{C}$  NMR (101 MHz,  $\text{CDCl}_3$ )  $\delta$  167.65, 157.60, 151.01, 147.85, 136.58, 127.62, 122.34, 122.16, 119.55, 118.86, 116.95, 113.43, 111.47, 106.96, 78.89, 56.01, 54.82, 46.02, 43.85, 43.59, 41.59, 40.81, 39.53, 39.26, 38.65, 38.31, 37.24, 28.47, 28.01, 25.80, 24.12, 21.68, 18.86, 15.55, 14.64. HRMS calc for  $\text{C}_{35}\text{H}_{51}\text{N}_4\text{O}_3$   $[\text{M}+\text{H}]^+$ : 575.3961, found 575.3963. HPLC purity: 97.12%, retention time: 13.997 min.

*N,N'*-(1,4-Phenylene) bis(4-((*E*)-5-((1*R*,4*aS*,6*R*,8*aS*)-6-hydroxy-5,5,8*a*-trimethyl-2-methylenedecahydronaphthalen-1-yl)-3-methylpent-2-enoyl) piperazine-1-carboxamide) (**15u**)

White power solid, melt point: 190 °C, yield 96%,  $^1\text{H}$  NMR (400 MHz,  $\text{DMSO}-d_6$ )  $\delta$  8.45 (s, 2H), 7.30 (s, 4H), 5.84 (s, 2H), 4.86 (s, 2H), 4.54 (s, 2H), 4.40 – 4.34 (m, 2H), 3.55 – 3.40 (m, 16H), 3.05 (d,  $J = 10.9$  Hz, 2H), 2.42 – 2.34 (m, 2H), 2.22 – 2.11 (m, 2H), 1.98 – 1.86 (m, 4H), 1.82 (s, 6H), 1.77 – 1.45 (m, 14H), 1.32 (qd,  $J = 12.8, 4.0$  Hz, 2H), 1.12 (td,  $J = 13.0, 4.2$  Hz, 2H), 1.05 (dd,  $J = 12.7, 2.5$  Hz, 2H), 0.91 (s, 6H), 0.67 (s, 6H), 0.64 (s, 6H).  $^{13}\text{C}$  NMR (101 MHz,  $\text{DMSO}-d_6$ )  $\delta$  166.64, 155.57, 149.50, 148.24, 135.22, 120.63, 118.05, 107.09, 77.17, 55.73, 54.58, 49.44, 45.93, 44.41, 40.40, 39.56, 39.24, 38.43, 38.17, 37.07, 28.86, 28.15, 24.14, 21.64, 18.71, 16.25, 14.80. HRMS calc for  $\text{C}_{56}\text{H}_{85}\text{N}_6\text{O}_6$   $[\text{M}+\text{H}]^+$ : 937.6531, found 937.6528. HPLC purity: 100.00%, retention time: 17.500 min.

*N,N'*-(1,3-Phenylene)bis(4-((*E*)-5-((1*R*,4*aS*,6*R*,8*aS*)-6-hydroxy-5,5,8*a*-trimethyl-2-methylenedecahydronaphthalen-1-yl)-3-methylpent-2-enoyl)piperazine-1-carboxamide) (**15v**)

Light yellow oil, yield 91%,  $^1\text{H}$  NMR (400 MHz,  $\text{CDCl}_3$ )  $\delta$  7.50 (s, 1H), 7.28 (s, 2H), 7.10 (t,  $J = 8.1$  Hz, 1H), 6.95 (d,  $J = 8.2$  Hz, 2H), 5.71 (s, 2H), 4.86 (s, 2H), 4.51 (s, 2H), 3.63 – 3.53 (m, 4H), 3.52 – 3.31 (m, 12H), 3.21 (dd,  $J = 11.5, 4.4$  Hz, 2H), 2.44 – 2.36 (m, 2H), 2.29 – 2.19 (m, 2H), 1.98 – 1.88 (m, 4H), 1.87 (s, 6H), 1.80 – 1.48 (m, 14H), 1.37 (qd,  $J = 12.9, 4.1$  Hz, 2H), 1.12 (td,  $J = 13.4, 3.5$  Hz, 2H), 1.04 (dd,  $J = 12.5, 2.7$  Hz, 2H), 0.97 (s, 6H), 0.75 (s, 6H), 0.67 (s, 6H).  $^{13}\text{C}$  NMR (101 MHz,  $\text{CDCl}_3$ )  $\delta$  167.71, 155.53, 151.23, 147.79, 139.58, 129.01, 116.88, 116.01, 114.01, 106.96, 78.74, 55.93, 54.82, 46.04, 44.22, 43.86, 41.01, 39.49, 39.23, 38.59, 38.29, 37.25, 28.47, 27.94, 24.09, 21.62, 18.91, 15.58, 14.65. HRMS calc for  $\text{C}_{56}\text{H}_{85}\text{N}_6\text{O}_6$   $[\text{M}+\text{H}]^+$ : 937.6531, found 937.6530. HPLC purity: 99.45%, retention time: 4.390 min.

*N,N'*-(1,3-Phenylenebis(methylene)) bis(4-((*E*)-5-((1*R*,4*aS*,6*R*,8*aS*)-6-hydroxy-5,5,8a-trimethyl-2-methylenedecahydronaphthalen-1-yl)-3-methylpent-2-enoyl) piperazine-1-carboxamide) (**15w**)

Colorless oil, yield 93%, <sup>1</sup>H NMR (400 MHz, CDCl<sub>3</sub>) δ 7.29 – 7.24 (m, 1H), 7.20 – 7.14 (m, 3H), 5.71 (s, 2H), 5.28 (d, *J* = 6.8 Hz, 2H), 4.86 (s, 2H), 4.51 (s, 2H), 4.36 (d, *J* = 5.7 Hz, 4H), 3.66 – 3.55 (m, 4H), 3.52 – 3.31 (m, 12H), 3.22 (dd, *J* = 11.7, 4.4 Hz, 2H), 2.44 – 2.35 (m, 2H), 2.29 – 2.19 (m, 2H), 1.98 – 1.88 (m, 4H), 1.87 (s, 6H), 1.78 – 1.53 (m, 14H), 1.38 (qd, *J* = 12.8, 4.0 Hz, 2H), 1.14 (td, *J* = 12.9, 2.8 Hz, 2H), 1.06 (dd, *J* = 11.6, 1.2 Hz, 2H), 0.98 (s, 6H), 0.76 (s, 6H), 0.68 (s, 6H). <sup>13</sup>C NMR (101 MHz, CDCl<sub>3</sub>) δ 167.64, 157.70, 151.22, 147.85, 139.87, 129.04, 127.00, 126.67, 116.86, 106.95, 78.82, 56.02, 54.83, 46.02, 44.93, 43.99, 43.87, 40.96, 39.53, 39.26, 38.69, 38.31, 37.25, 28.45, 27.99, 24.11, 21.69, 18.86, 15.55, 14.64. HRMS calc for C<sub>58</sub>H<sub>89</sub>N<sub>6</sub>O<sub>6</sub> [M+H]<sup>+</sup>: 965.6844, found 965.6841. HPLC purity: 98.75%, retention time: 17.390 min.

*N,N'*-(Naphthalene-1,5-diyl)bis(4-((*E*)-5-((1*R*,4*aS*,6*R*,8*aS*)-6-hydroxy-5,5,8a-trimethyl-2-methylenedecahydronaphthalen-1-yl)-3-methylpent-2-enoyl)piperazine-1-carboxamide) (**15x**)

Colorless oil, yield 96%, <sup>1</sup>H NMR (400 MHz, CDCl<sub>3</sub>) δ 7.84 (s, 2H), 7.60 – 7.52 (m, 2H), 7.37 – 7.29 (m, 2H), 7.30 – 7.24 (m, 2H), 5.66 (s, 2H), 4.85 (s, 2H), 4.50 (s, 2H), 3.32 – 3.14 (m, 14H), 3.07 – 2.92 (m, 4H), 2.39 (d, *J* = 13.6 Hz, 2H), 2.26 – 2.18 (m, 2H), 1.97 – 1.86 (m, 4H), 1.85 (s, 6H), 1.78 – 1.50 (m, 14H), 1.37 (qd, *J* = 12.8, 3.9 Hz, 2H), 1.13 (td, *J* = 10.7, 6.9 Hz, 2H), 1.03 (dd, *J* = 12.3, 2.4 Hz, 3H), 0.95 (s, 6H), 0.74 (s, 6H), 0.67 (s, 6H). <sup>13</sup>C NMR (101 MHz, CDCl<sub>3</sub>) δ 167.48, 156.66, 150.63, 147.75, 134.82, 130.84, 125.37, 123.85, 121.05, 116.96, 106.81, 78.53, 55.95, 54.73, 45.89, 43.79, 43.60, 40.80, 39.41, 39.12, 38.53, 38.20, 37.18, 28.36, 27.85, 24.01, 21.63, 18.77, 15.49, 14.56. HRMS calc for C<sub>60</sub>H<sub>86</sub>N<sub>6</sub>O<sub>6</sub>Na [M+Na]<sup>+</sup>: 1009.6507, found 1009.6505. HPLC purity: 97.51%, retention time: 17.890 min.

**<sup>1</sup>H NMR, <sup>13</sup>C NMR, HRMS, <sup>19</sup>F NMR and HPLC spectra of synthetic compounds**

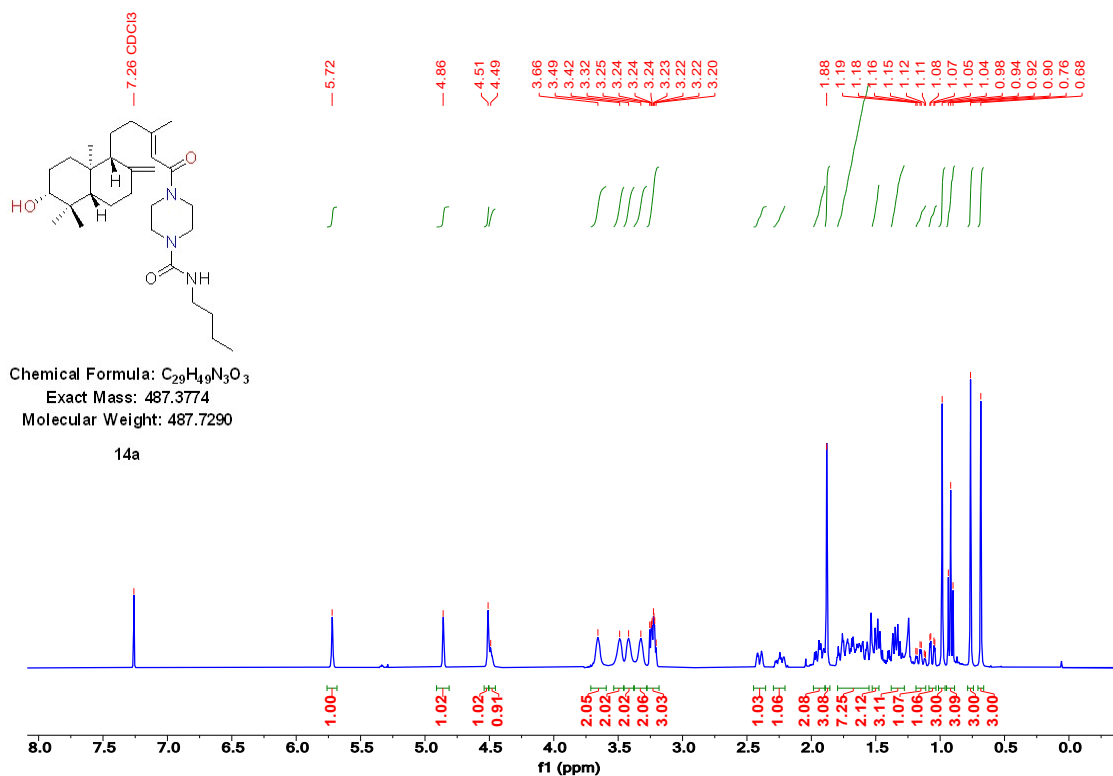

Figure S1.  $^1H$  NMR spectrum of 14a

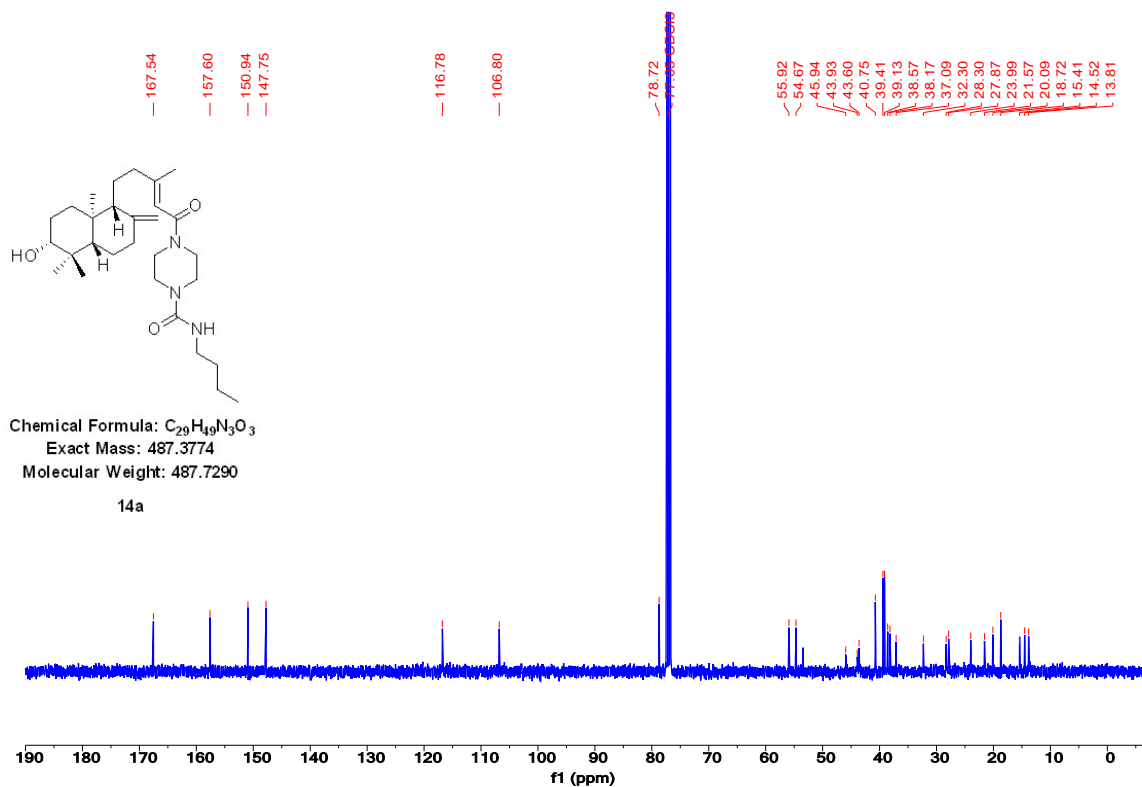

Figure S2.  $^{13}C$  NMR spectrum of 14a

### Single Mass Analysis

Tolerance = 5.0 mDa / DBE: min = -1.5, max = 50.0

Element prediction: Off

Number of isotope peaks used for i-FIT = 3

Monoisotopic Mass, Even Electron Ions

16 formula(e) evaluated with 1 results within limits (up to 50 best isotopic matches for each mass)

Elements Used:

C: 29-56 H: 47-85 N: 2-6 O: 2-6

7

250310-2-Q-21 21 (0.065)

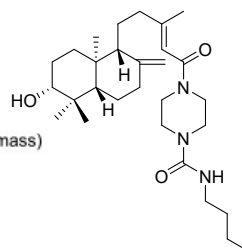

1: TOF MS ES+  
2.39e+005

Chemical Formula: C<sub>29</sub>H<sub>49</sub>N<sub>3</sub>O<sub>3</sub>

Exact Mass: 487.3774

Molecular Weight: 487.7290

14a

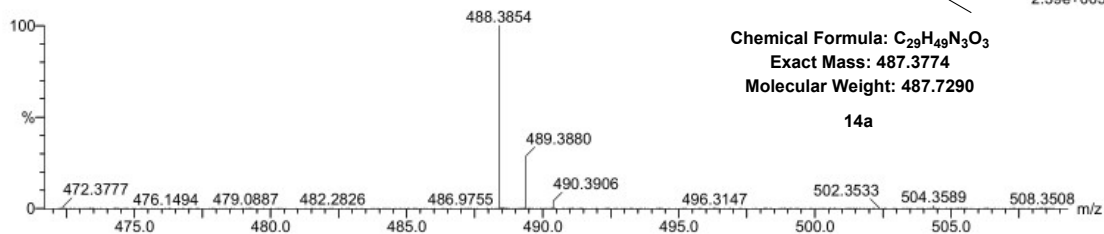

Minimum: -1.5  
Maximum: 5.0 10.0 50.0

| Mass     | Calc. Mass | mDa | PPM | DBE | i-FIT | Norm | Conf (%) | Formula                                                       |
|----------|------------|-----|-----|-----|-------|------|----------|---------------------------------------------------------------|
| 488.3854 | 488.3852   | 0.2 | 0.4 | 6.5 | 475.7 | n/a  | n/a      | C <sub>29</sub> H <sub>50</sub> N <sub>3</sub> O <sub>3</sub> |

Figure S3. HRMS spectrum of 14a

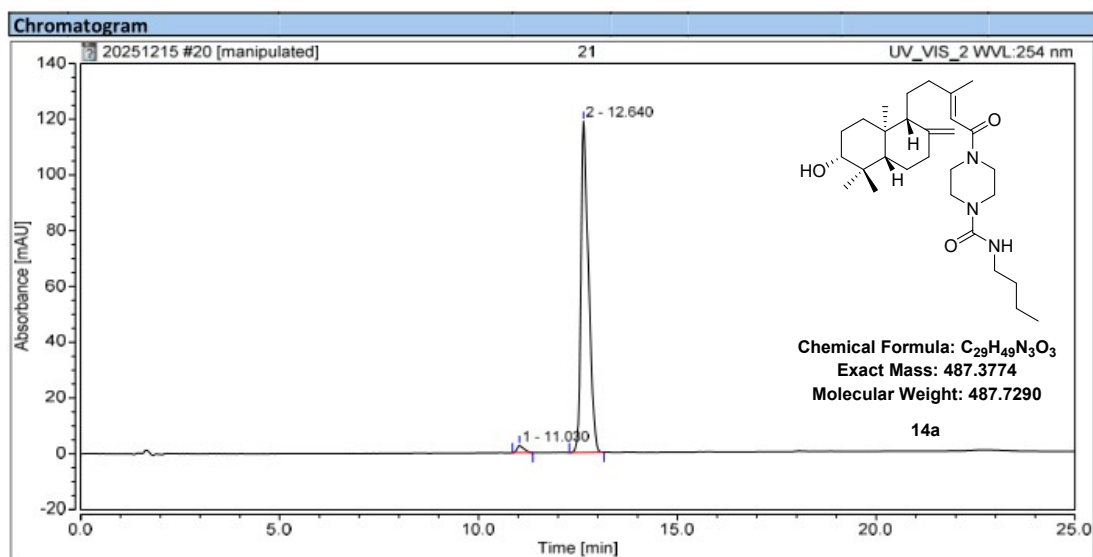

| Integration Results |           |                       |                 |               |                    |                      |        |
|---------------------|-----------|-----------------------|-----------------|---------------|--------------------|----------------------|--------|
| No.                 | Peak Name | Retention Time<br>min | Area<br>mAU*min | Height<br>mAU | Relative Area<br>% | Relative Height<br>% | Amount |
| 1                   |           | 11.030                | 0.525           | 2.598         | 1.97               | 2.14                 | n.a.   |
| 2                   |           | 12.640                | 26.063          | 118.781       | 98.03              | 97.86                | n.a.   |
| Total:              |           |                       | 26.588          | 121.379       | 100.00             | 100.00               |        |

Figure S4. HPLC spectrum of 14a

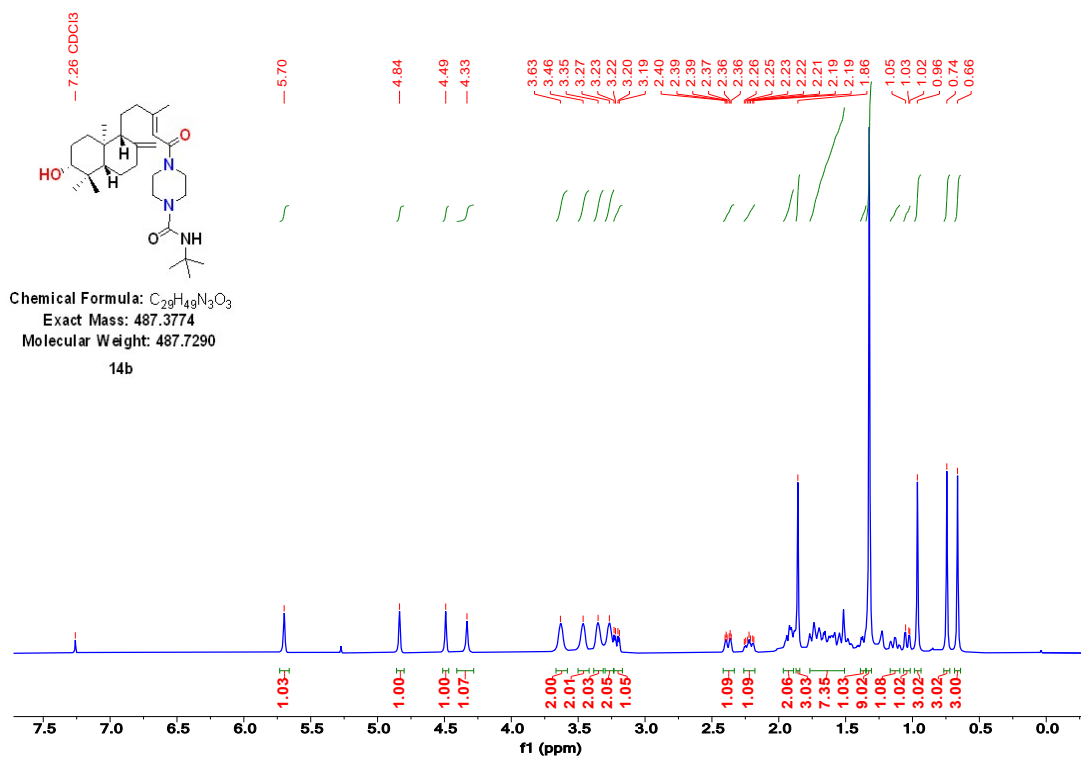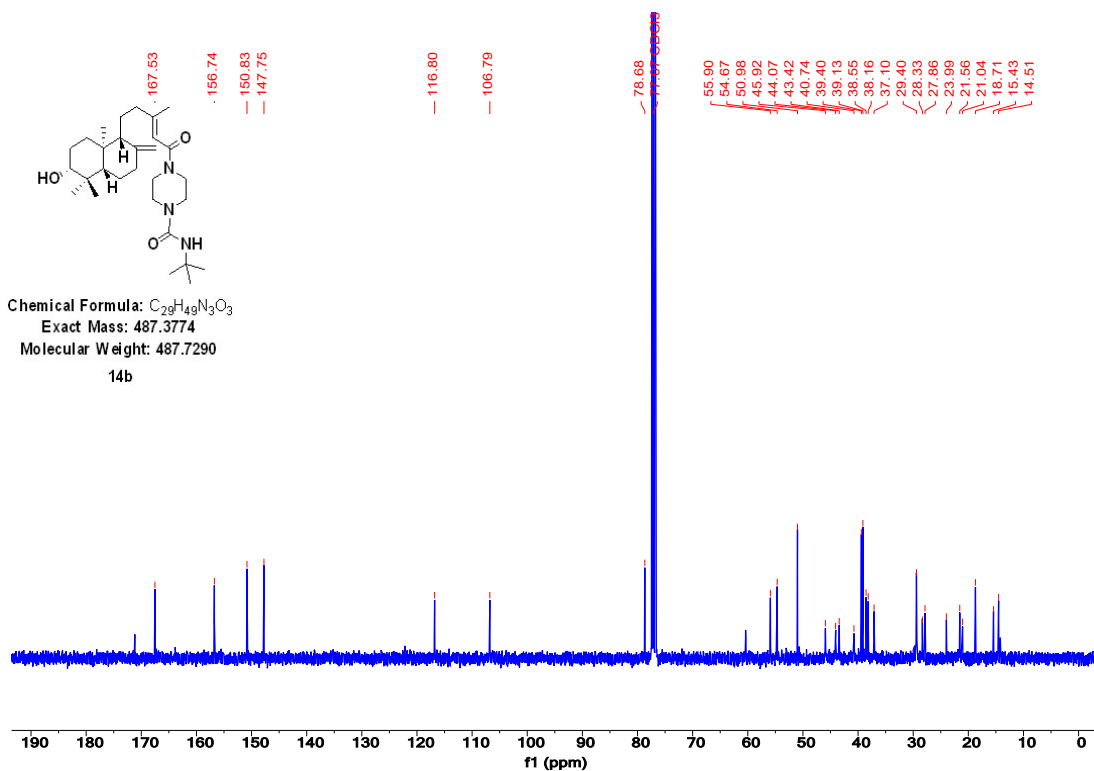

### Single Mass Analysis

Tolerance = 5.0 mDa / DBE: min = -1.5, max = 50.0

Element prediction: Off

Number of isotope peaks used for i-FIT = 3

Monoisotopic Mass, Even Electron Ions

9 formula(e) evaluated with 1 results within limits (up to 50 best isotopic matches for each mass)

Elements Used:

C: 27-33 H: 44-51 N: 2-5 O: 2-5

7

250310-2-Q-14 32 (0.086)

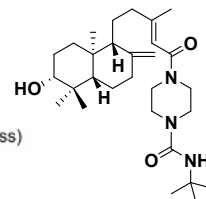

Chemical Formula:  $C_{29}H_{49}N_3O_3$

Exact Mass: 487.3774

Molecular Weight: 487.7290

14b

1: TOF MS ES+  
5.66e+005

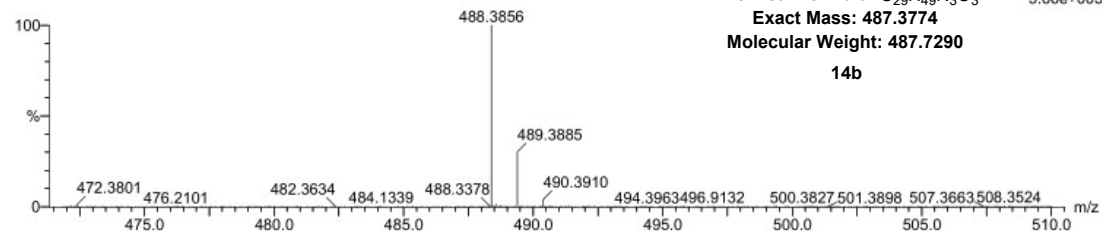

Minimum: -1.5  
Maximum: 5.0 10.0 50.0

| Mass     | Calc. Mass | mDa | PPM | DBE | i-FIT | Norm | Conf (%) | Formula       |
|----------|------------|-----|-----|-----|-------|------|----------|---------------|
| 488.3856 | 488.3852   | 0.4 | 0.8 | 6.5 | 612.9 | n/a  | n/a      | C29 H50 N3 O3 |

Figure S7. HRMS spectrum of 14b

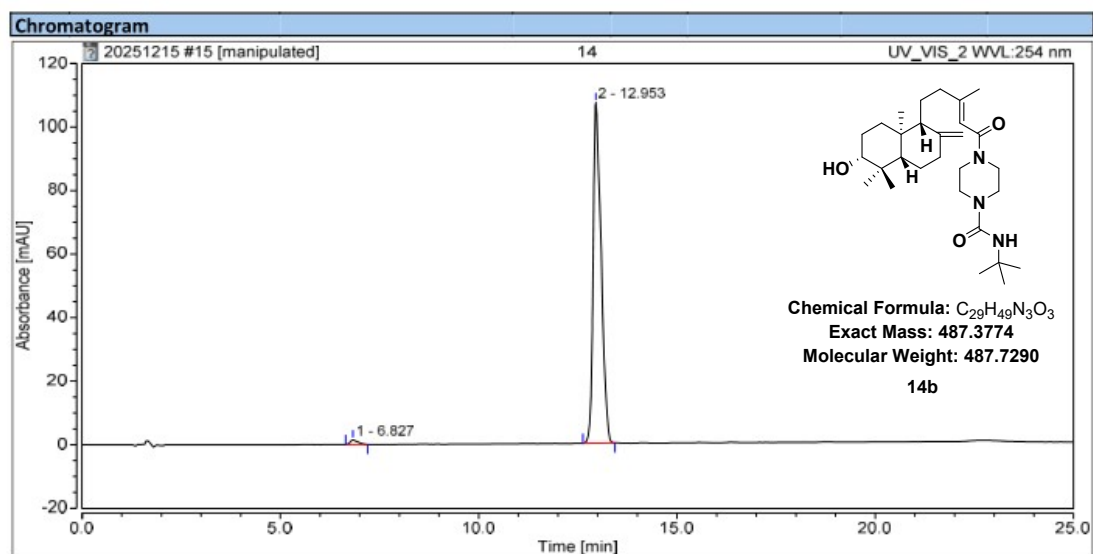

| Integration Results |           |                       |                 |               |                    |                      |        |
|---------------------|-----------|-----------------------|-----------------|---------------|--------------------|----------------------|--------|
| No.                 | Peak Name | Retention Time<br>min | Area<br>mAU*min | Height<br>mAU | Relative Area<br>% | Relative Height<br>% | Amount |
| 1                   |           | 6.827                 | 0.322           | 1.453         | 1.29               | 1.34                 | n.a.   |
| 2                   |           | 12.953                | 24.750          | 107.268       | 98.71              | 98.66                | n.a.   |
| Total:              |           |                       | 25.073          | 108.721       | 100.00             | 100.00               |        |

Figure S8. HPLC spectrum of 14b

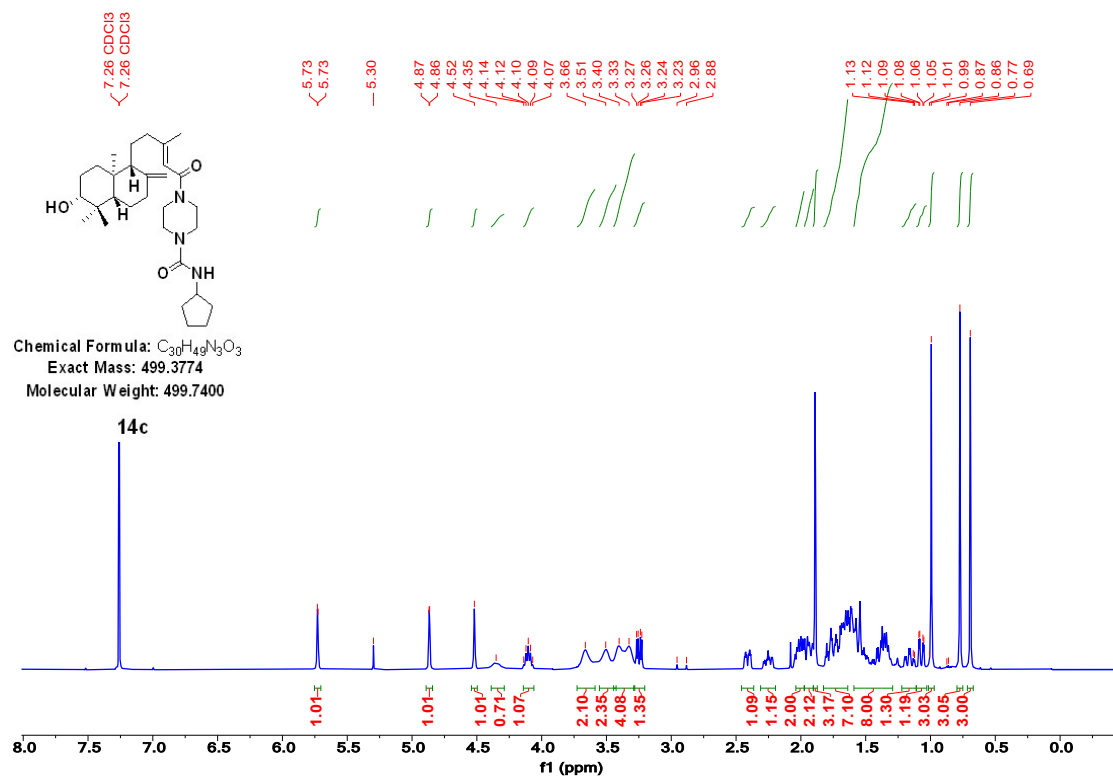

Figure S9.  $^1H$  NMR spectrum of **14c**

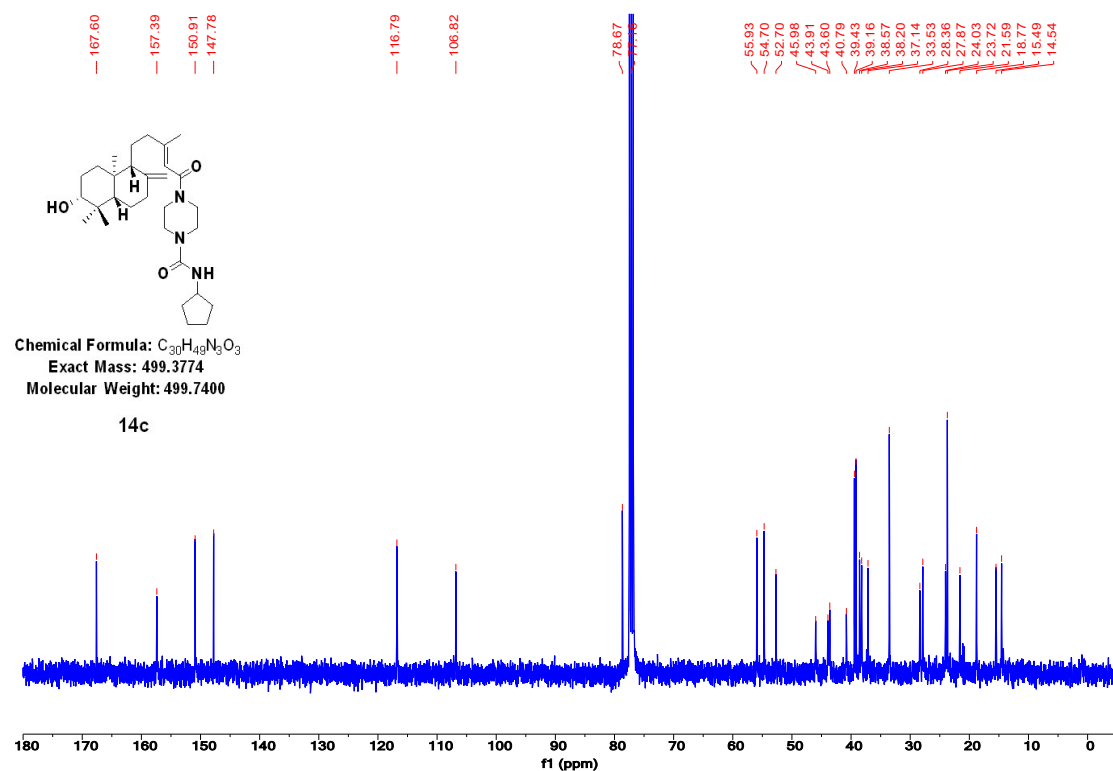

Figure S10.  $^{13}C$  NMR spectrum of **14c**

### Single Mass Analysis

Tolerance = 5.0 mDa / DBE: min = -1.5, max = 50.0

Element prediction: Off

Number of isotope peaks used for i-FIT = 3

Monoisotopic Mass, Even Electron Ions

9 formula(e) evaluated with 1 results within limits (up to 50 best isotopic matches for each mass)

Elements Used:

C: 27-33 H: 44-51 N: 2-5 O: 2-5

7

250310-2-Q-15 41 (0.103)

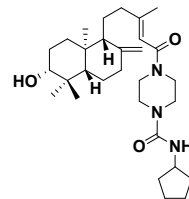

Chemical Formula:  $C_{30}H_{49}N_3O_3$   
Exact Mass: 499.3774  
Molecular Weight: 499.7400

1: TOF MS ES+  
2.16e+005

14c

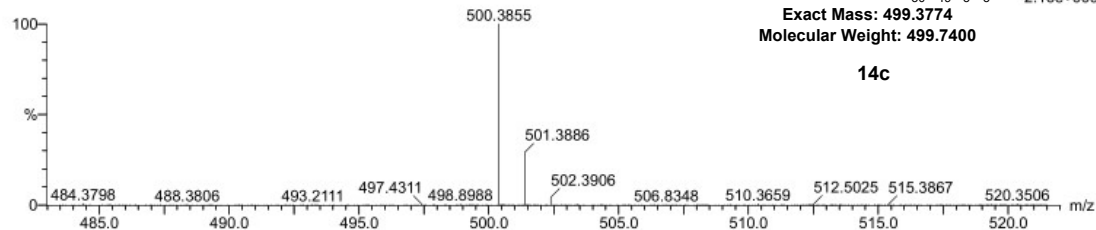

Minimum: -1.5  
Maximum: 5.0 10.0 50.0

| Mass     | Calc. Mass | mDa | PPM | DBE | i-FIT | Norm | Conf(%) | Formula       |
|----------|------------|-----|-----|-----|-------|------|---------|---------------|
| 500.3855 | 500.3852   | 0.3 | 0.6 | 7.5 | 406.1 | n/a  | n/a     | C30 H50 N3 O3 |

Figure S11. HRMS spectrum of 14c

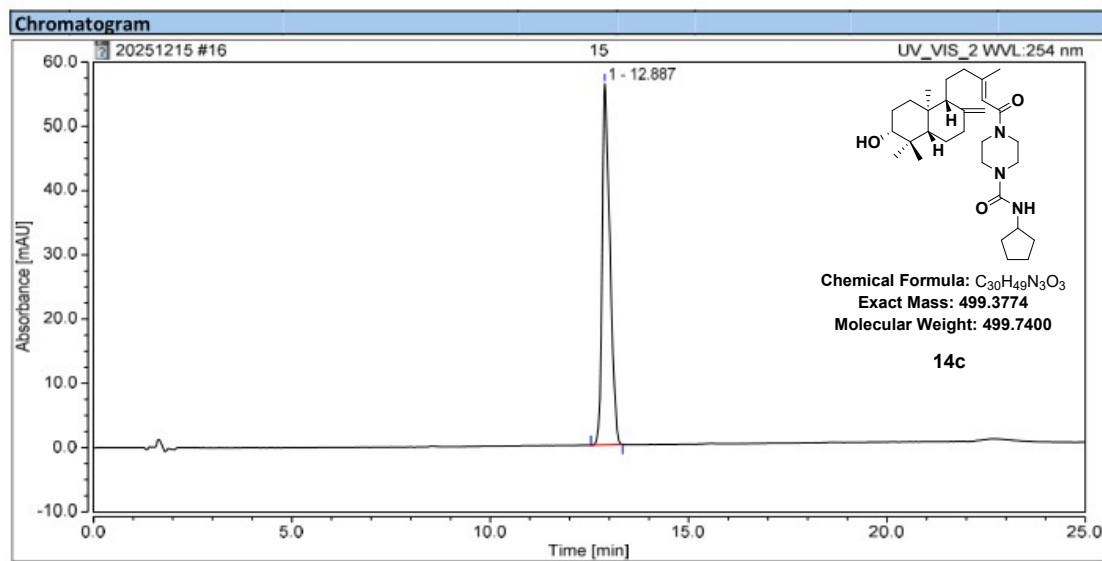

| Integration Results |           |                    |              |            |                 |                   |        |
|---------------------|-----------|--------------------|--------------|------------|-----------------|-------------------|--------|
| No.                 | Peak Name | Retention Time min | Area mAU*min | Height mAU | Relative Area % | Relative Height % | Amount |
| 1                   |           | 12.887             | 12.664       | 56.239     | 100.00          | 100.00            | n.a.   |
| Total:              |           |                    | 12.664       | 56.239     | 100.00          | 100.00            |        |

Figure S12. HPLC spectrum of 14c

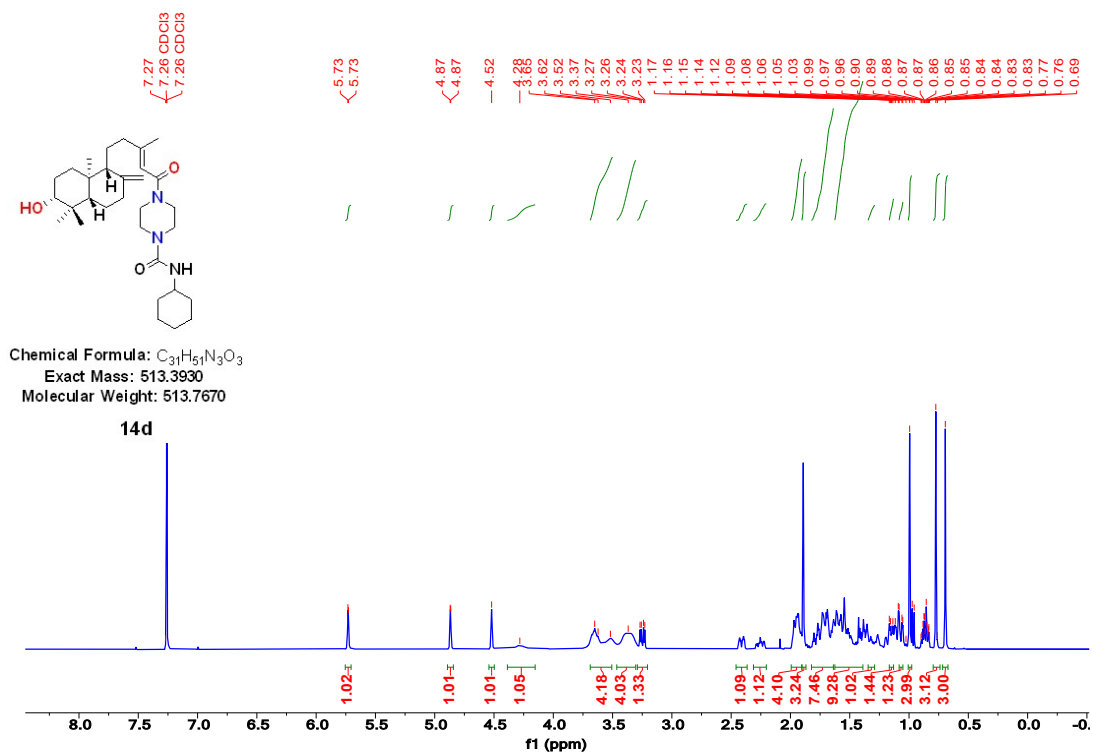

Figure S13.  $^1\text{H}$  NMR spectrum of **14d**

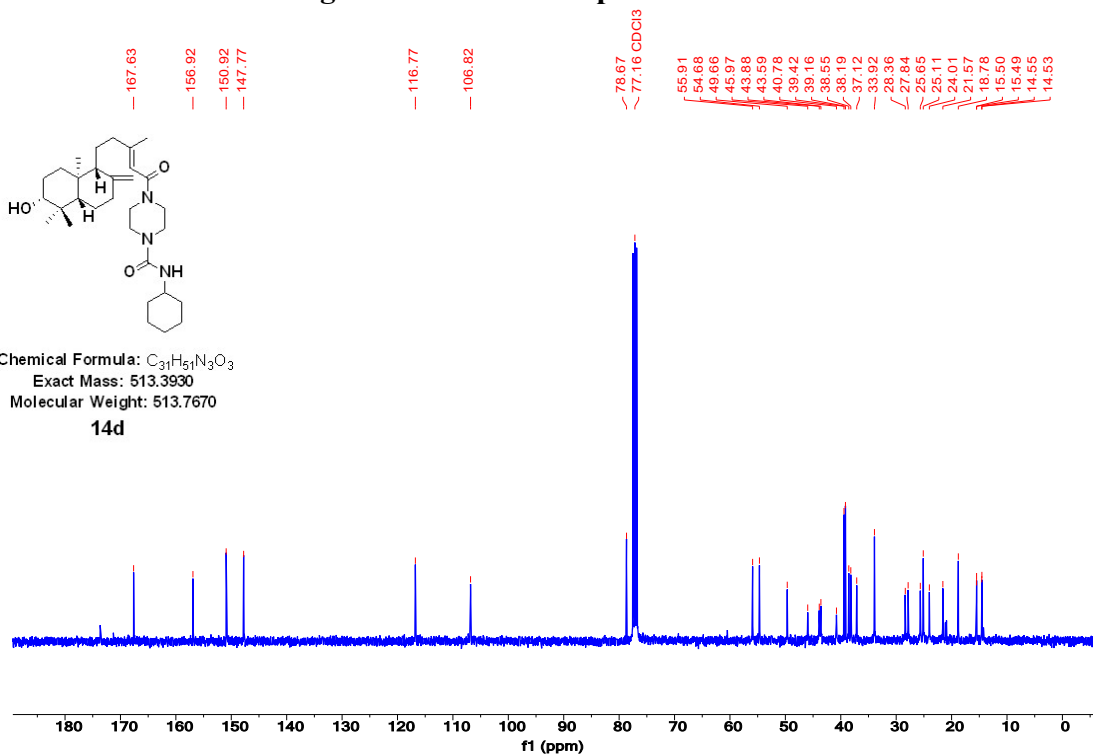

Figure S14.  $^{13}\text{C}$  NMR spectrum of **14d**

### Single Mass Analysis

Tolerance = 5.0 mDa / DBE: min = -1.5, max = 50.0

Element prediction: Off

Number of isotope peaks used for i-FIT = 3

Monoisotopic Mass, Even Electron Ions

11 formula(e) evaluated with 1 results within limits (up to 50 best isotopic matches for each mass)

Elements Used:

C: 27-33 H: 44-52 N: 2-5 O: 2-5

7

250310-2-Q-17 20 (0.063)

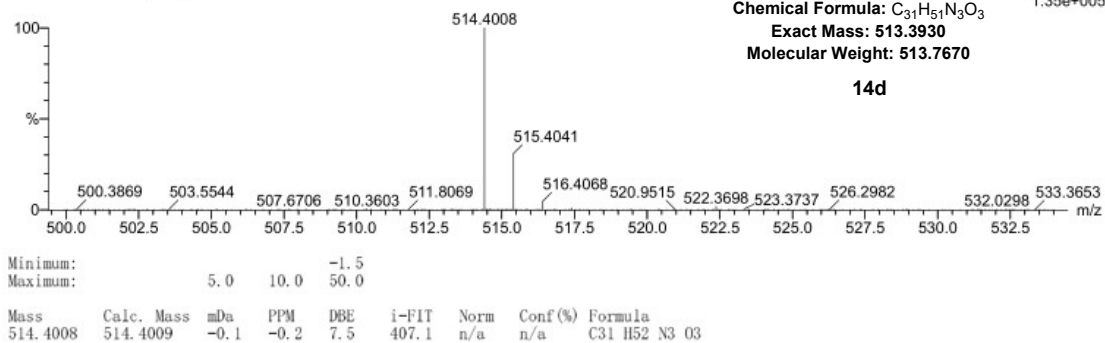

Figure S15. HRMS spectrum of 14d

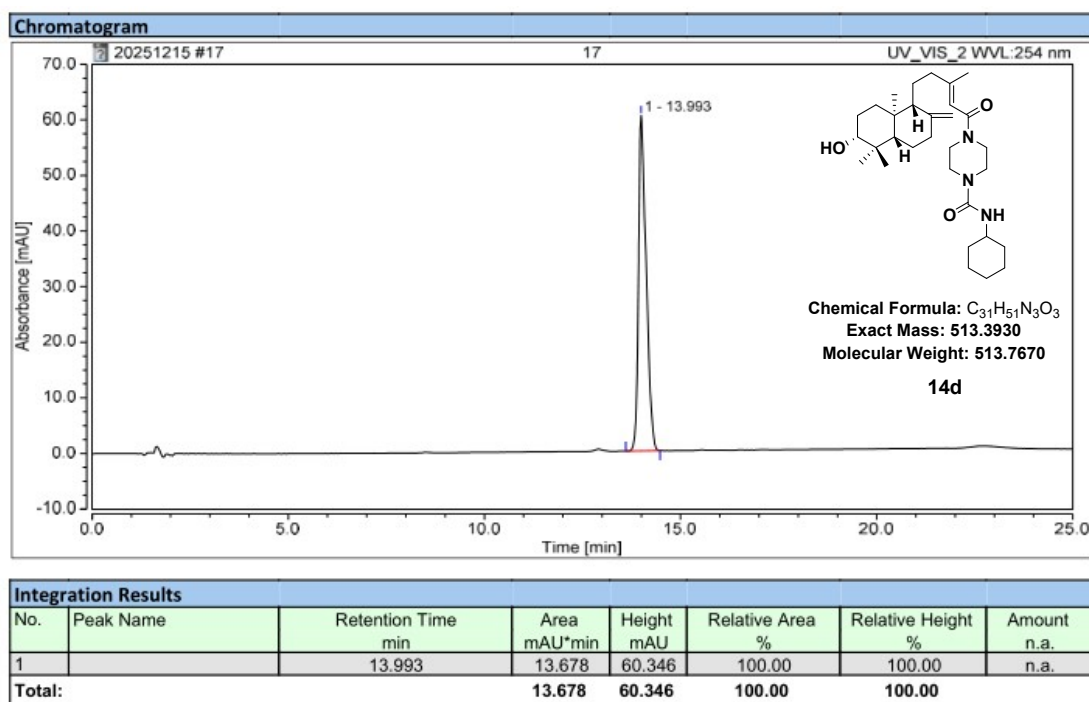

Figure S16. HPLC spectrum of 14d

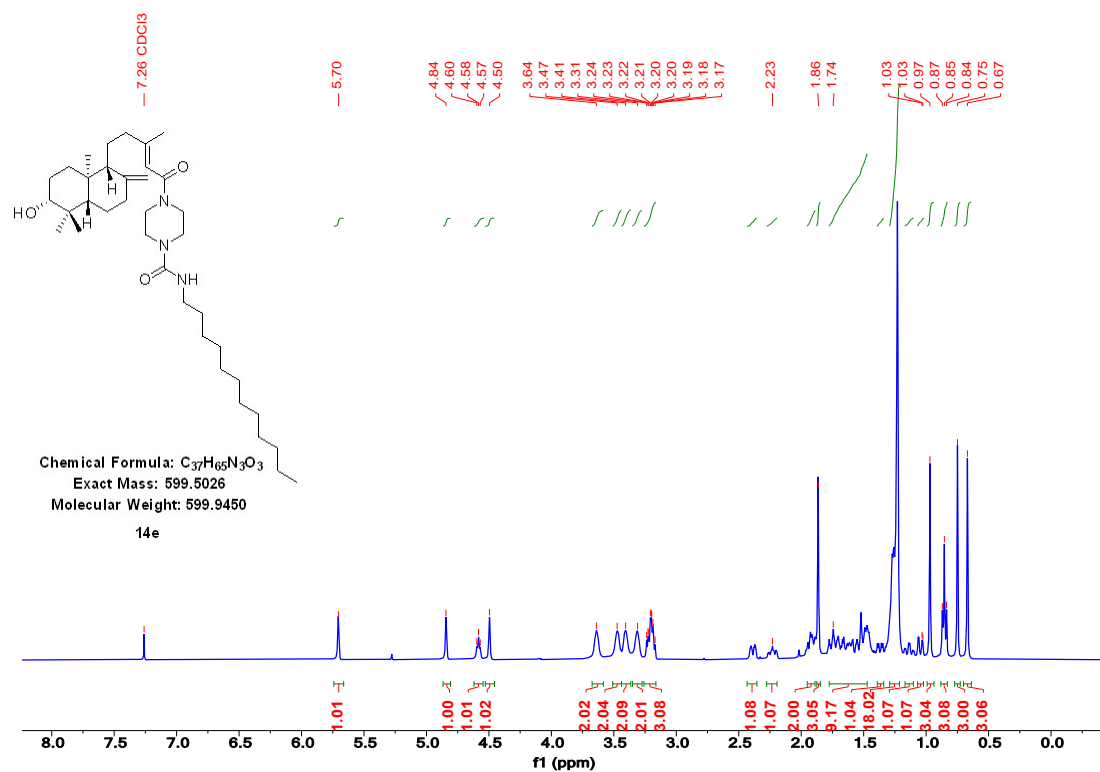

Figure S17.  $^1H$  NMR spectrum of 14e

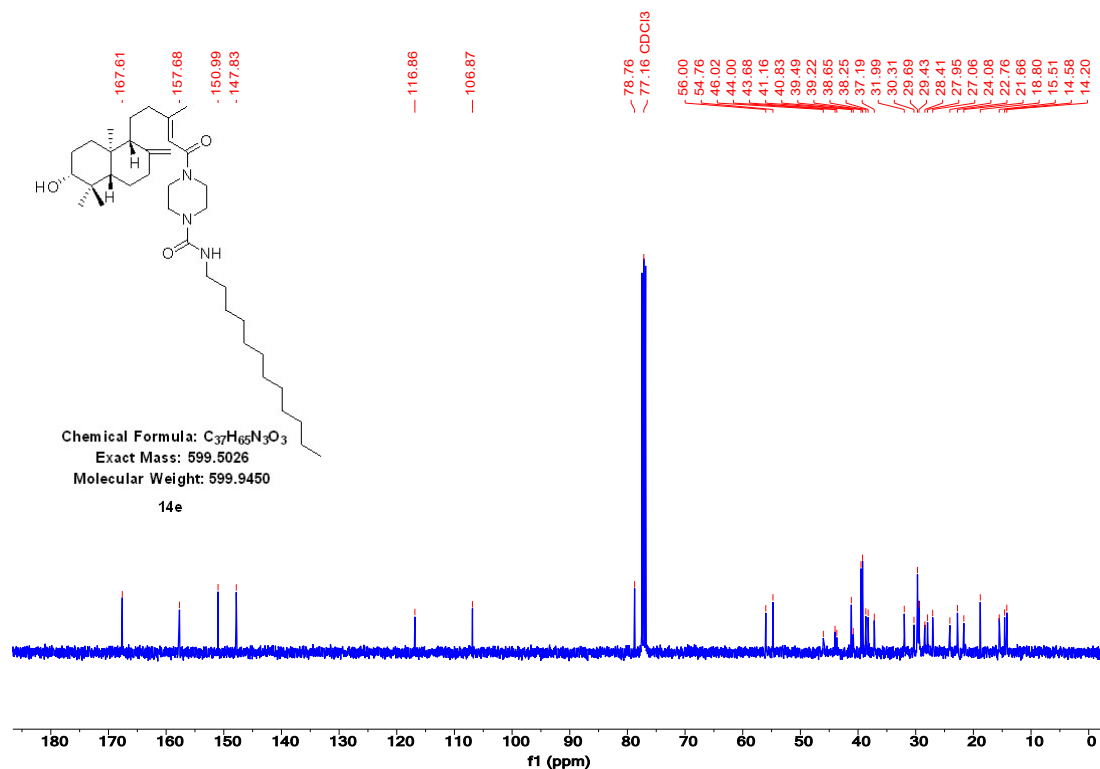

Figure S18.  $^{13}C$  NMR spectrum of 14e

### Single Mass Analysis

Tolerance = 5.0 mDa / DBE: min = -1.5, max = 50.0

Element prediction: Off

Number of isotope peaks used for i-FIT = 3

Monoisotopic Mass, Even Electron Ions

5 formula(e) evaluated with 1 results within limits (up to 50 best isotopic matches for each mass)

Elements Used:

C: 37-37 H: 63-65 N: 2-6 O: 2-6 Na: 0-1

7

250310-2-Q-25 26 (0.075)

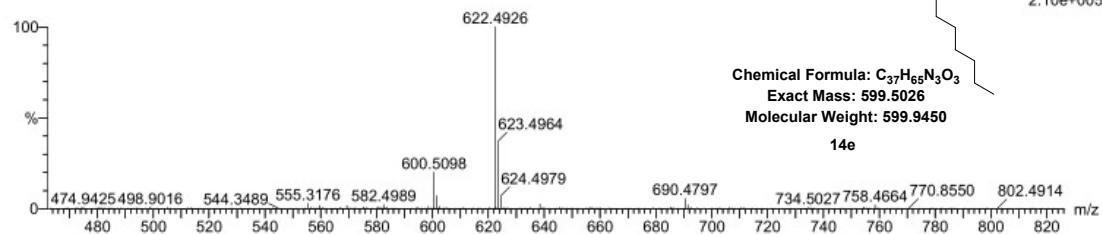

Minimum: -1.5  
Maximum: 5.0 10.0 50.0

| Mass     | Calc. Mass | mDa | PPM | DBE | i-FIT | Norm | Conf (%) | Formula          |
|----------|------------|-----|-----|-----|-------|------|----------|------------------|
| 622.4926 | 622.4924   | 0.2 | 0.3 | 6.5 | 446.1 | n/a  | n/a      | C37 H65 N3 O3 Na |

Figure S19. HRMS spectrum of 14e

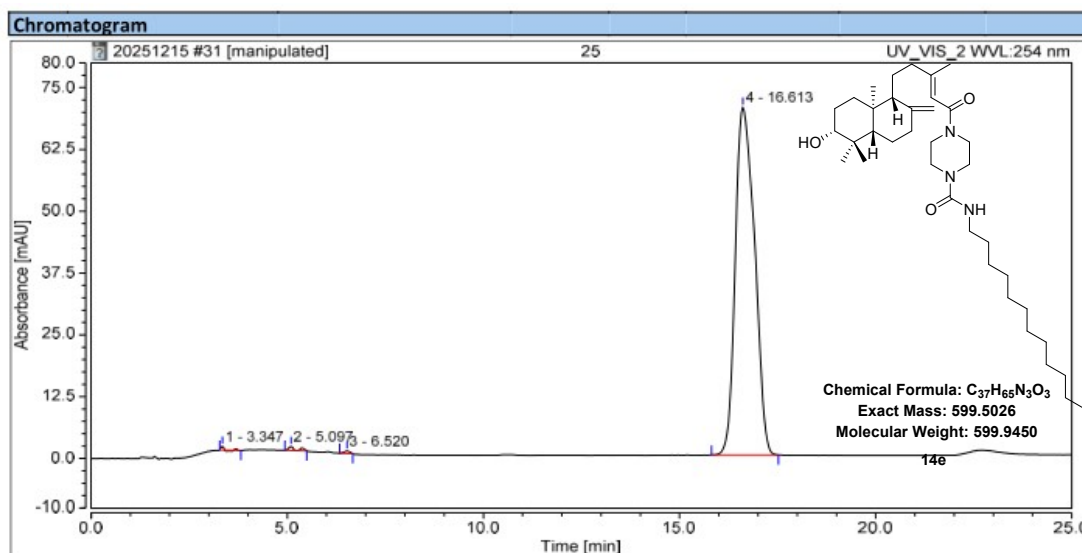

| No.           | Peak Name | Retention Time<br>min | Area<br>mAU*min | Height<br>mAU | Relative Area<br>% | Relative Height<br>% | Amount |
|---------------|-----------|-----------------------|-----------------|---------------|--------------------|----------------------|--------|
| 1             |           | 3.347                 | 0.056           | 0.817         | 0.14               | 1.13                 | n.a.   |
| 2             |           | 5.097                 | 0.172           | 0.800         | 0.43               | 1.10                 | n.a.   |
| 3             |           | 6.520                 | 0.087           | 0.516         | 0.22               | 0.71                 | n.a.   |
| 4             |           | 16.613                | 40.046          | 70.367        | 99.22              | 97.06                | n.a.   |
| <b>Total:</b> |           |                       | <b>40.361</b>   | <b>72.499</b> | <b>100.00</b>      | <b>100.00</b>        |        |

Figure S20. HPLC spectrum of 14e

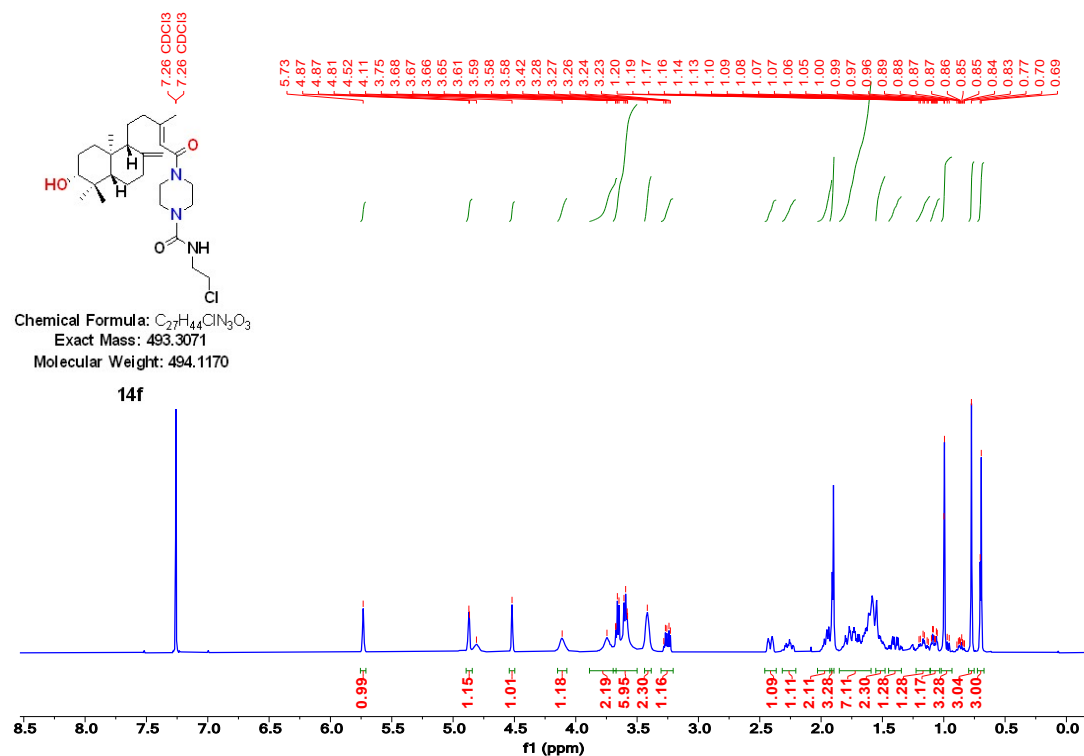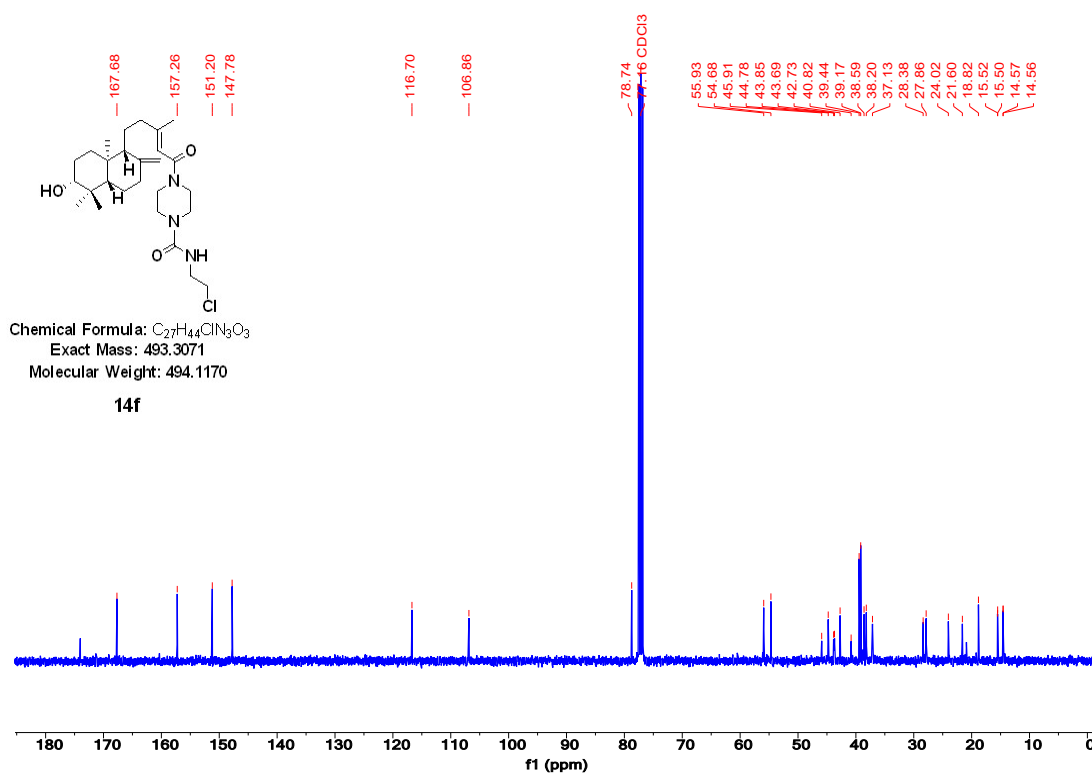

### Single Mass Analysis

Tolerance = 5.0 mDa / DBE: min = -1.5, max = 50.0  
Element prediction: Off  
Number of isotope peaks used for i-FIT = 3

Monoisotopic Mass, Even Electron Ions

31 formula(e) evaluated with 1 results within limits (up to 50 best isotopic matches for each mass)

Elements Used:

C: 27-33 H: 44-51 N: 2-5 O: 2-5 Na: 0-1 Cl: 0-1

7

250310-2-Q-13 40 (0.101)

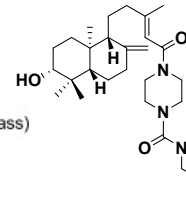

Chemical Formula:  $C_{27}H_{44}ClN_3O_3$   
Exact Mass: 493.3071  
Molecular Weight: 494.1170

14f

1: TOF MS ES+  
2.55e+005

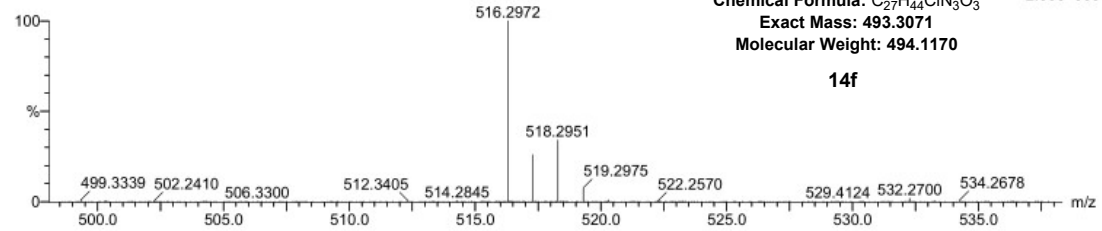

Minimum: -1.5  
Maximum: 50.0

| Mass     | Calc. Mass | mDa | PPM | DBE | i-FIT | Norm | Conf (%) | Formula             |
|----------|------------|-----|-----|-----|-------|------|----------|---------------------|
| 516.2972 | 516.2969   | 0.3 | 0.6 | 6.5 | 476.1 | n/a  | n/a      | C27 H44 N3 O3 Na Cl |

Figure S23. HRMS spectrum of 14f

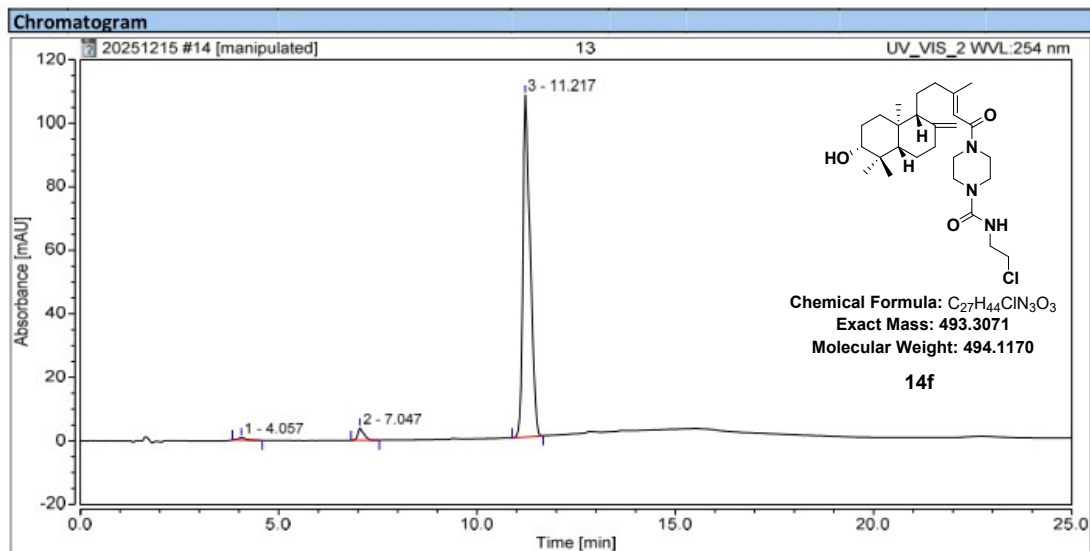

Chemical Formula:  $C_{27}H_{44}ClN_3O_3$   
Exact Mass: 493.3071  
Molecular Weight: 494.1170

14f

| Integration Results |           |                       |                 |               |                    |                      |                |
|---------------------|-----------|-----------------------|-----------------|---------------|--------------------|----------------------|----------------|
| No.                 | Peak Name | Retention Time<br>min | Area<br>mAU*min | Height<br>mAU | Relative Area<br>% | Relative Height<br>% | Amount<br>n.a. |
| 1                   |           | 4.057                 | 0.156           | 0.743         | 0.66               | 0.66                 | n.a.           |
| 2                   |           | 7.047                 | 0.679           | 3.871         | 2.88               | 3.45                 | n.a.           |
| 3                   |           | 11.217                | 22.693          | 107.674       | 96.45              | 95.89                | n.a.           |
| Total:              |           |                       | 23.527          | 112.288       | 100.00             | 100.00               |                |

Figure S24. HPLC spectrum of 14f

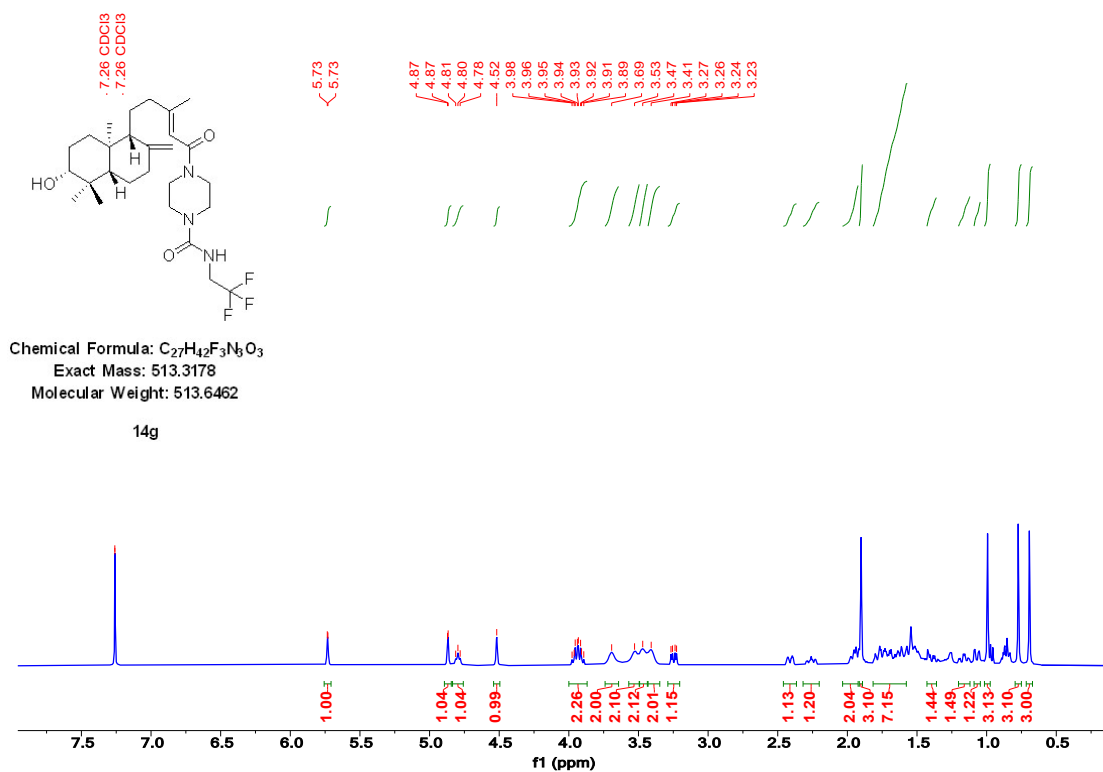

**Figure S25. <sup>1</sup>H NMR spectrum of 14g**

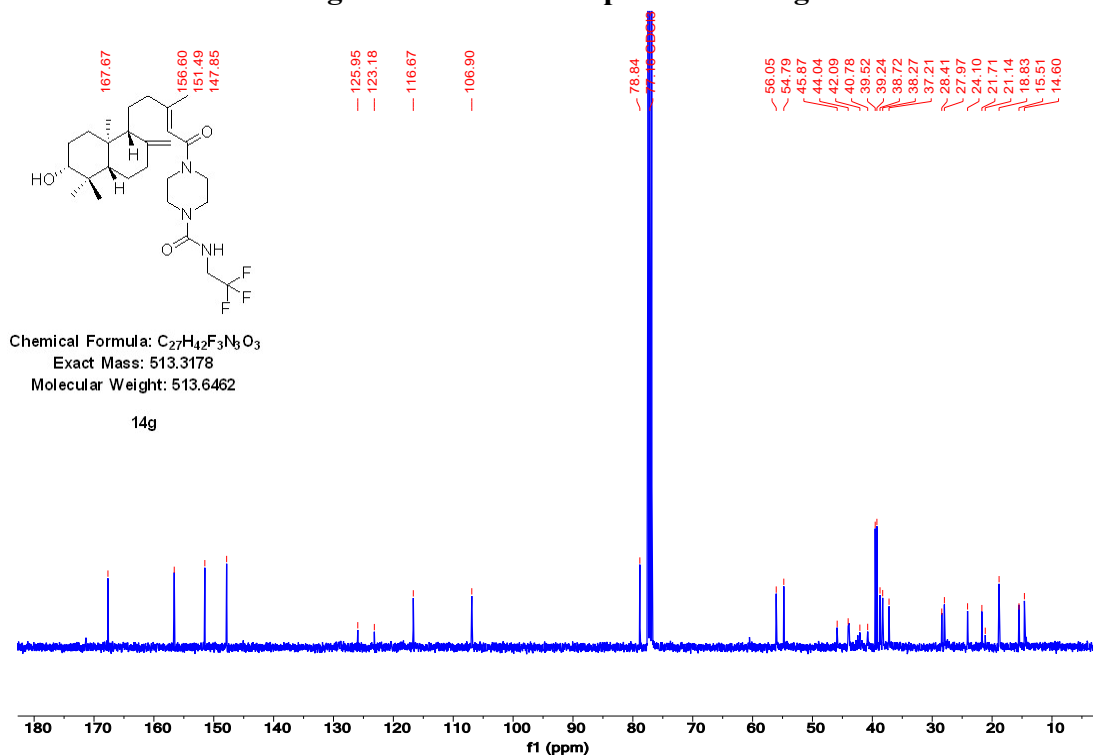

**Figure S26. <sup>13</sup>C NMR spectrum of 14g**

### Single Mass Analysis

Tolerance = 5.0 mDa / DBE: min = -1.5, max = 50.0

Element prediction: Off

Number of isotope peaks used for i-FIT = 3

Monoisotopic Mass, Even Electron Ions

16 formula(e) evaluated with 1 results within limits (up to 50 best isotopic matches for each mass)

Elements Used:

C: 27-27 H: 42-43 N: 2-6 O: 2-6 F: 0-3

7

250310-2-Q-35 20 (0.063)

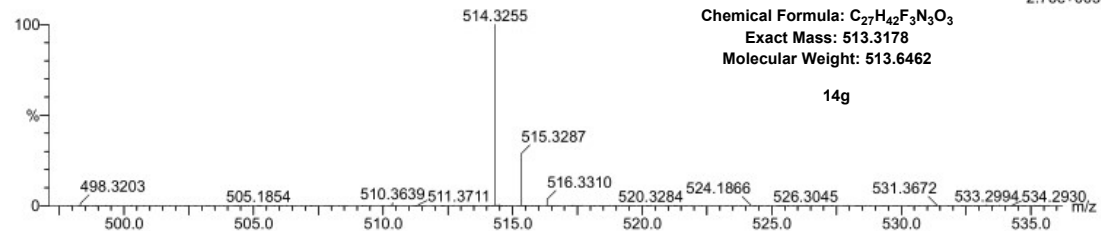

Chemical Formula: C<sub>27</sub>H<sub>42</sub>F<sub>3</sub>N<sub>3</sub>O<sub>3</sub>

Exact Mass: 513.3178

Molecular Weight: 513.6462

14g

1: TOF MS ES+  
2.76e+005

Minimum: -1.5  
Maximum: 5.0 10.0 50.0

| Mass     | Calc. Mass | mDa  | PPM  | DBE | i-FIT | Norm | Conf (%) | Formula                                                                      |
|----------|------------|------|------|-----|-------|------|----------|------------------------------------------------------------------------------|
| 514.3255 | 514.3257   | -0.2 | -0.4 | 6.5 | 418.6 | n/a  | n/a      | C <sub>27</sub> H <sub>43</sub> N <sub>3</sub> O <sub>3</sub> F <sub>3</sub> |

Figure S27. HRMS spectrum of 14g

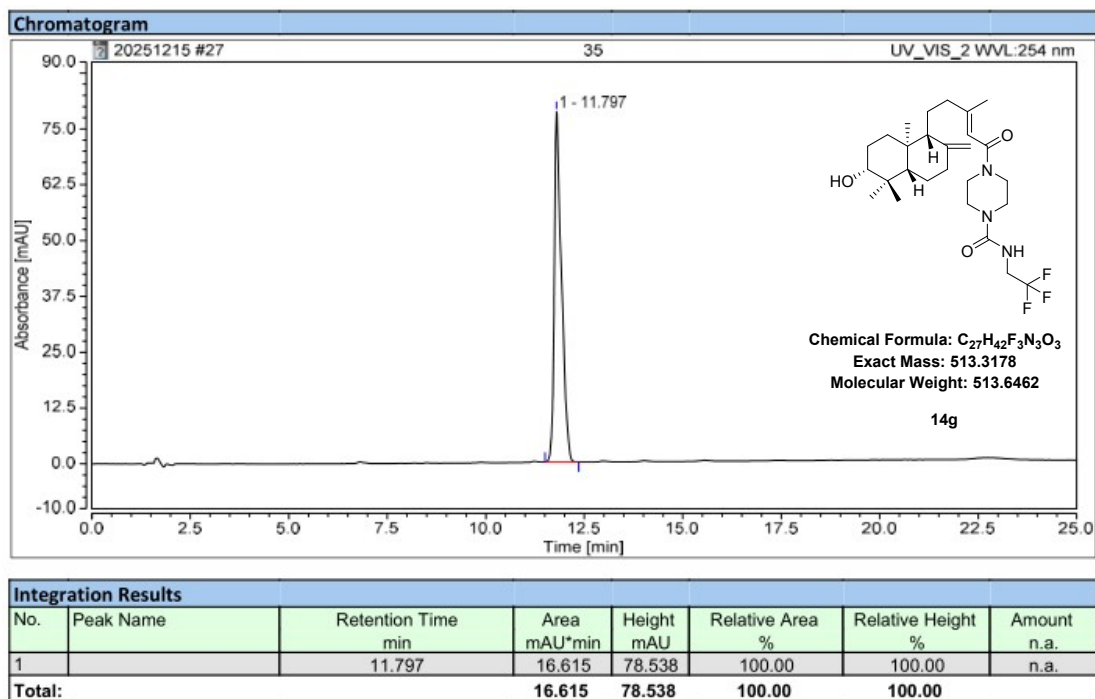

Figure S28. HPLC spectrum of 14g

$^{19}\text{F}$  NMR (376 MHz,  $\text{CDCl}_3$ ) -72.99.

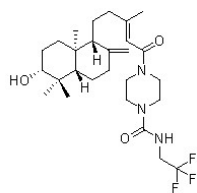

Chemical Formula:  $\text{C}_{27}\text{H}_{42}\text{F}_3\text{N}_3\text{O}_3$

Exact Mass: 513.3178

Molecular Weight: 513.6462

14g

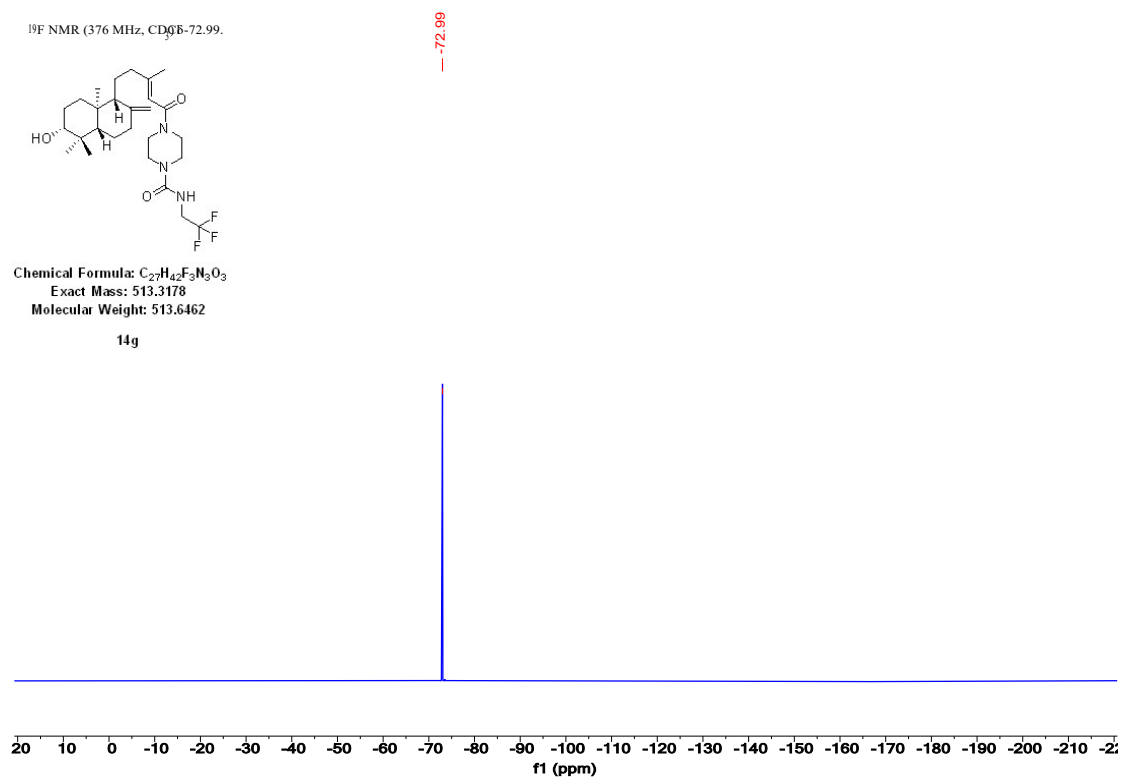

Figure S29.  $^{19}\text{F}$  NMR spectrum of 14g

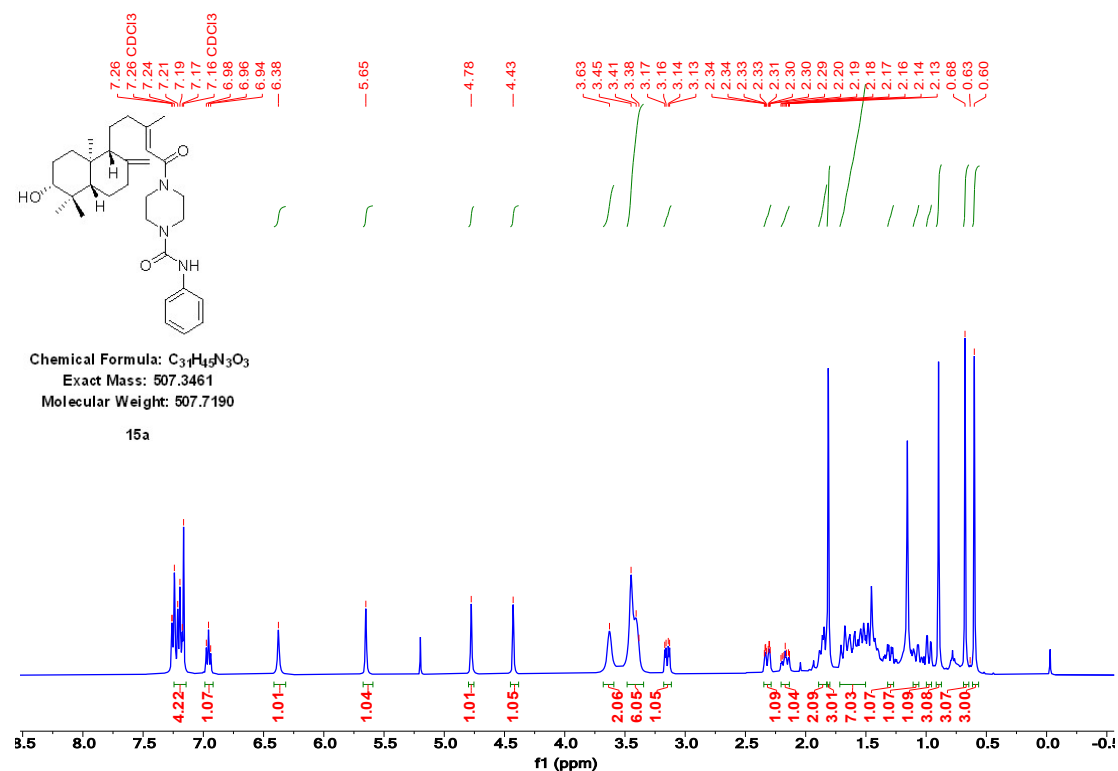

Figure S30.  $^1\text{H}$  NMR spectrum of 15a

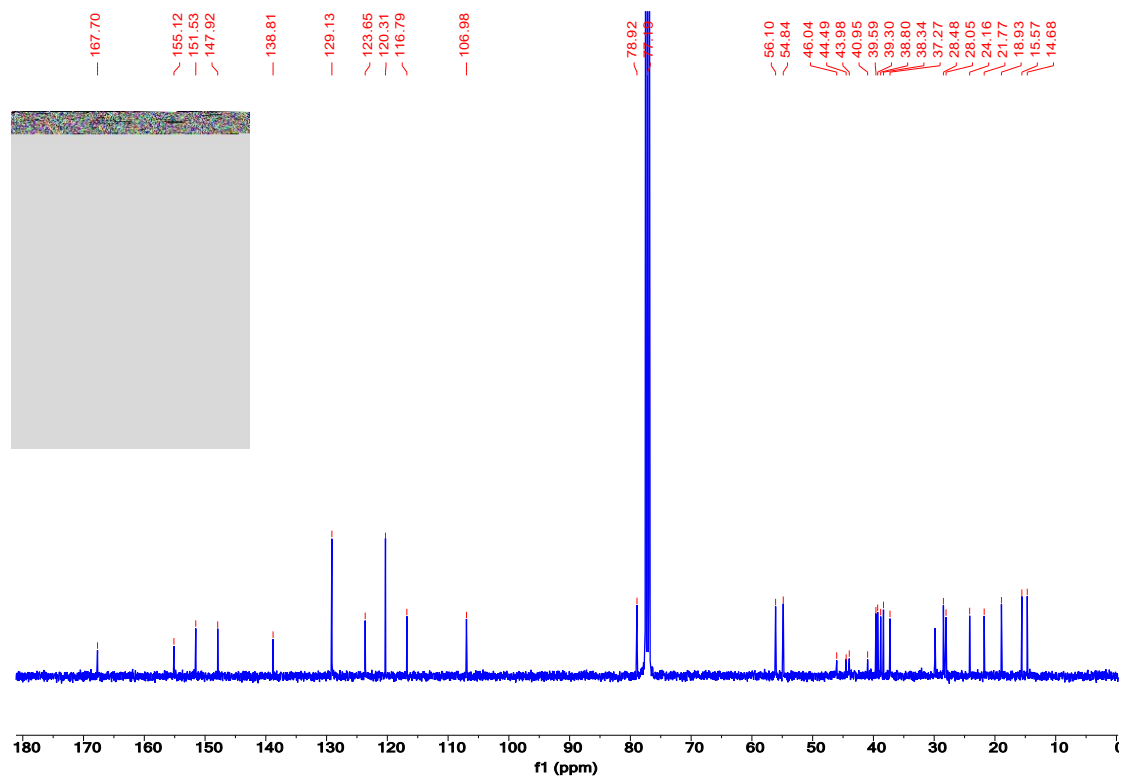

Figure S31.  $^{13}\text{C}$  NMR spectrum of 15a

**Single Mass Analysis**

Tolerance = 5.0 mDa / DBE: min = -1.5, max = 50.0

Element prediction: Off

Number of isotope peaks used for i-FIT = 3

Monoisotopic Mass, Even Electron Ions

48 formula(e) evaluated with 1 results within limits (up to 50 best isotopic matches for each mass)

Elements Used:

C: 31-32 H: 24-45 N: 2-7 O: 2-7 Na: 0-1

7

250310-2-Q-41 21 (0.065)

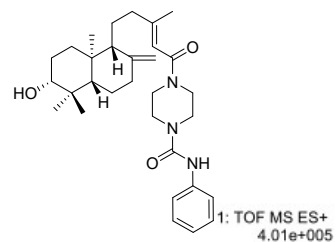

Chemical Formula:  $\text{C}_{31}\text{H}_{45}\text{N}_3\text{O}_3$

Exact Mass: 507.3461

Molecular Weight: 507.7190

15a

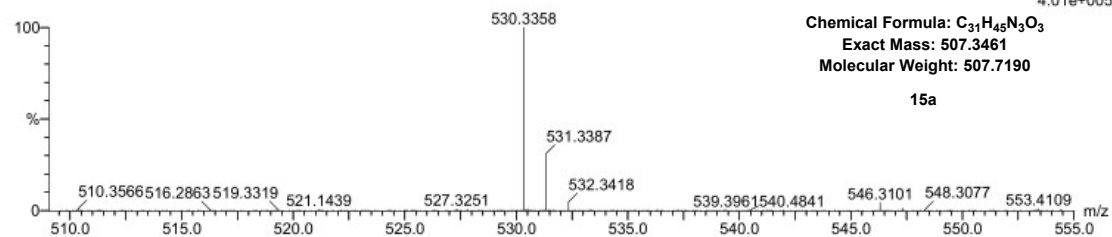

Minimum: -1.5  
Maximum: 5.0 10.0 50.0

| Mass     | Calc. Mass | mDa  | PPM  | DBE  | i-FIT | Norm | Conf(%) | Formula          |
|----------|------------|------|------|------|-------|------|---------|------------------|
| 530.3358 | 530.3359   | -0.1 | -0.2 | 10.5 | 472.2 | n/a  | n/a     | C31 H45 N3 O3 Na |

Figure S32. HRMS spectrum of 15a

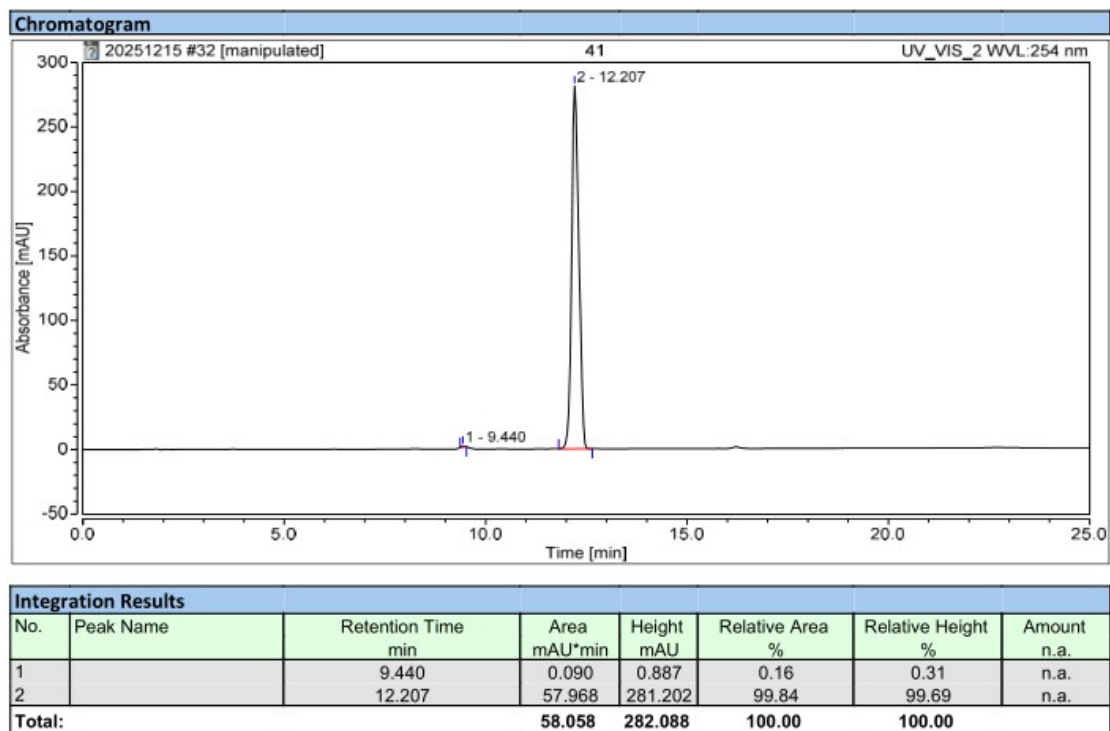

Figure S33. HPLC spectrum of 15a

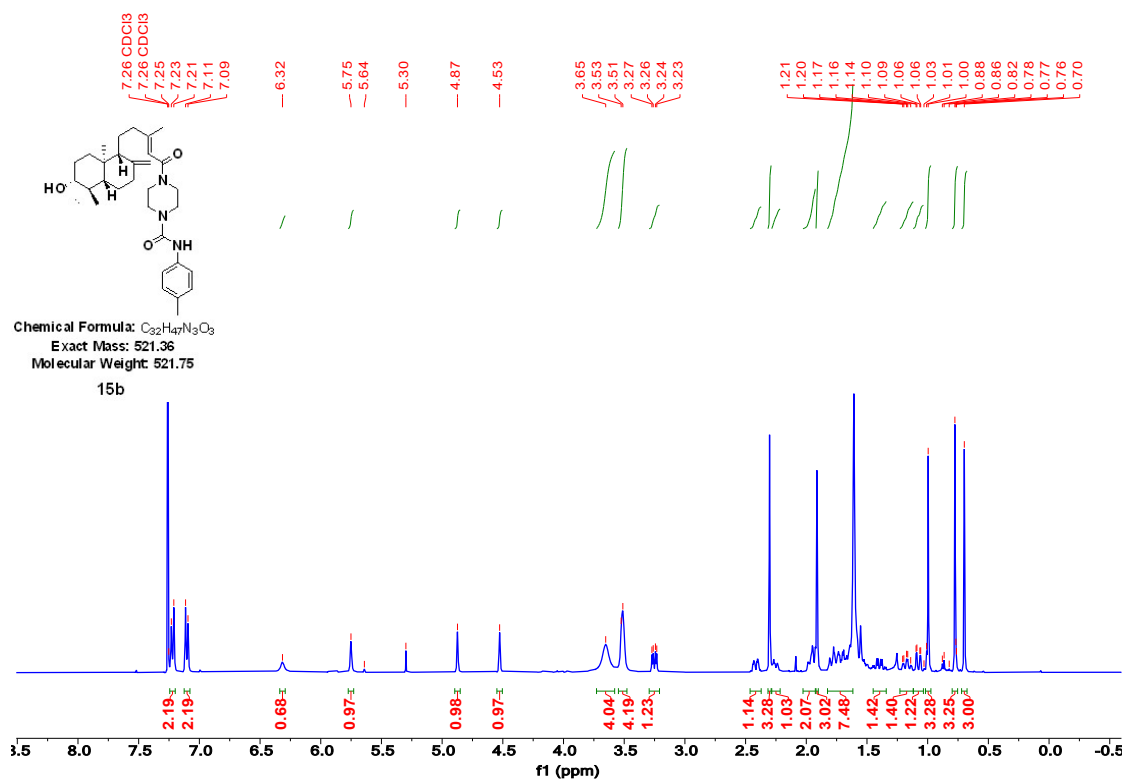

Figure S34.  $^1\text{H}$  NMR spectrum of 15b

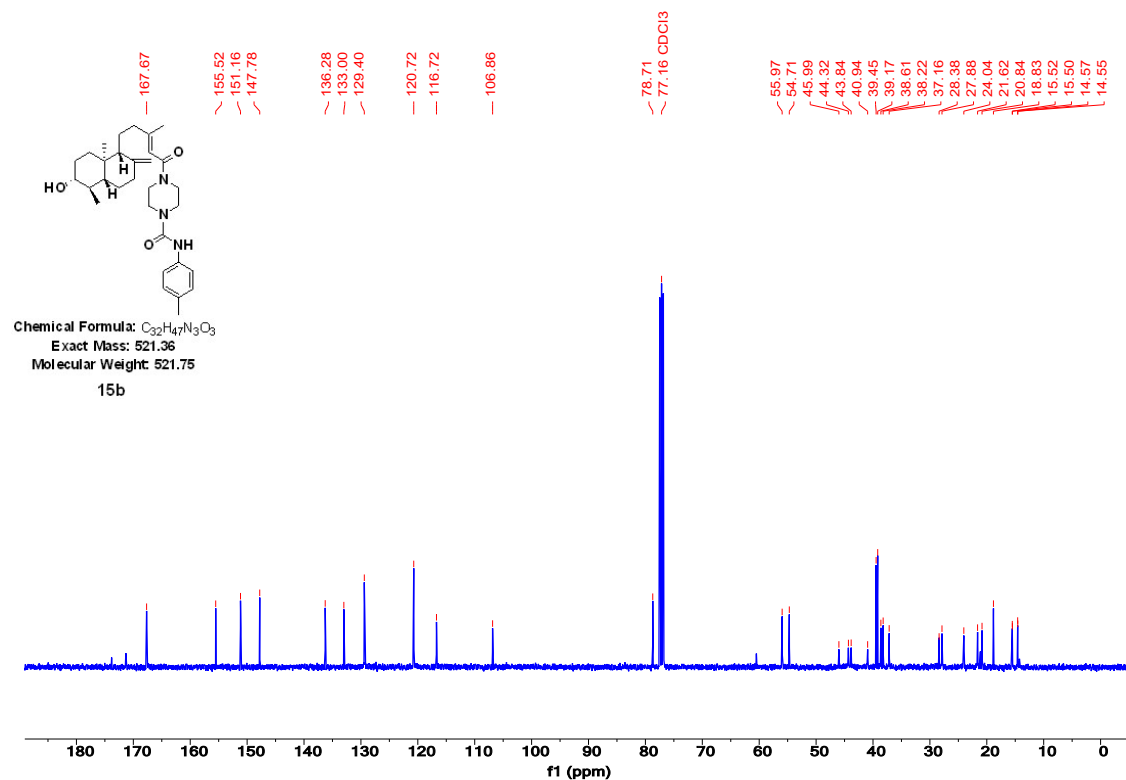

Figure S35.  $^{13}C$  NMR spectrum of 15b

**Single Mass Analysis**

Tolerance = 5.0 PPM / DBE: min = -1.5, max = 50.0  
 Element prediction: Off  
 Number of isotope peaks used for i-FIT = 3

Monoisotopic Mass, Even Electron Ions

445 formula(e) evaluated with 1 results within limits (all results (up to 1000) for each mass)

Elements Used:

C: 32-32 H: 16-50 N: 1-3 O: 1-20 Na: 1-8

30

250310-2-Q-1 59 (0.137)

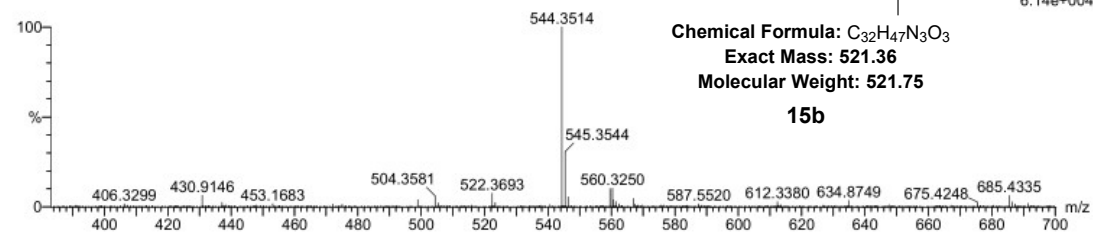

Minimum: -1.5

Maximum: 5.0 5.0 50.0

| Mass     | Calc. Mass | mDa  | PPM  | DBE  | i-FIT | Norm | Conf(%) | Formula                                                          |
|----------|------------|------|------|------|-------|------|---------|------------------------------------------------------------------|
| 544.3514 | 544.3515   | -0.1 | -0.2 | 10.5 | 226.5 | n/a  | n/a     | C <sub>32</sub> H <sub>47</sub> N <sub>3</sub> O <sub>3</sub> Na |

Figure S36. HRMS spectrum of 15b

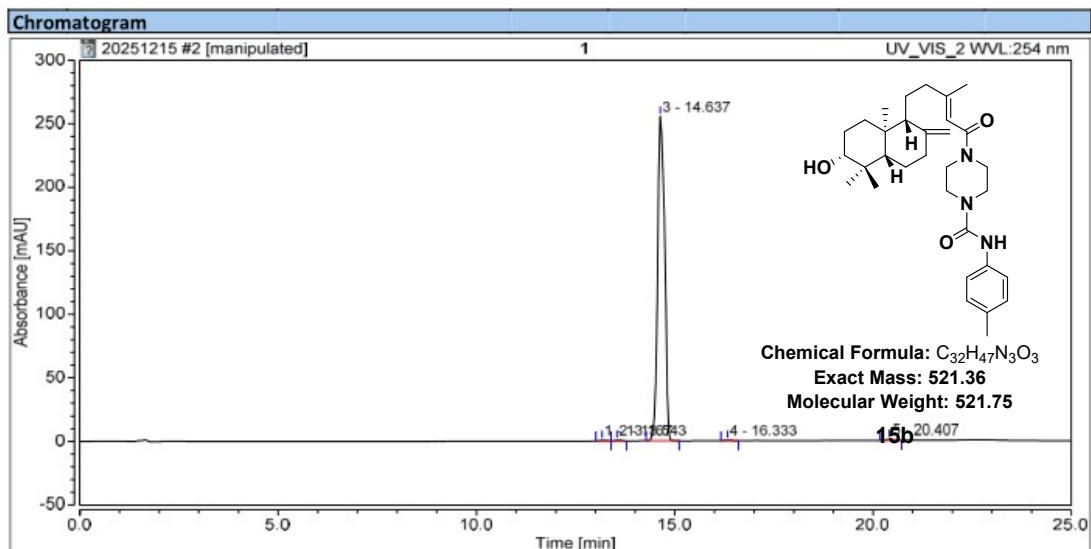

**Integration Results**

| No.           | Peak Name | Retention Time min | Area mAU*min  | Height mAU     | Relative Area % | Relative Height % | Amount |
|---------------|-----------|--------------------|---------------|----------------|-----------------|-------------------|--------|
| 1             |           | 13.167             | 0.111         | 0.557          | 0.21            | 0.22              | n.a.   |
| 2             |           | 13.543             | 0.123         | 0.636          | 0.23            | 0.25              | n.a.   |
| 3             |           | 14.637             | 52.236        | 255.633        | 99.02           | 98.96             | n.a.   |
| 4             |           | 16.333             | 0.107         | 0.533          | 0.20            | 0.21              | n.a.   |
| 5             |           | 20.407             | 0.177         | 0.964          | 0.34            | 0.37              | n.a.   |
| <b>Total:</b> |           |                    | <b>52.754</b> | <b>258.322</b> | <b>100.00</b>   | <b>100.00</b>     |        |

Figure S37. HPLC spectrum of 15b

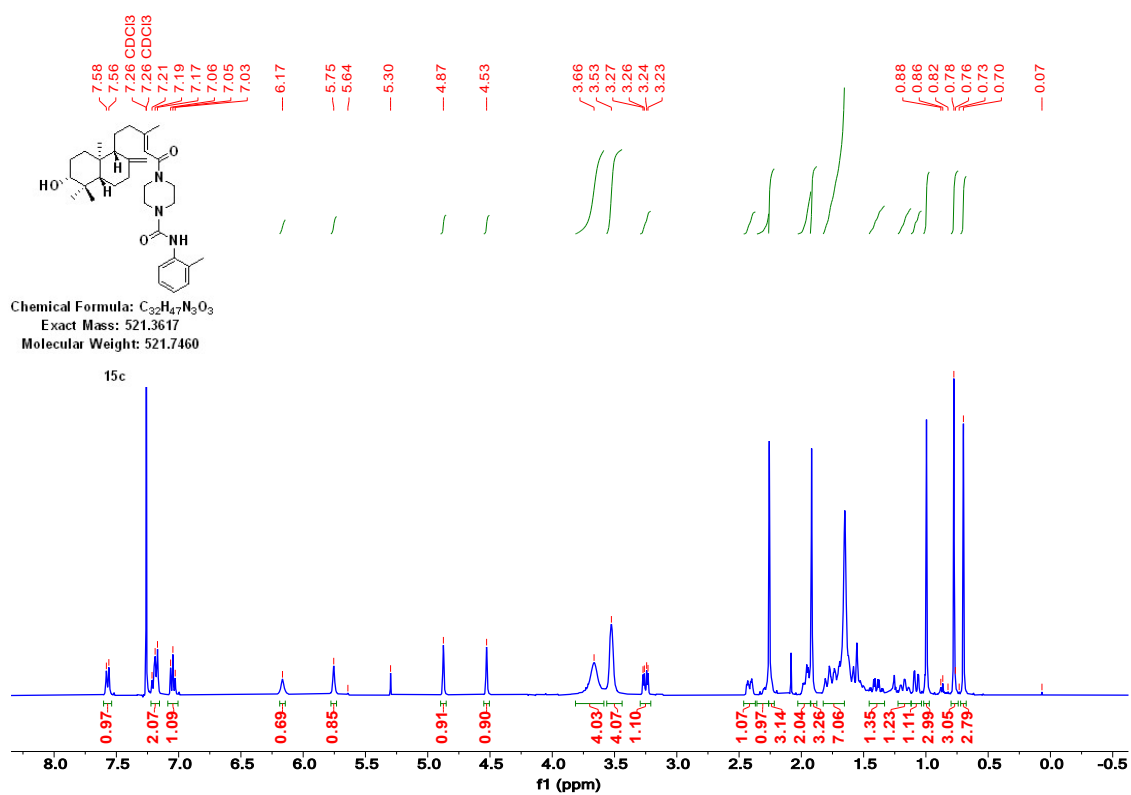

Figure S38.  $^1H$  NMR spectrum of 15c

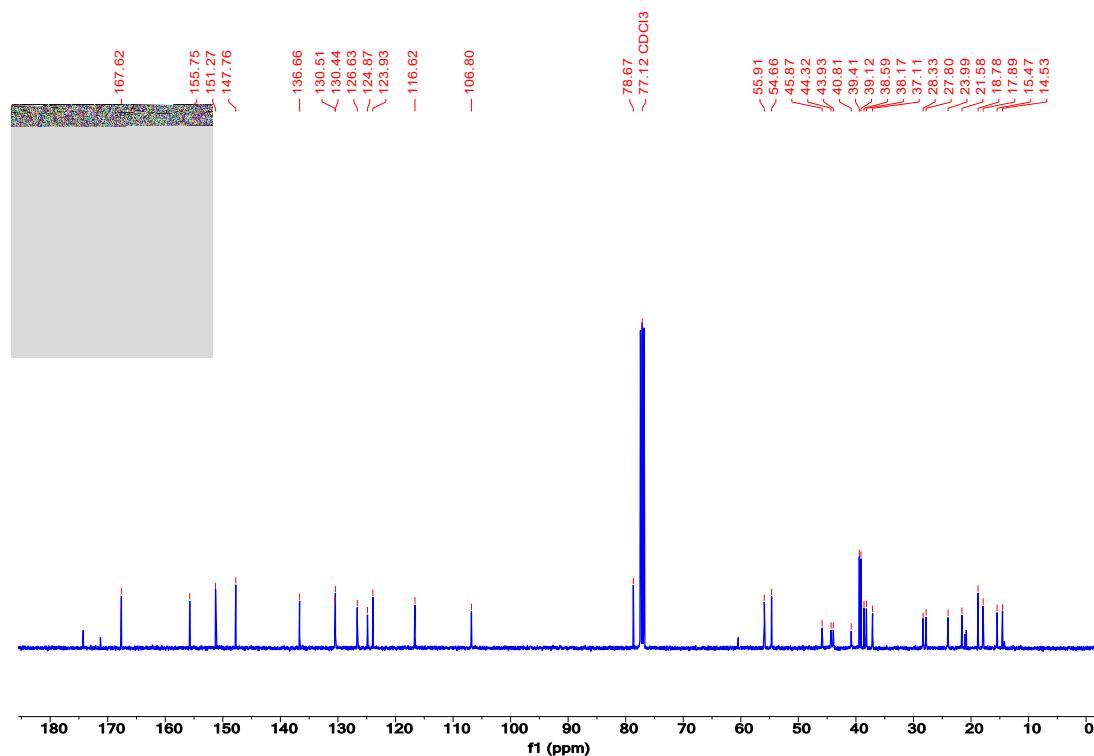

Figure S39.  $^{13}\text{C}$  NMR spectrum of 15c

**Single Mass Analysis**

Tolerance = 3.0 PPM / DBE: min = -1.5, max = 50.0

Element prediction: Off

Number of isotope peaks used for i-FIT = 3

Monoisotopic Mass, Even Electron Ions

4 formula(e) evaluated with 1 results within limits (up to 50 best isotopic matches for each mass)

Elements Used:

C: 30-34 H: 44-50 N: 3-5 O: 3-6

30

250310-2-Q-2 20 (0.063)

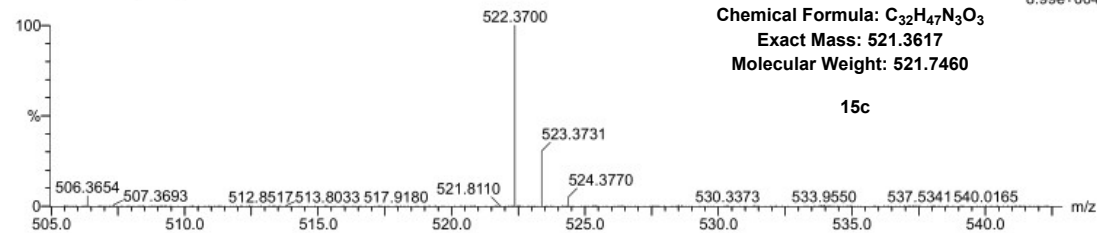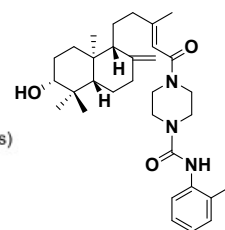

Chemical Formula:  $\text{C}_{32}\text{H}_{47}\text{N}_3\text{O}_3$

Exact Mass: 521.3617

Molecular Weight: 521.7460

15c

1: TOF MS ES+  
8.99e+004

Minimum: -1.5  
Maximum: 50.0

| Mass     | Calc. Mass | mDa | PPM | DBE  | i-FIT | Norm | Conf (%) | Formula       |
|----------|------------|-----|-----|------|-------|------|----------|---------------|
| 522.3700 | 522.3696   | 0.4 | 0.8 | 10.5 | 238.4 | n/a  | n/a      | C32 H48 N3 O3 |

Figure S40. HRMS spectrum of 15c

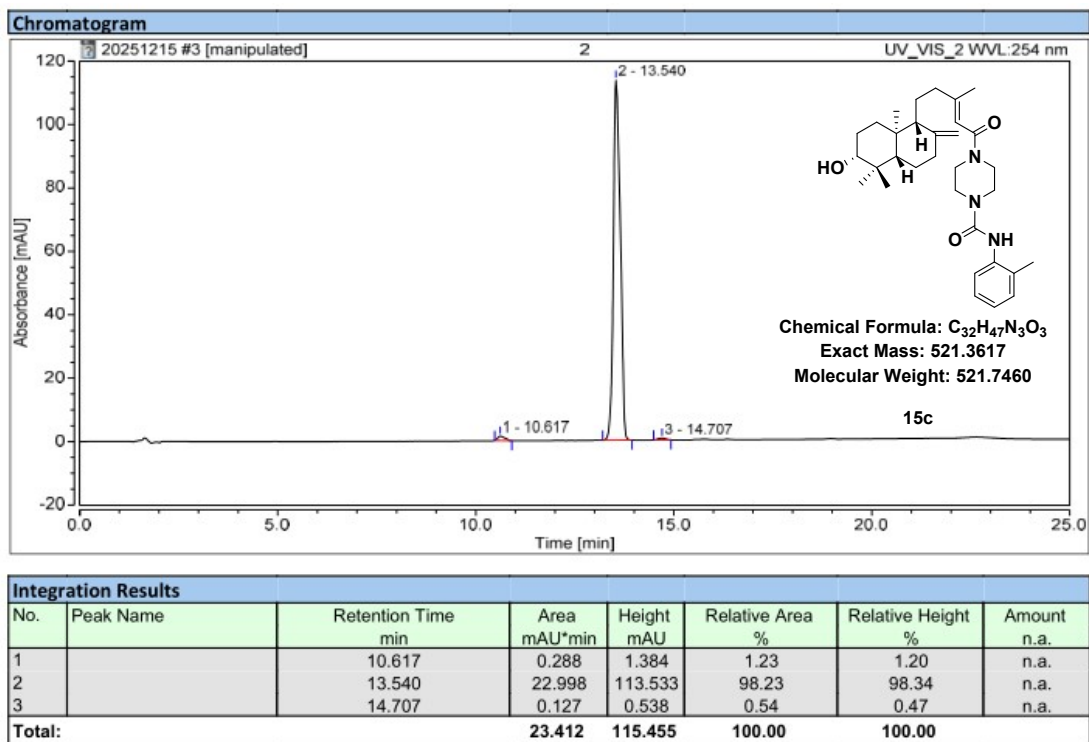

Figure S41. HPLC spectrum of 15c

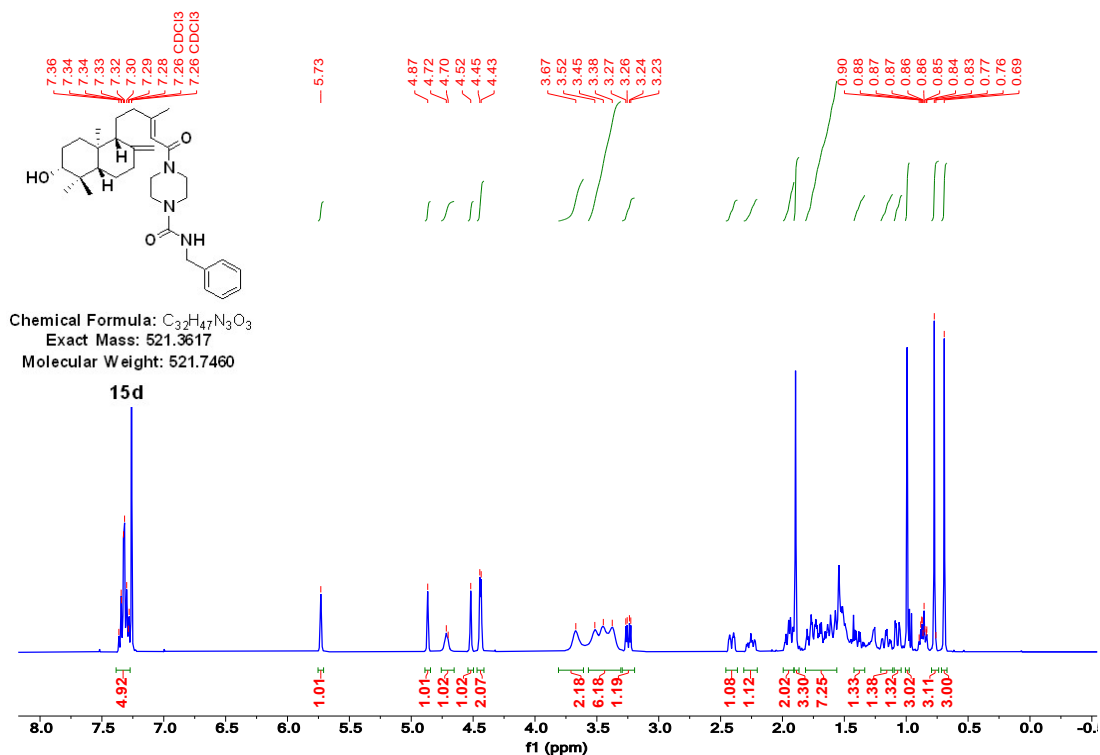

Figure S42.  $^1H$  NMR spectrum of 15d

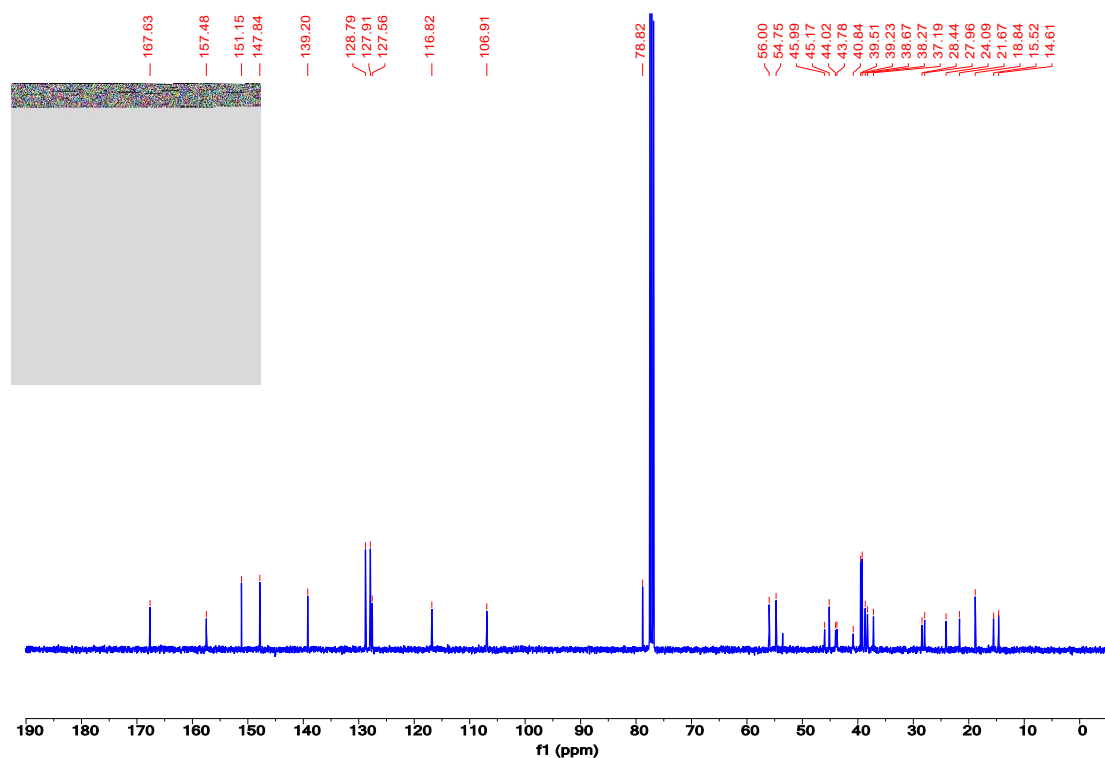

Figure S43.  $^{13}\text{C}$  NMR spectrum of 15d

#### Single Mass Analysis

Tolerance = 5.0 mDa / DBE: min = -1.5, max = 50.0

Element prediction: Off

Number of isotope peaks used for i-FIT = 3

Monoisotopic Mass, Even Electron Ions

33 formula(e) evaluated with 1 results within limits (up to 50 best isotopic matches for each mass)

Elements Used:

C: 29-56 H: 47-85 N: 2-6 O: 2-6

7

250310-2-Q-19 23 (0.069)

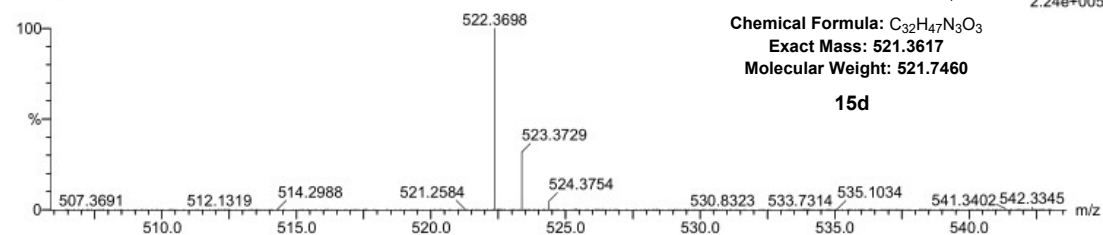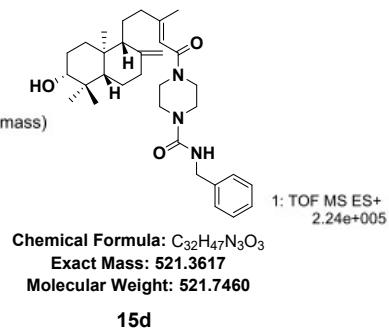

| Mass     | Calc. Mass | mDa | PPM | DBE  | i-FIT | Norm | Conf (%) | Formula                                          |
|----------|------------|-----|-----|------|-------|------|----------|--------------------------------------------------|
| 522.3698 | 522.3696   | 0.2 | 0.4 | 10.5 | 437.7 | n/a  | n/a      | $\text{C}_{32}\text{H}_{48}\text{N}_3\text{O}_3$ |

Figure S44. HRMS spectrum of 15d

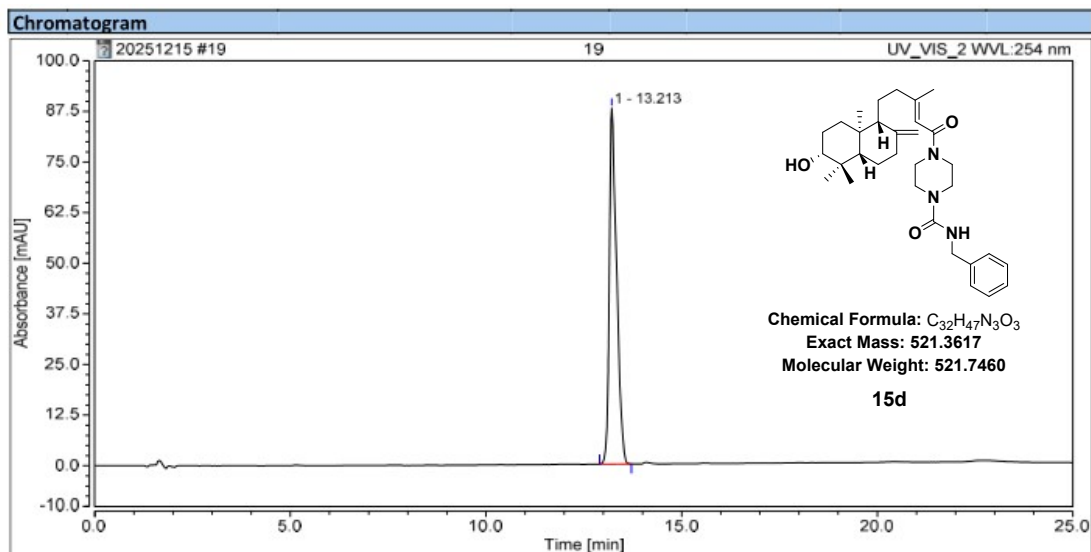

**Integration Results**

| No.           | Peak Name | Retention Time<br>min | Area<br>mAU*min | Height<br>mAU | Relative Area<br>% | Relative Height<br>% | Amount<br>n.a. |
|---------------|-----------|-----------------------|-----------------|---------------|--------------------|----------------------|----------------|
| 1             |           | 13.213                | 19.026          | 87.926        | 100.00             | 100.00               | n.a.           |
| <b>Total:</b> |           |                       | <b>19.026</b>   | <b>87.926</b> | <b>100.00</b>      | <b>100.00</b>        |                |

Figure S45. HPLC spectrum of 15d

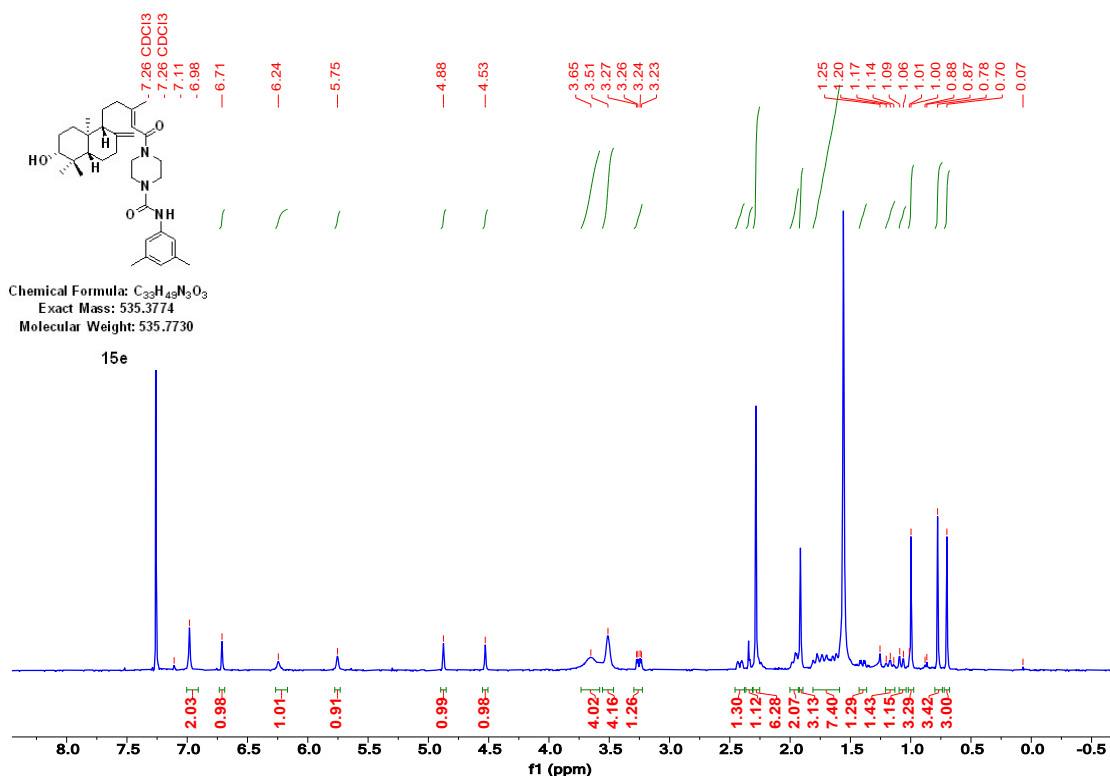

Figure S46.  $^1H$  NMR spectrum of 15e

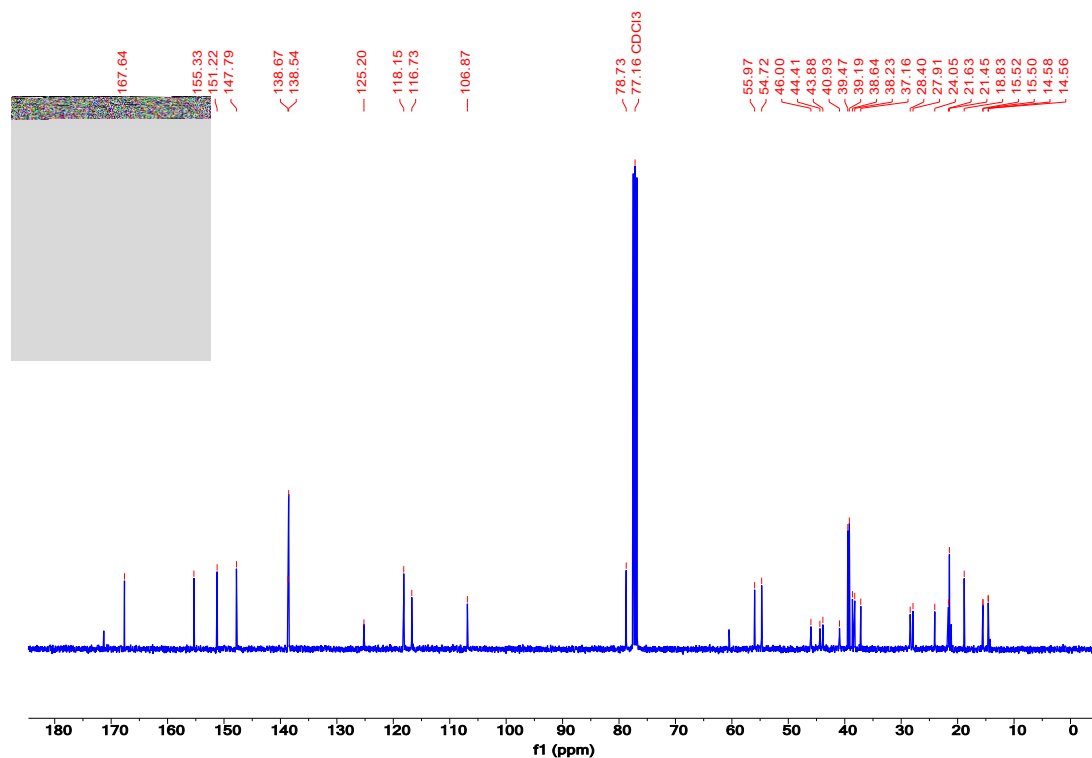

Figure S47.  $^{13}\text{C}$  NMR spectrum of 15e

**Single Mass Analysis**

Tolerance = 3.0 PPM / DBE: min = -1.5, max = 50.0

Element prediction: Off

Number of isotope peaks used for i-FIT = 3

Monoisotopic Mass, Even Electron Ions

5 formula(e) evaluated with 1 results within limits (up to 50 best isotopic matches for each mass)

Elements Used:

C: 30-34 H: 44-50 N: 3-5 O: 3-6

30

250310-2-Q-3 22 (0.067)

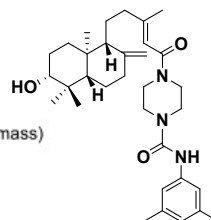

1: TOF MS ES+  
2.29e+005

Chemical Formula:  $\text{C}_{33}\text{H}_{49}\text{N}_3\text{O}_3$

Exact Mass: 535.3774

Molecular Weight: 535.7730

15e

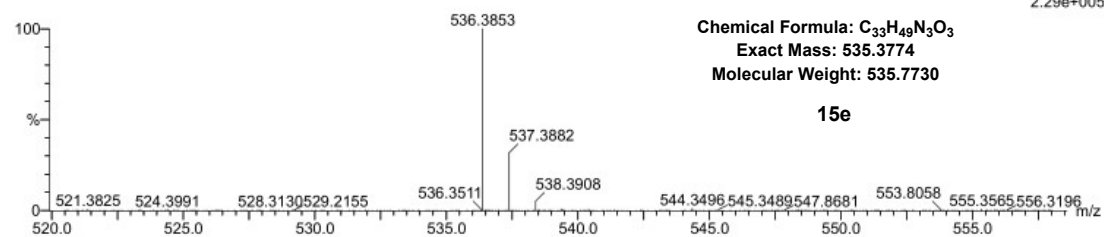

Minimum: -1.5  
Maximum: 5.0 3.0 50.0

| Mass     | Calc. Mass | mDa | PPM | DBE  | i-FIT | Norm | Conf (%) | Formula                                          |
|----------|------------|-----|-----|------|-------|------|----------|--------------------------------------------------|
| 536.3853 | 536.3852   | 0.1 | 0.2 | 10.5 | 421.5 | n/a  | n/a      | $\text{C}_{33}\text{H}_{50}\text{N}_3\text{O}_3$ |

Figure S48. HRMS spectrum of 15e

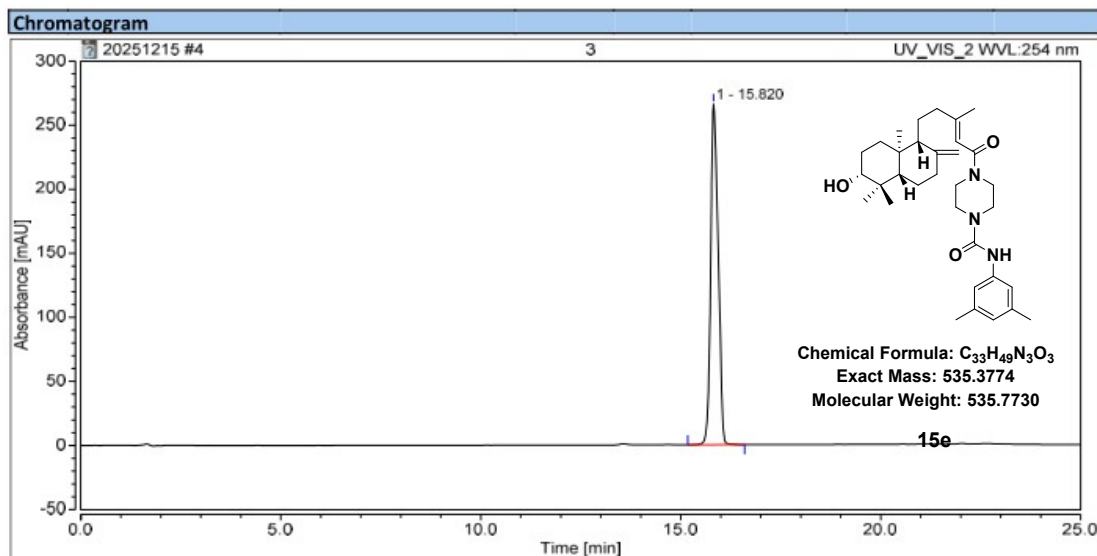

**Integration Results**

| No.           | Peak Name | Retention Time min | Area mAU*min  | Height mAU     | Relative Area % | Relative Height % | Amount |
|---------------|-----------|--------------------|---------------|----------------|-----------------|-------------------|--------|
| 1             |           | 15.820             | 57.987        | 266.136        | 100.00          | 100.00            | n.a.   |
| <b>Total:</b> |           |                    | <b>57.987</b> | <b>266.136</b> | <b>100.00</b>   | <b>100.00</b>     |        |

Figure S49. HPLC spectrum of 15e

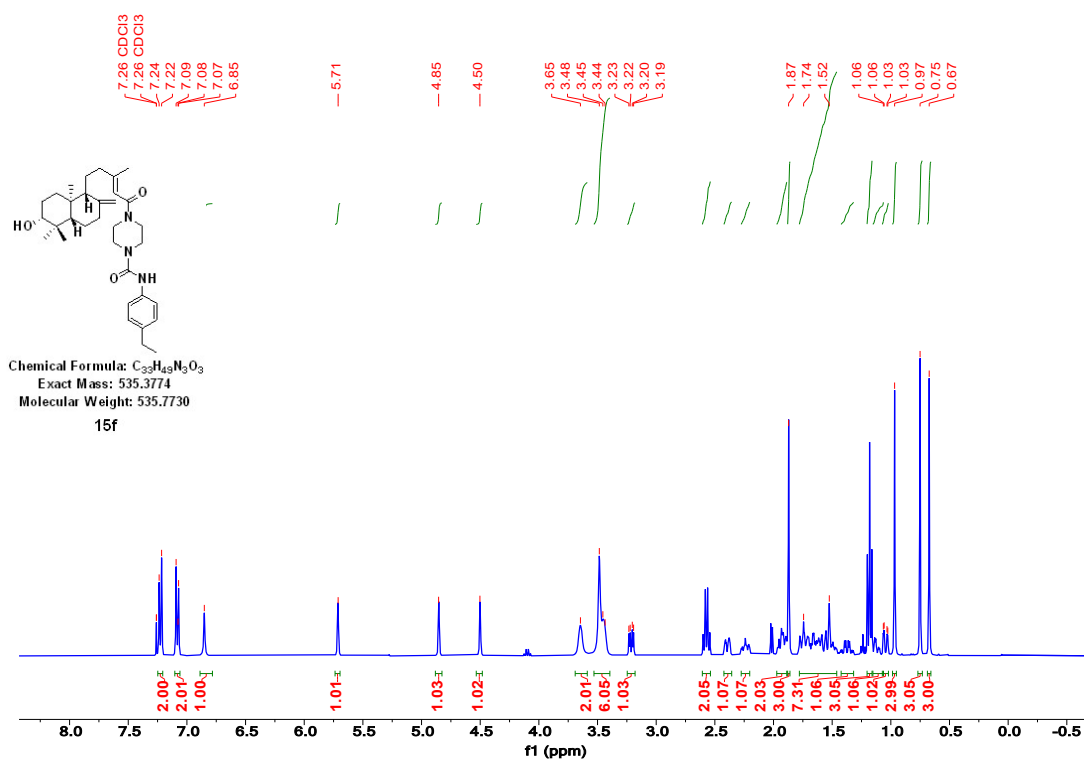

Figure S50.  $^1H$  NMR spectrum of 15f

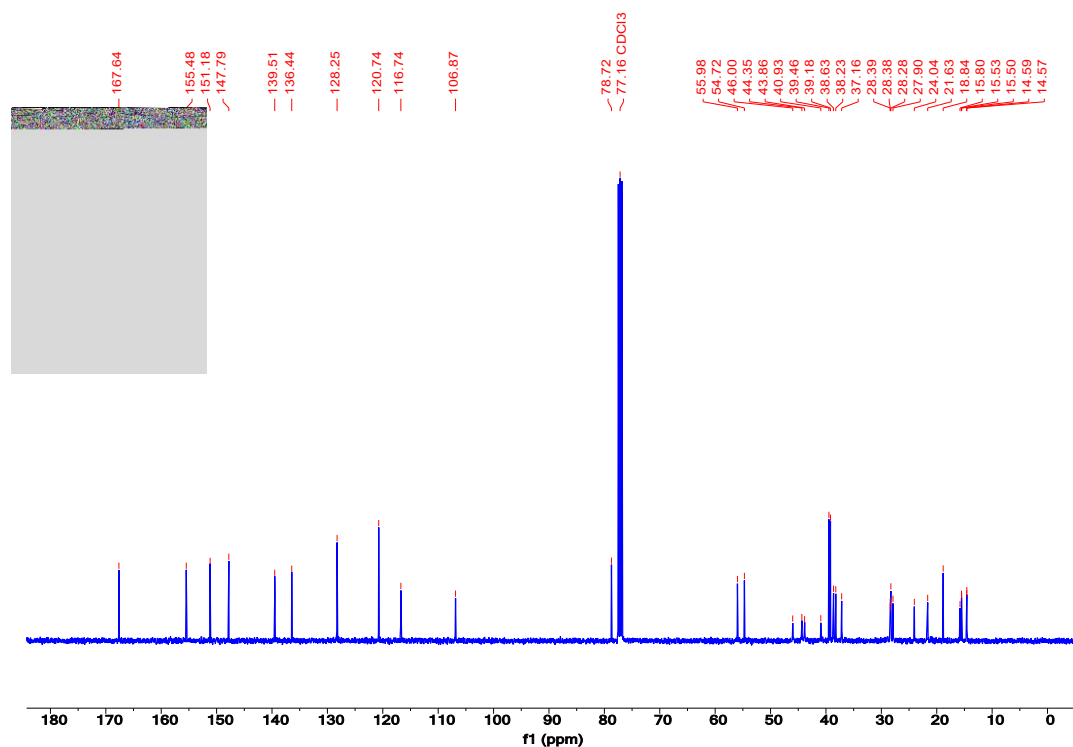

Figure S51.  $^{13}\text{C}$  NMR spectrum of 15f

**Single Mass Analysis**

Tolerance = 3.0 PPM / DBE: min = -1.5, max = 50.0

Element prediction: Off

Number of isotope peaks used for i-FIT = 3

Monoisotopic Mass, Even Electron Ions

7 formula(e) evaluated with 1 results within limits (up to 50 best isotopic matches for each mass)

Elements Used:

C: 33-34 H: 44-50 N: 3-5 O: 3-6 Na: 0-1

30  
250310-2-Q-4 18 (0.059)

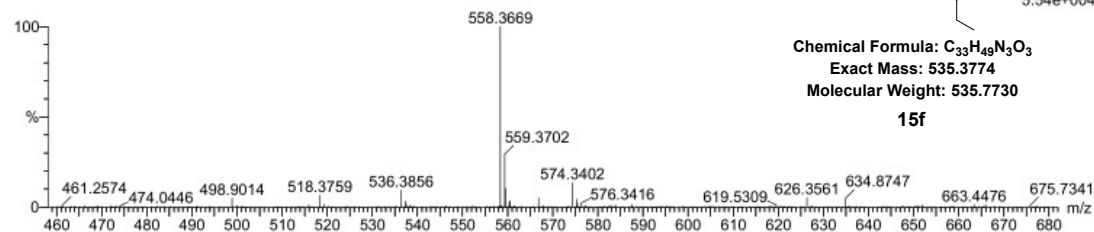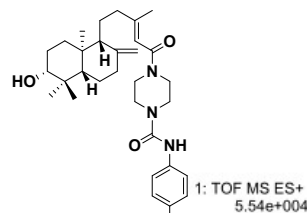

Chemical Formula:  $\text{C}_{33}\text{H}_{49}\text{N}_3\text{O}_3$

Exact Mass: 535.3774

Molecular Weight: 535.7730

**15f**

Minimum: -1.5  
Maximum: 50.0

| Mass     | Calc. Mass | mDa  | PPM  | DBE  | i-FIT | Norm | Conf (%) | Formula                                             |
|----------|------------|------|------|------|-------|------|----------|-----------------------------------------------------|
| 558.3669 | 558.3672   | -0.3 | -0.5 | 10.5 | 253.9 | n/a  | n/a      | $\text{C}_{33}\text{H}_{49}\text{N}_3\text{O}_3$ Na |

Figure S52. HRMS spectrum of 15f

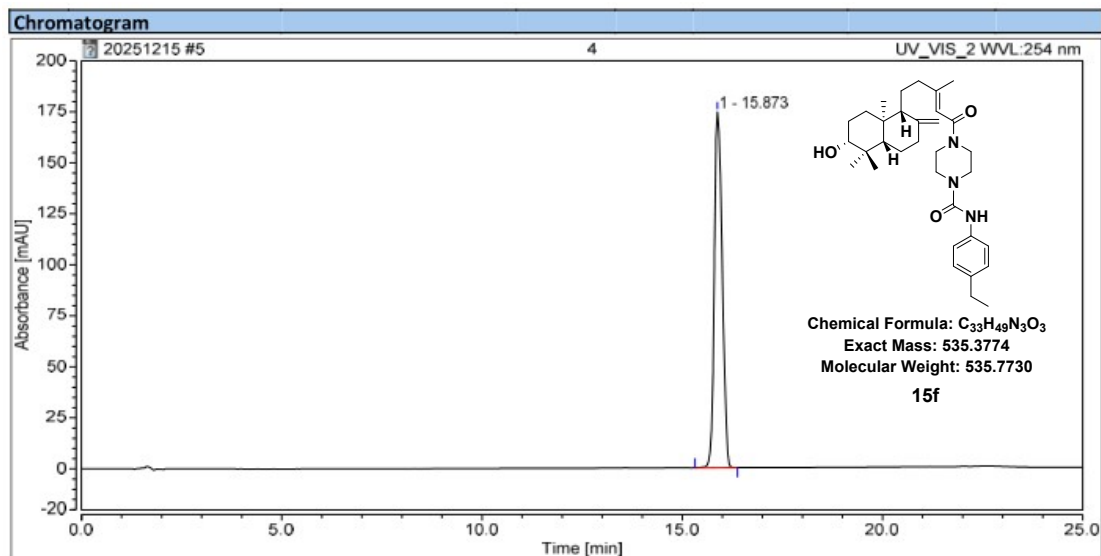

**Integration Results**

| No.           | Peak Name | Retention Time min | Area mAU*min  | Height mAU     | Relative Area % | Relative Height % | Amount n.a. |
|---------------|-----------|--------------------|---------------|----------------|-----------------|-------------------|-------------|
| 1             |           | 15.873             | 40.006        | 174.420        | 100.00          | 100.00            | n.a.        |
| <b>Total:</b> |           |                    | <b>40.006</b> | <b>174.420</b> | <b>100.00</b>   | <b>100.00</b>     |             |

**Figure S53. HPLC spectrum of 15f**

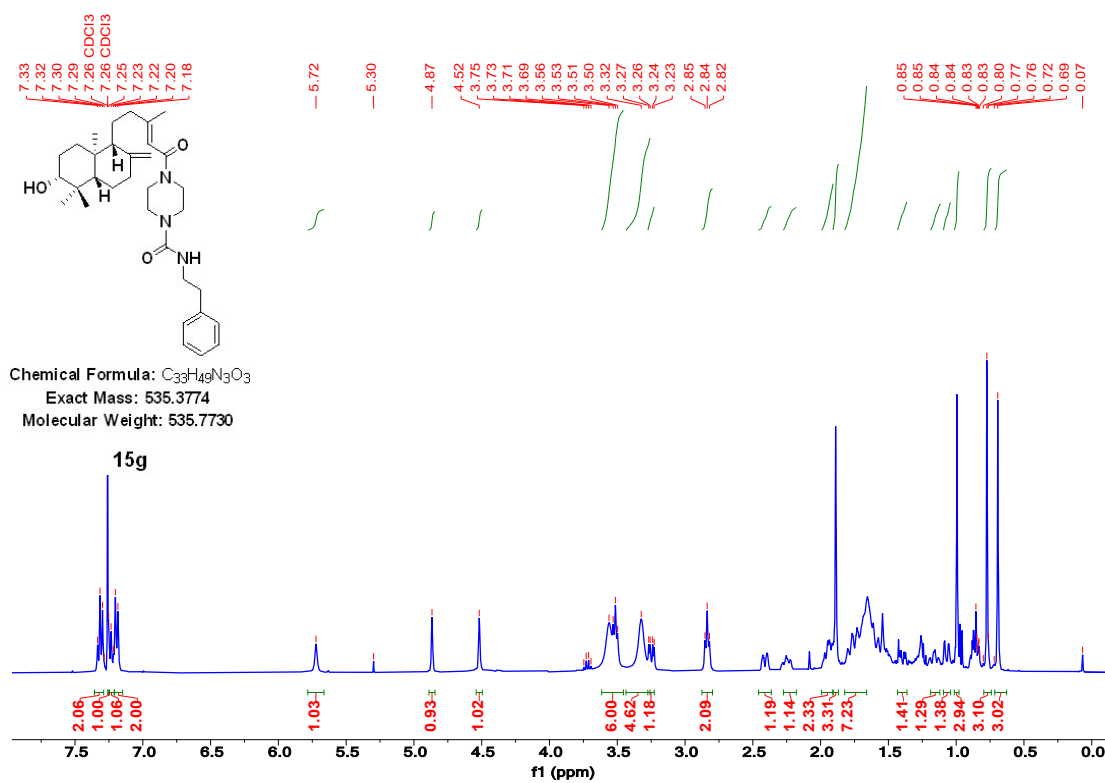

**Figure S54.  $^1H$  NMR spectrum of 15g**

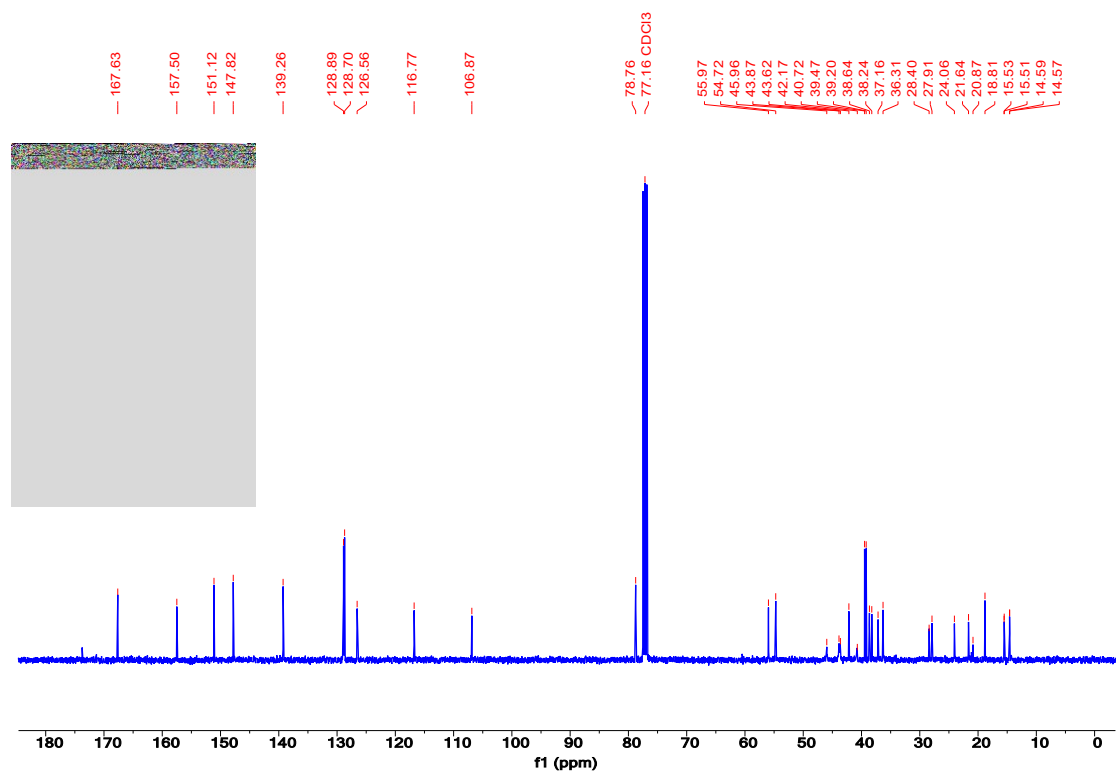

Figure S55.  $^{13}\text{C}$  NMR spectrum of 15g

### Single Mass Analysis

Tolerance = 5.0 mDa / DBE: min = -1.5, max = 50.0

Element prediction: Off

Number of isotopic peaks used for i-FIT = 3

Monoisotopic Mass, Even Electron Ions

14 formula(e) evaluated with 1 results within limits (up to 50 best isotopic matches for each mass)

Elements Used:

C: 30-35 H: 44-51 N: 2-5 O: 2-5 K: 0-1

30

250310-2-Q-6 46 (0.113)

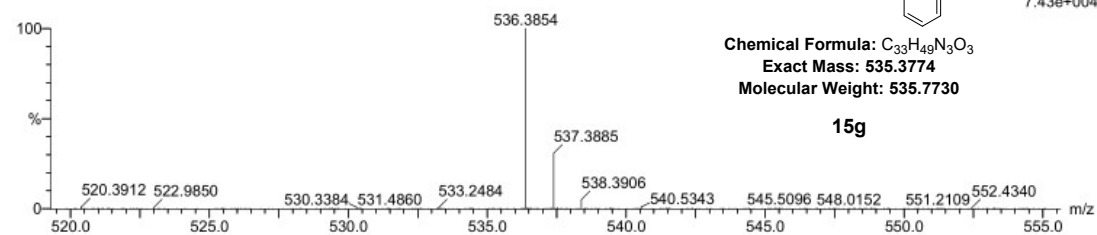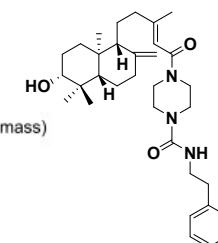

1: TOF MS ES+  
7.43e+004

Chemical Formula:  $\text{C}_{33}\text{H}_{48}\text{N}_3\text{O}_3$

Exact Mass: 535.3774

Molecular Weight: 535.7730

15g

Minimum: -1.5  
Maximum: 50.0

| Mass     | Calc. Mass | mDa | PPM | DBE  | i-FIT | Norm | Conf (%) | Formula       |
|----------|------------|-----|-----|------|-------|------|----------|---------------|
| 536.3854 | 536.3852   | 0.2 | 0.4 | 10.5 | 296.0 | n/a  | n/a      | C33 H50 N3 O3 |

Figure S56. HRMS spectrum of 15g

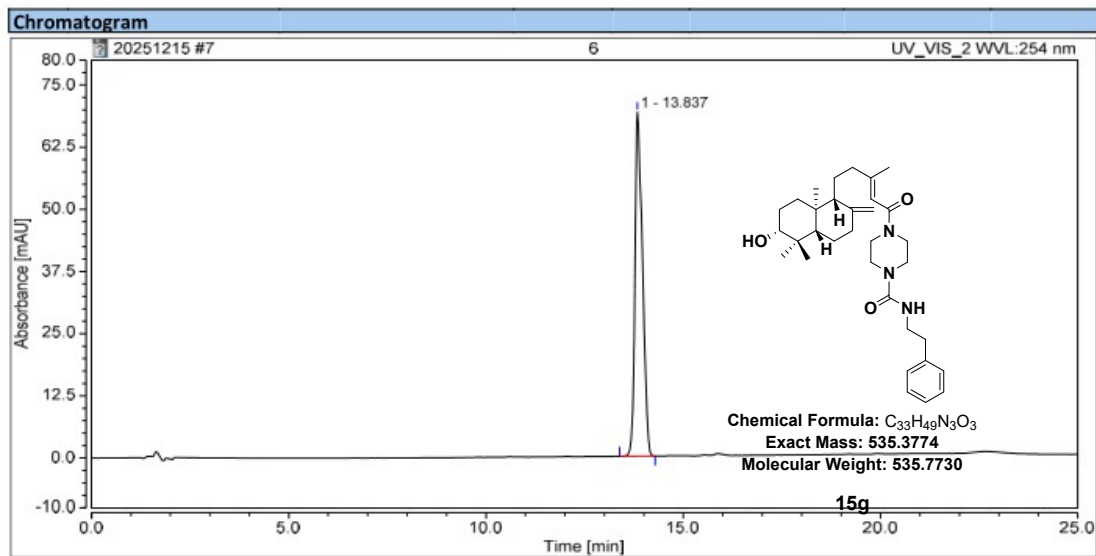

**Integration Results**

| No.           | Peak Name | Retention Time min | Area mAU*min  | Height mAU    | Relative Area % | Relative Height % | Amount |
|---------------|-----------|--------------------|---------------|---------------|-----------------|-------------------|--------|
| 1             |           | 13.837             | 15.263        | 69.196        | 100.00          | 100.00            | n.a.   |
| <b>Total:</b> |           |                    | <b>15.263</b> | <b>69.196</b> | <b>100.00</b>   | <b>100.00</b>     |        |

Figure S57. HPLC spectrum of 15g

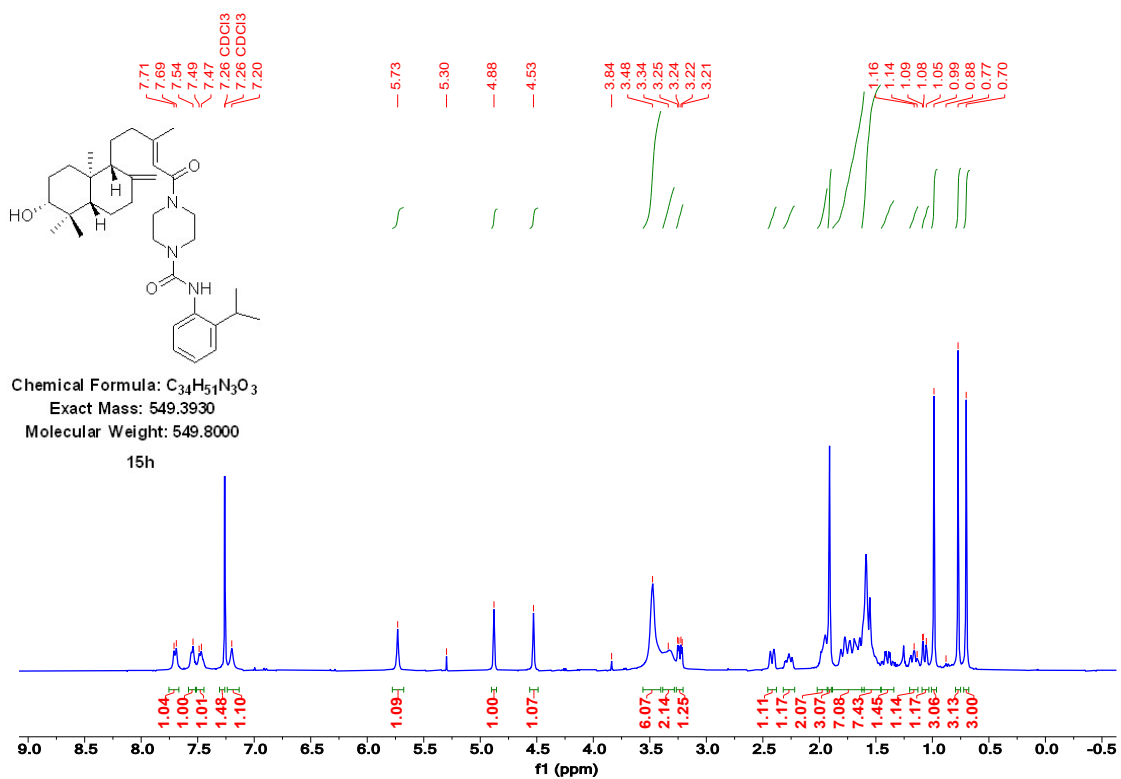

Figure S58.  $^1H$  NMR spectrum of 15h

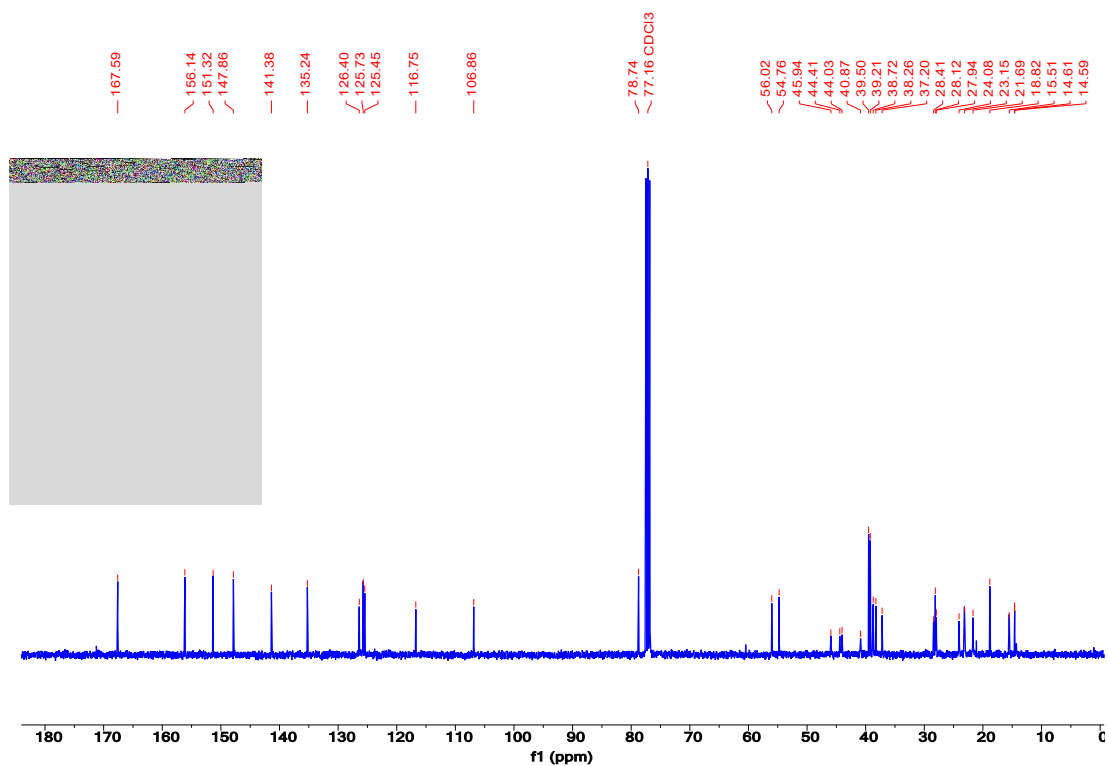

Figure S59.  $^{13}\text{C}$  NMR spectrum of 15h

**Single Mass Analysis**

Tolerance = 5.0 mDa / DBE: min = -1.5, max = 50.0

Element prediction: Off

Number of isotope peaks used for i-FIT = 3

Monoisotopic Mass, Even Electron Ions

13 formula(e) evaluated with 1 results within limits (up to 50 best isotopic matches for each mass)

Elements Used:

C: 34-34 H: 42-51 N: 2-6 O: 2-6 Na: 0-1

7

250310-2-Q-36 19 (0.061)

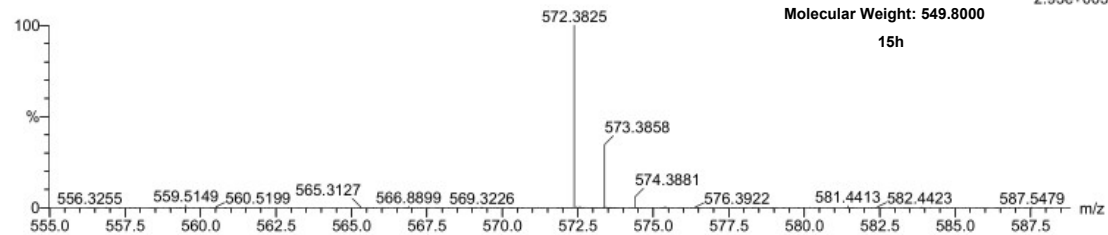

Minimum:

Maximum:

5.0 10.0 -1.5  
-0.3 -0.5 10.5

| Mass     | Calc. Mass | mDa  | PPM  | DBE  | i-FIT | Norm | Conf (%) | Formula          |
|----------|------------|------|------|------|-------|------|----------|------------------|
| 572.3825 | 572.3828   | -0.3 | -0.5 | 10.5 | 475.6 | n/a  | n/a      | C34 H51 N3 O3 Na |

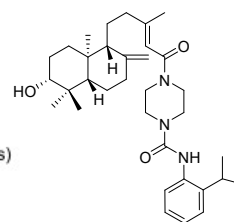

Chemical Formula:  $\text{C}_{34}\text{H}_{51}\text{N}_3\text{O}_3$ ; TOF MS ES+  
Exact Mass: 549.3930 2.93e+005  
Molecular Weight: 549.8000  
15h

Figure S60. HRMS spectrum of 15h

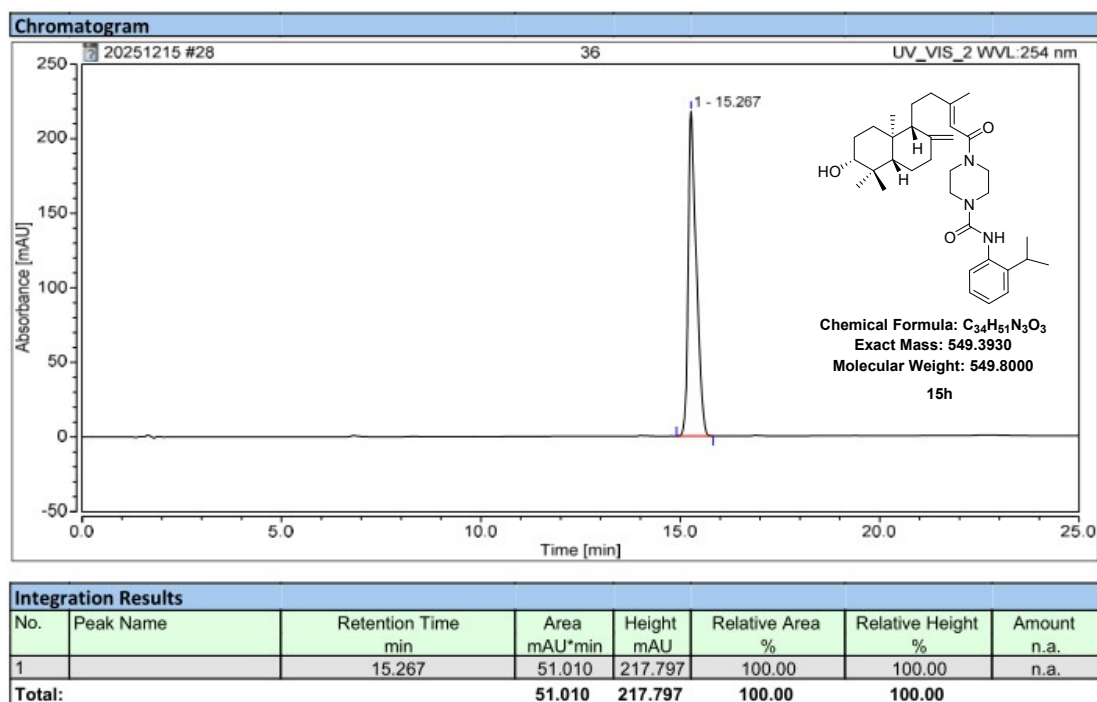

Figure S61. HPLC spectrum of 15h

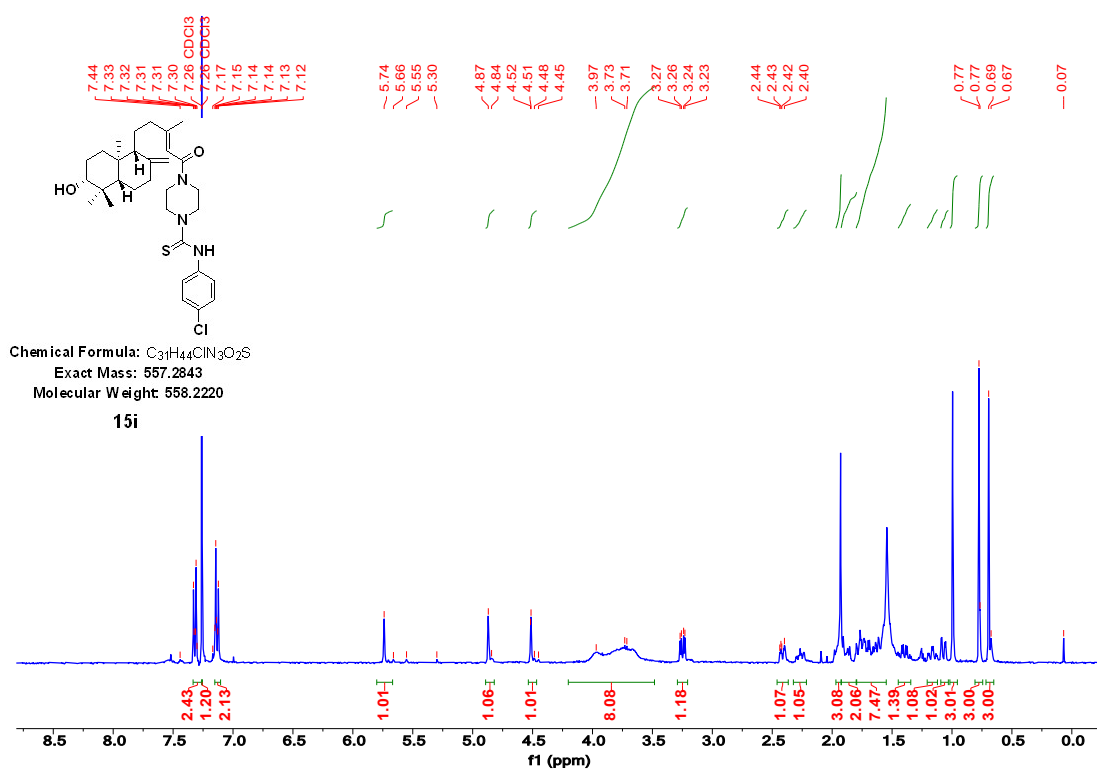

Figure S62.  $^1H$  NMR spectrum of 15i

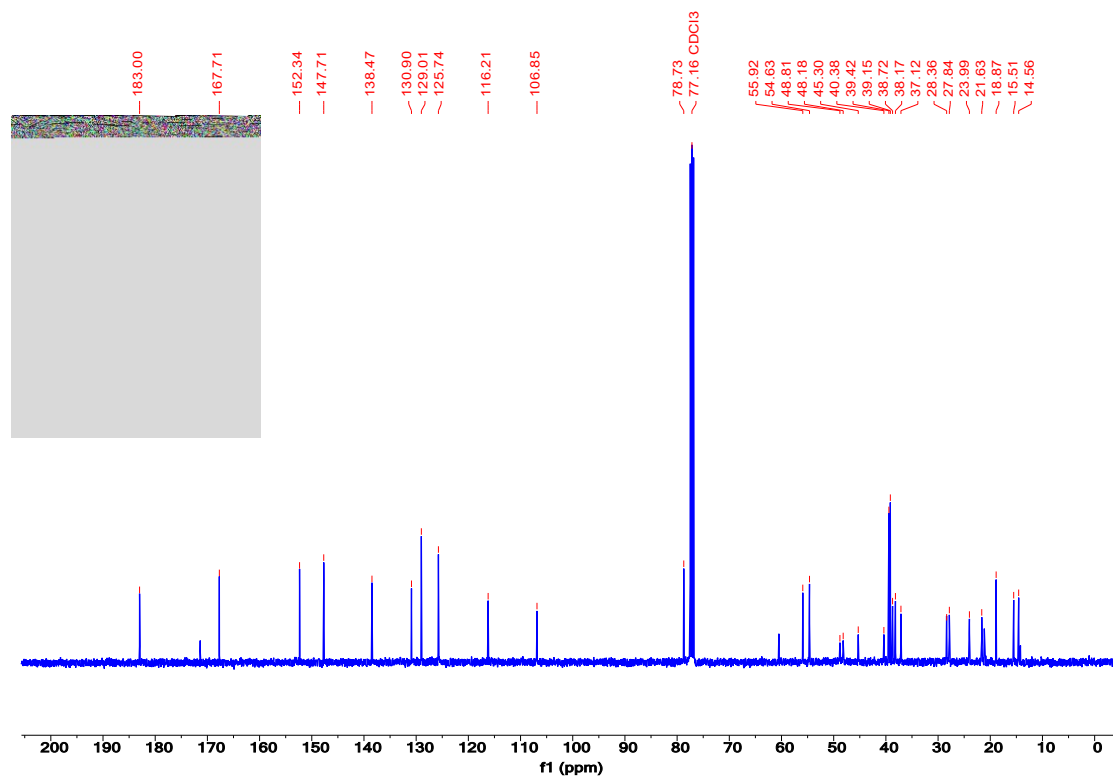

Figure S63. <sup>13</sup>C NMR spectrum of 15i

Monoisotopic Mass, Even Electron Ions

573 formula(e) evaluated with 1 results within limits (all results (up to 1000) for each mass)

Elements Used:

C: 31-31 H: 14-90 N: 1-6 O: 1-20 Cl: 1-5 K: 1-1

30

250310-2-Q-10 72 (0.162)

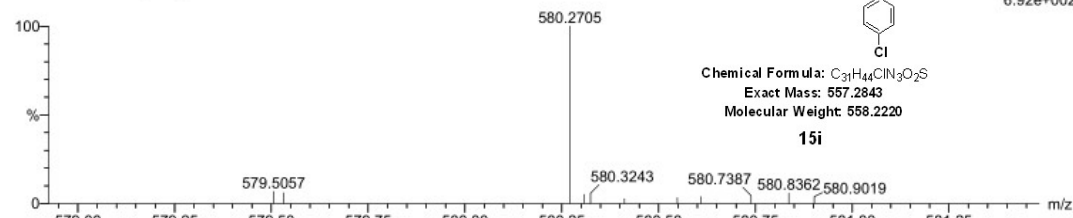

Chemical Formula: C<sub>31</sub>H<sub>44</sub>ClN<sub>3</sub>O<sub>2</sub>S

Exact Mass: 557.2843

Molecular Weight: 558.2220

15i

1: TOF MS ES+  
6.92e+002

Minimum: -1.5  
Maximum: 5.0 5.0 50.0

| Mass     | Calc. Mass | mDa  | PPM  | DBE  | i-FIT | Norm | Conf(%) | Formula                                                            |
|----------|------------|------|------|------|-------|------|---------|--------------------------------------------------------------------|
| 580.2705 | 580.2708   | -0.3 | -0.5 | 10.5 | 78.0  | n/a  | n/a     | C <sub>31</sub> H <sub>44</sub> N <sub>3</sub> O <sub>3</sub> Cl K |

Figure S64. HRMS spectrum of 15i

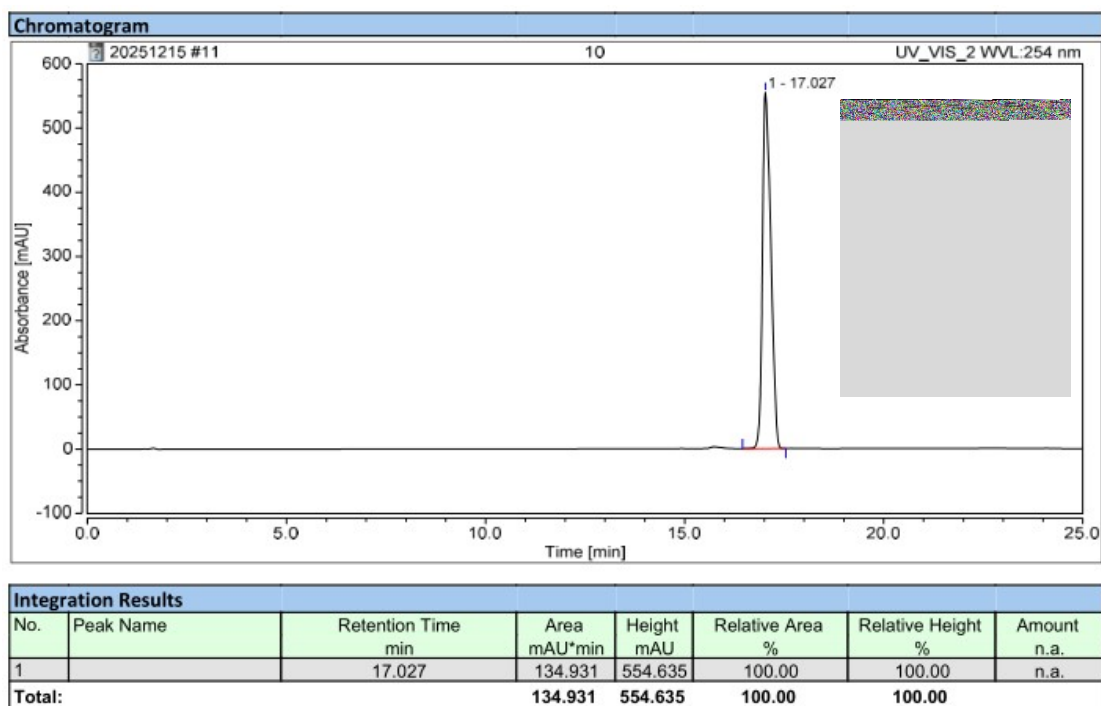

**Figure S65. HPLC spectrum of 15i**

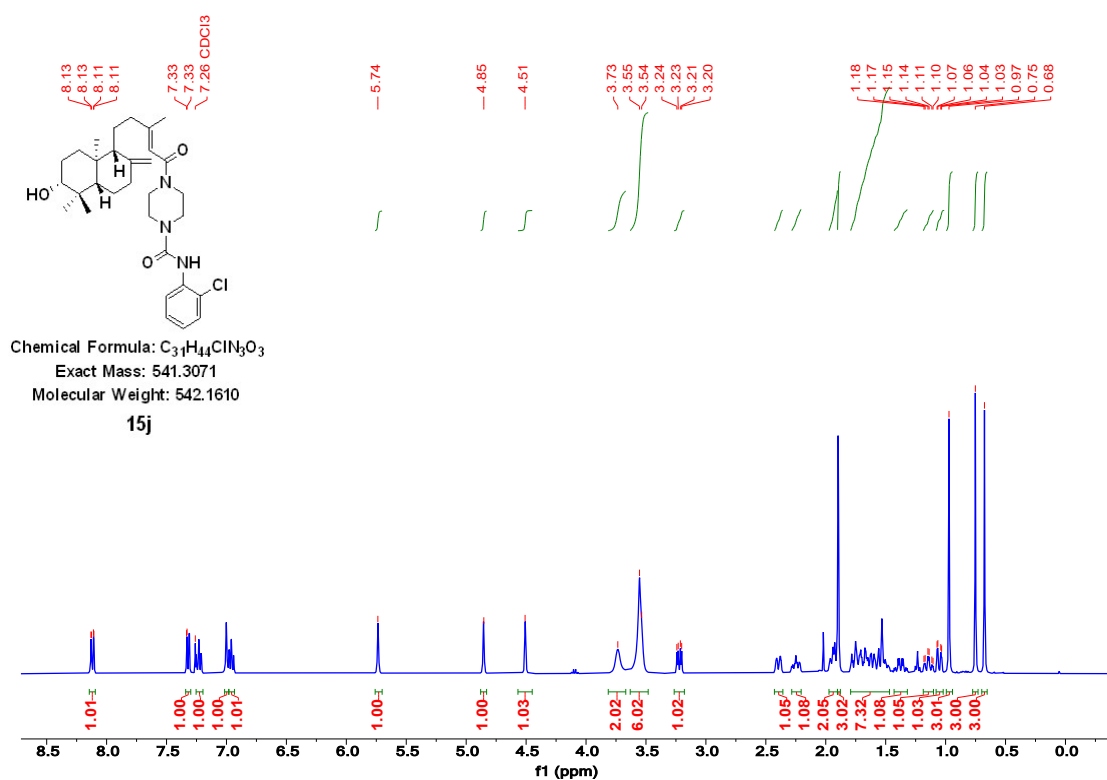

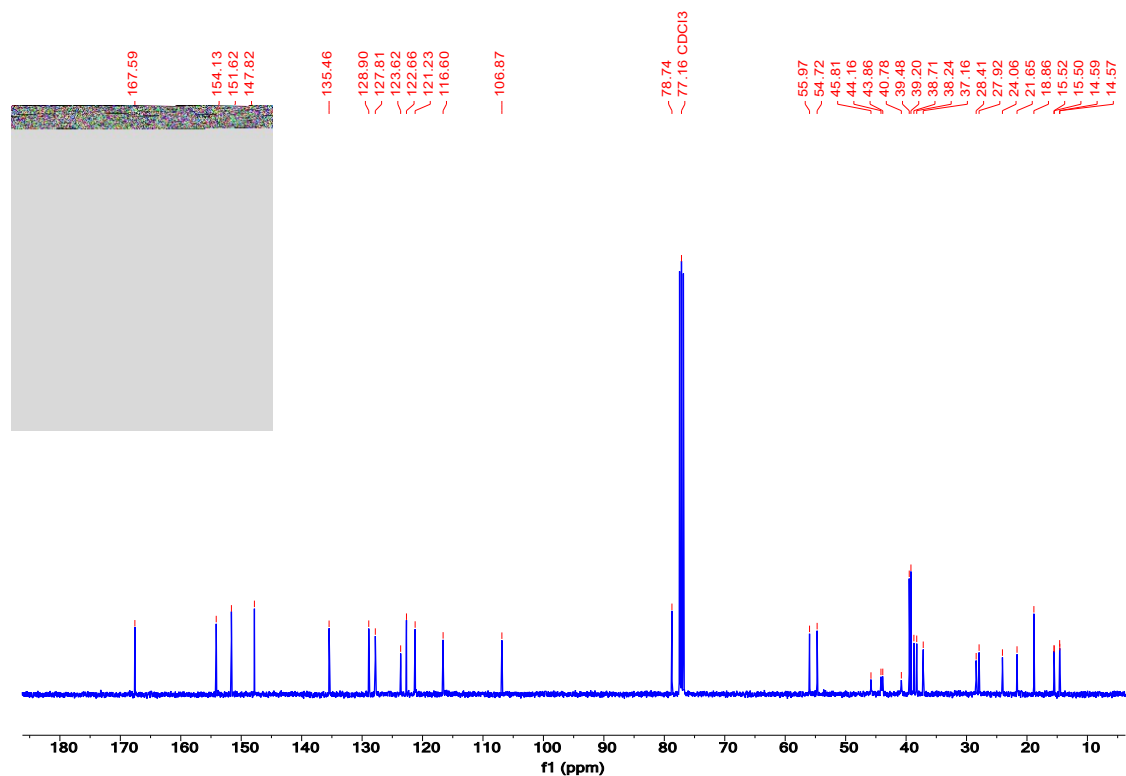

Figure S67. <sup>13</sup>C NMR spectrum of 15j

#### Single Mass Analysis

Tolerance = 5.0 mDa / DBE: min = -1.5, max = 50.0

Element prediction: Off

Number of isotope peaks used for i-FIT = 3

Monoisotopic Mass, Even Electron Ions

32 formula(e) evaluated with 1 results within limits (up to 50 best isotopic matches for each mass)

Elements Used:

C: 30-35 H: 44-51 N: 2-5 O: 2-5 Cl: 0-1 Na: 0-1

30

250310-2-Q-7 53 (0.126)

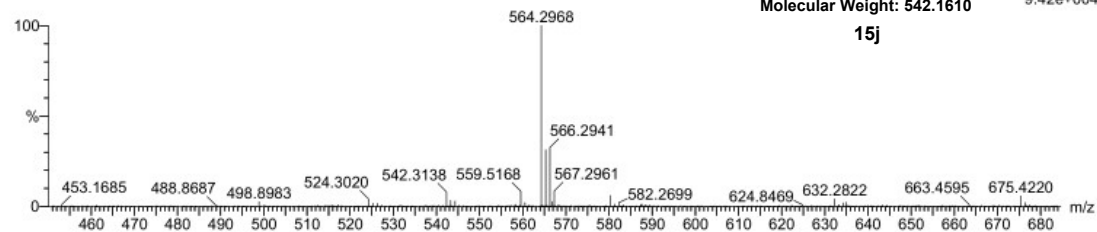

Minimum: -1.5  
Maximum: 5.0 10.0 50.0

| Mass     | Calc. Mass | mDa  | PPM  | DBE  | i-FIT | Norm | Conf(%) | Formula             |
|----------|------------|------|------|------|-------|------|---------|---------------------|
| 564.2968 | 564.2969   | -0.1 | -0.2 | 10.5 | 334.7 | n/a  | n/a     | C31 H44 N3 O3 Cl Na |

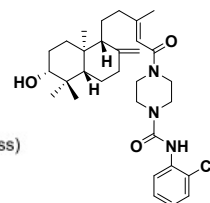

Chemical Formula: C<sub>31</sub>H<sub>44</sub>ClN<sub>3</sub>O<sub>3</sub>  
Exact Mass: 541.3071 1: TOF MS ES+  
Molecular Weight: 542.1610 9.42e+004  
**15j**

Figure S68. HRMS spectrum of 15j

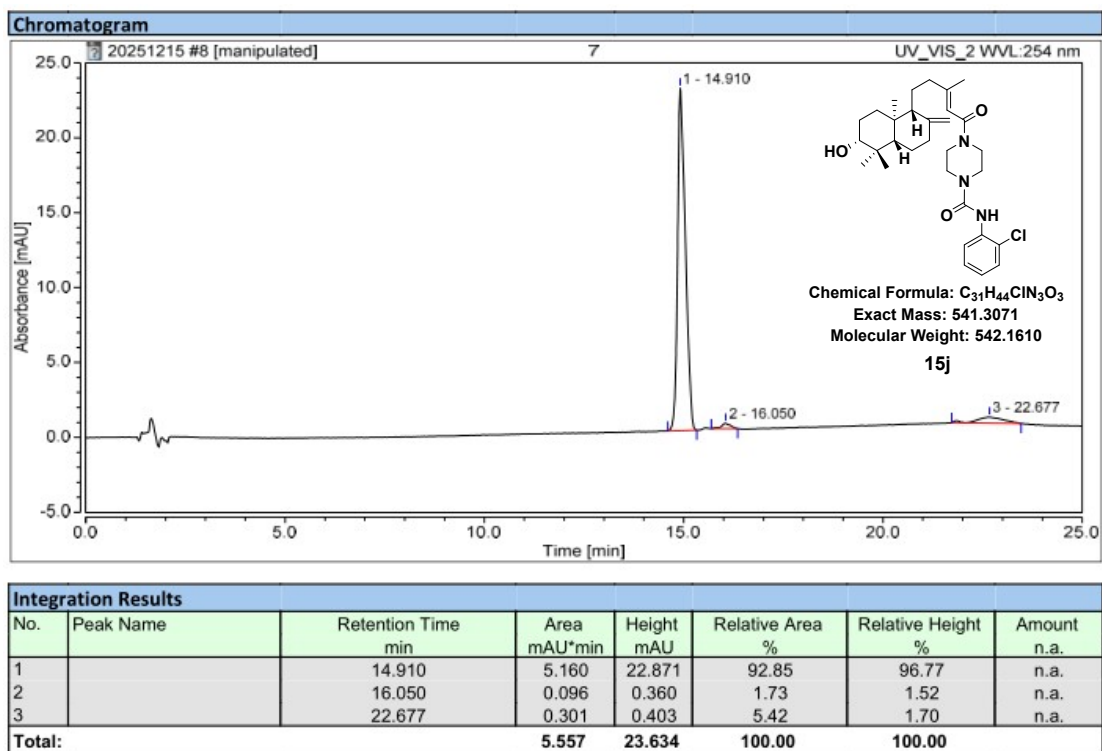

Figure S69. HPLC spectrum of 15j

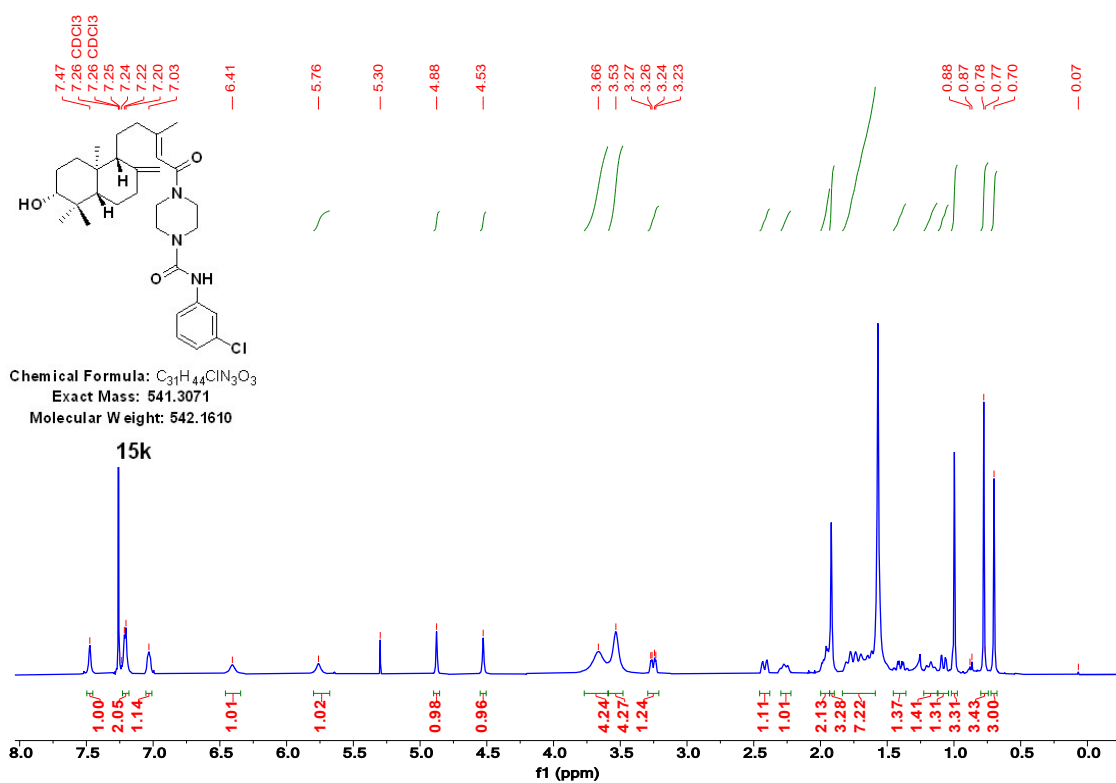

Figure S70.  $^1H$  NMR spectrum of 15k

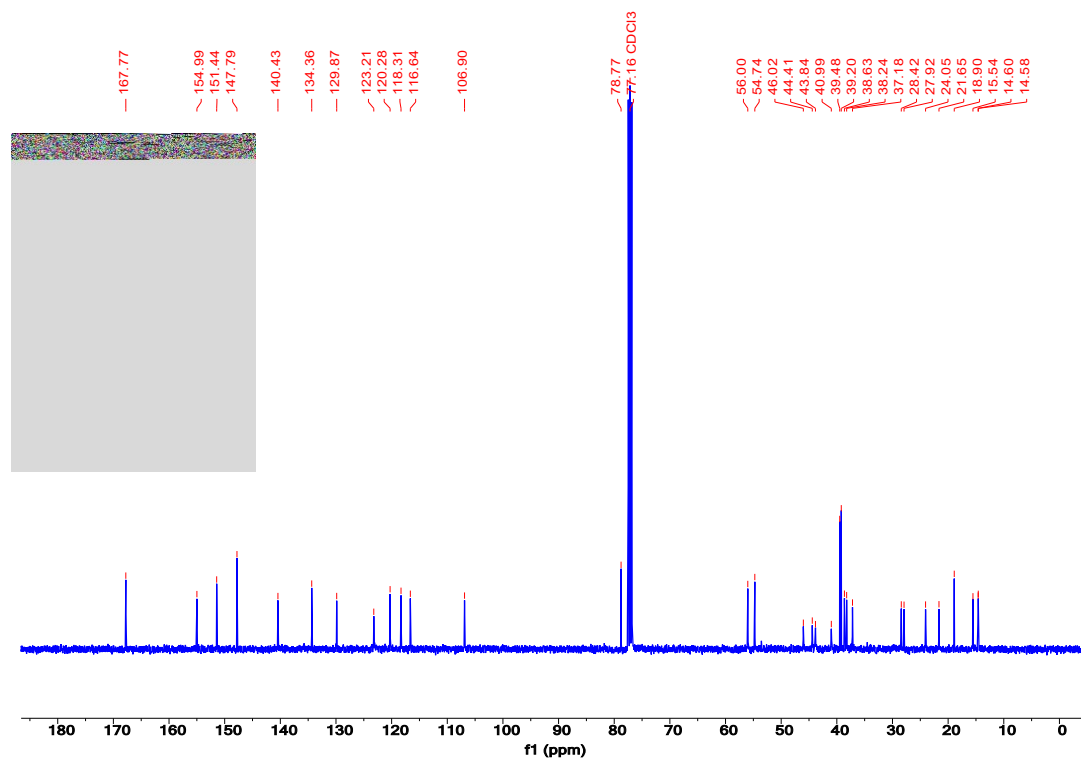

Figure S71.  $^{13}\text{C}$  NMR spectrum of 15k

#### Single Mass Analysis

Tolerance = 5.0 mDa / DBE: min = -1.5, max = 50.0

Element prediction: Off

Number of isotope peaks used for i-FIT = 3

Monoisotopic Mass, Even Electron Ions

32 formula(e) evaluated with 1 results within limits (up to 50 best isotopic matches for each mass)

Elements Used:

C: 30-35 H: 44-51 N: 2-5 O: 2-5 Na: 0-1 Cl: 0-1

30

250310-2-Q-8 20 (0.063)

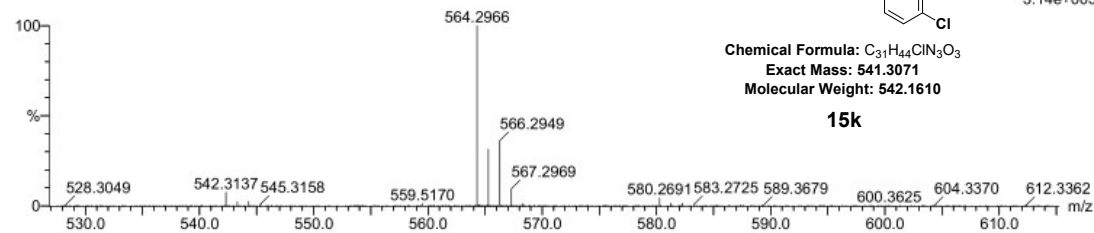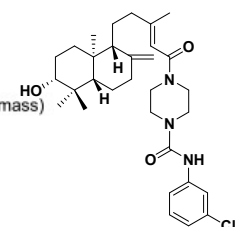

1: TOF MS ES+  
3.14e+005

Chemical Formula:  $\text{C}_{31}\text{H}_{44}\text{ClN}_3\text{O}_3$   
Exact Mass: 541.3071  
Molecular Weight: 542.1610

15k

Minimum: -1.5  
Maximum: 5.0 10.0 50.0

| Mass     | Calc. Mass | mDa  | PPM  | DBE  | i-FIT | Norm | Conf (%) | Formula             |
|----------|------------|------|------|------|-------|------|----------|---------------------|
| 564.2966 | 564.2969   | -0.3 | -0.5 | 10.5 | 466.1 | n/a  | n/a      | C31 H44 N3 O3 Na Cl |

Figure S72. HRMS spectrum of 15k

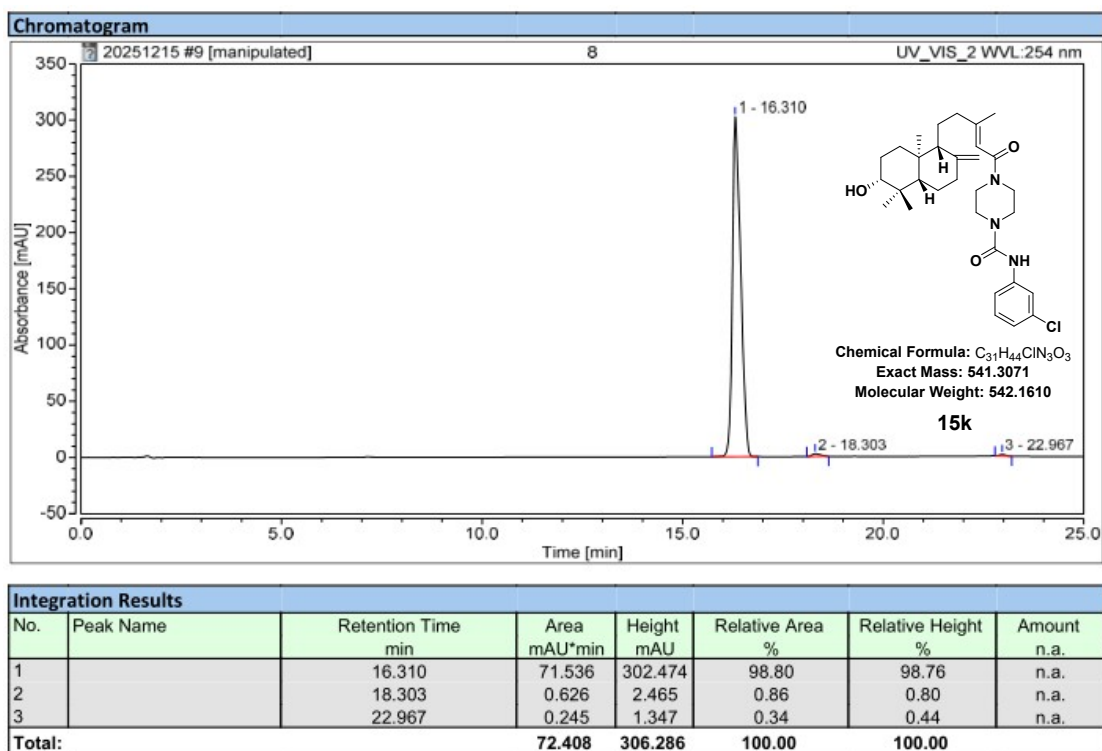

Figure S73. HPLC spectrum of 15k

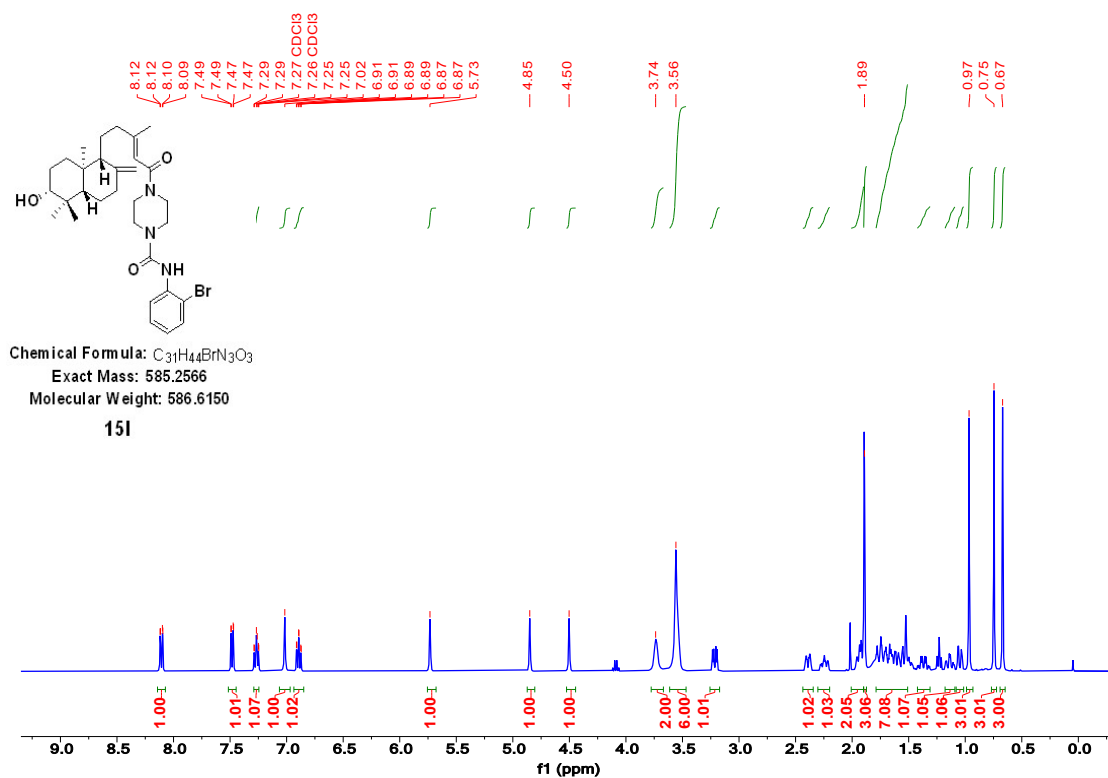

Figure S74.  $^1H$  NMR spectrum of 15l

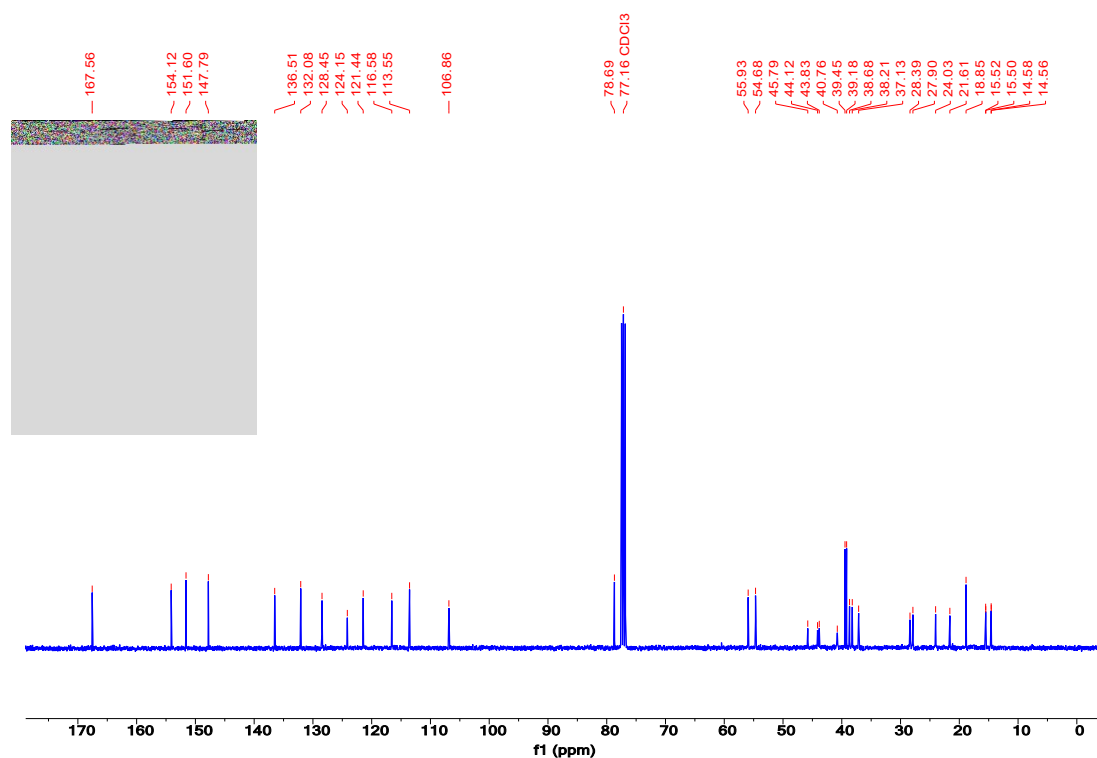

Figure S75. <sup>13</sup>C NMR spectrum of 15I

#### Single Mass Analysis

Tolerance = 5.0 PPM / DBE: min = -1.5, max = 50.0

Element prediction: Off

Number of isotope peaks used for i-FIT = 3

Monoisotopic Mass, Even Electron Ions

878 formula(e) evaluated with 1 results within limits (all results (up to 1000) for each mass)

Elements Used:

C: 31-31 H: 16-50 N: 1-3 O: 1-20 Na: 1-8 Br: 1-2

7

250310-2-Q-11 22 (0.067)

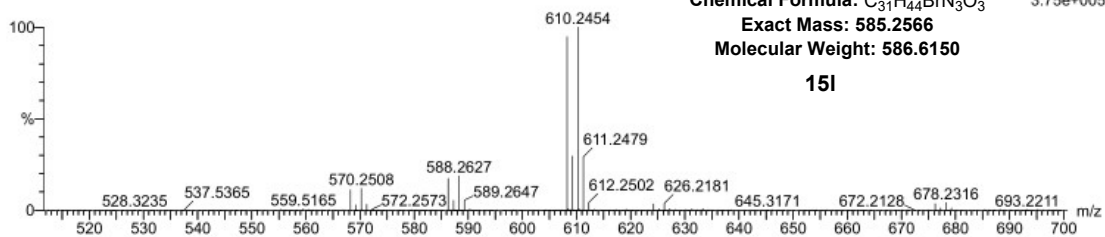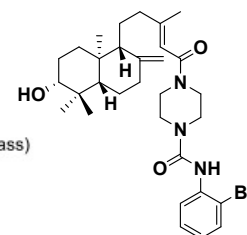

Chemical Formula: C<sub>31</sub>H<sub>44</sub>BrN<sub>3</sub>O<sub>3</sub>  
 Exact Mass: 585.2566  
 Molecular Weight: 586.6150

15I

1: TOF MS ES+  
 3.75e+005

Minimum: -1.5  
 Maximum: 50.0

| Mass     | Calc. Mass | mDa | PPM | DBE  | i-FIT | Norm | Conf (%) | Formula             |
|----------|------------|-----|-----|------|-------|------|----------|---------------------|
| 608.2466 | 608.2464   | 0.2 | 0.3 | 10.5 | 643.0 | n/a  | n/a      | C31 H44 N3 O3 Na Br |

Figure S76. HRMS spectrum of 15I

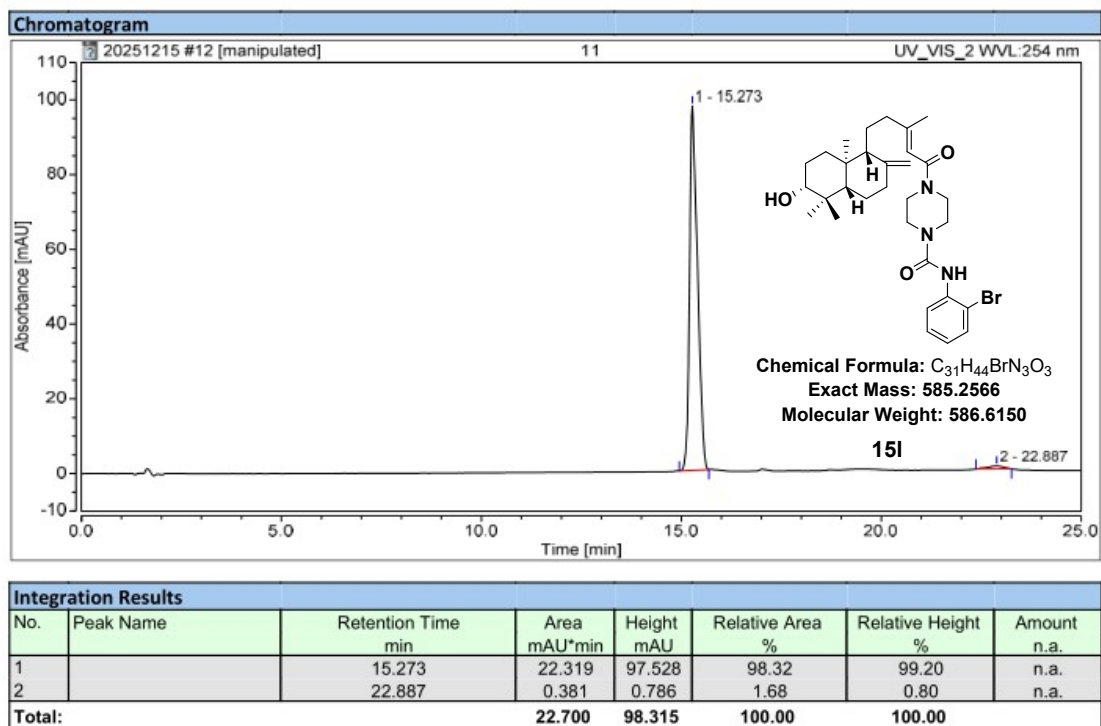

Figure S77. HPLC spectrum of 15I

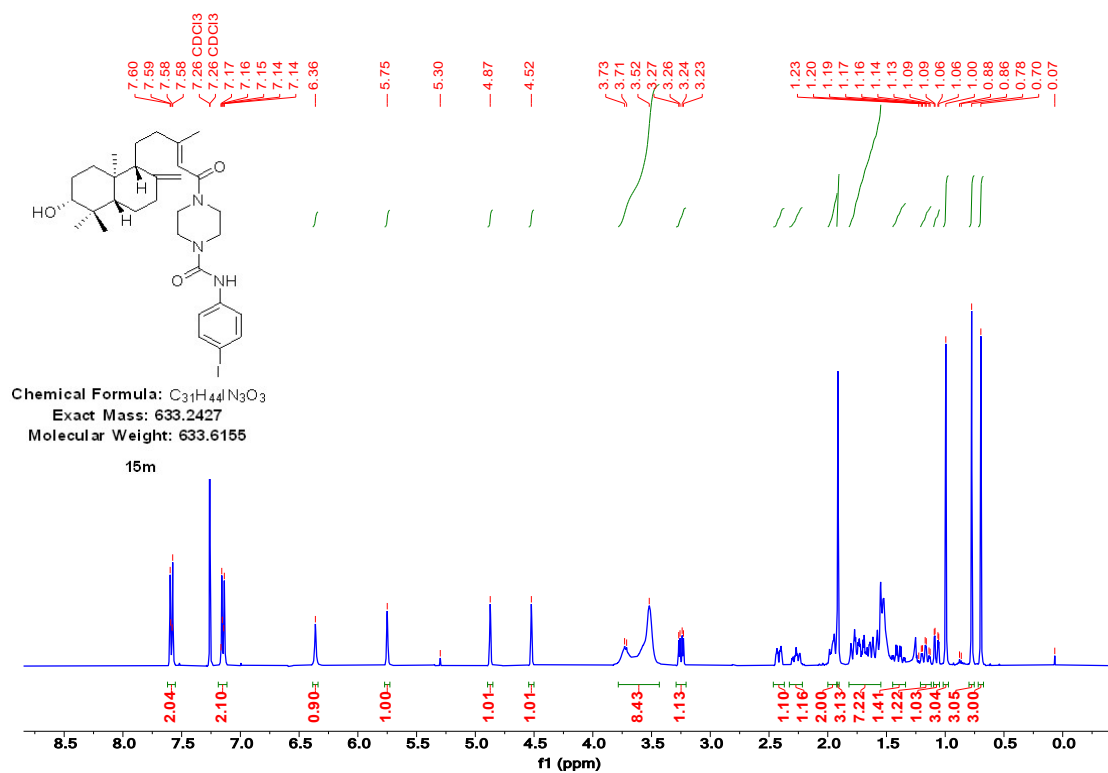

Figure S78. <sup>1</sup>H NMR spectrum of 15m

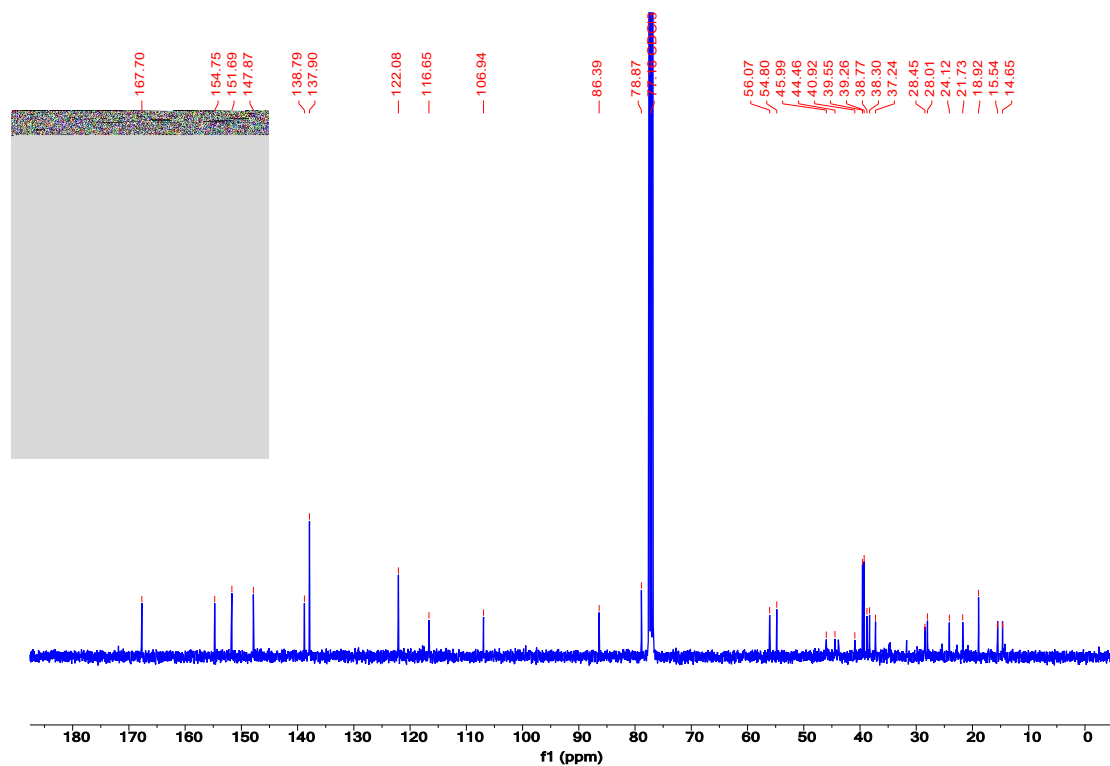

Figure S79.  $^{13}\text{C}$  NMR spectrum of 15m

**Single Mass Analysis**

Tolerance = 5.0 mDa / DBE: min = -1.5, max = 50.0

Element prediction: Off

Number of isotope peaks used for i-FIT = 3

Monoisotopic Mass, Even Electron Ions

112 formula(e) evaluated with 1 results within limits (up to 50 best isotopic matches for each mass)

Elements Used:

C: 29-56 H: 44-85 N: 2-6 O: 2-6 I: 0-1

7

250310-2-Q-22 27 (0.076)

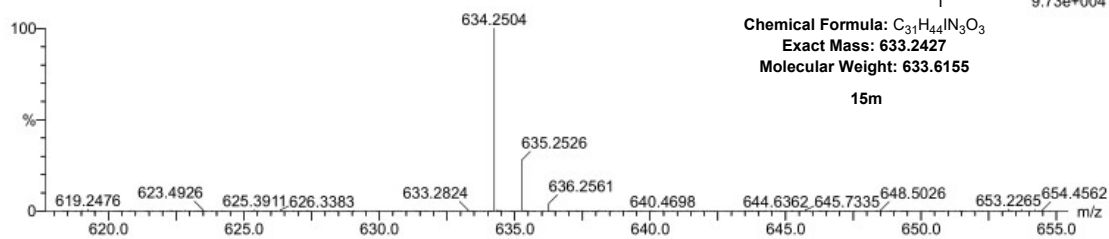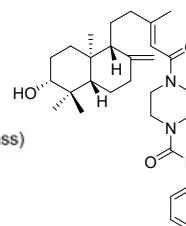

1: TOF MS ES+  
9.73e+004

Chemical Formula:  $\text{C}_{31}\text{H}_{44}\text{IN}_3\text{O}_3$

Exact Mass: 633.2427

Molecular Weight: 633.6155

15m

Minimum: -1.5  
Maximum: 5.0 10.0 50.0

| Mass     | Calc. Mass | mDa  | PPM  | DBE  | i-FIT | Norm | Conf (%) | Formula         |
|----------|------------|------|------|------|-------|------|----------|-----------------|
| 634.2504 | 634.2506   | -0.2 | -0.3 | 10.5 | 337.7 | n/a  | n/a      | C31 H45 N3 O3 I |

Figure S80. HRMS spectrum of 15m

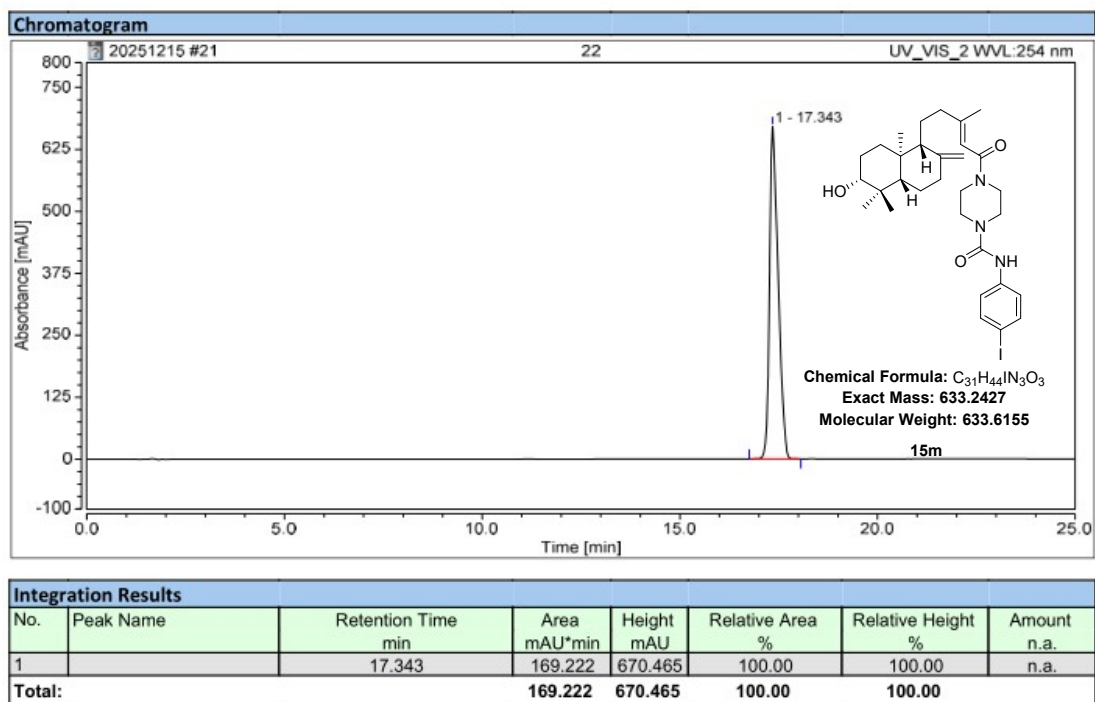

Figure S81. HPLC spectrum of 15m

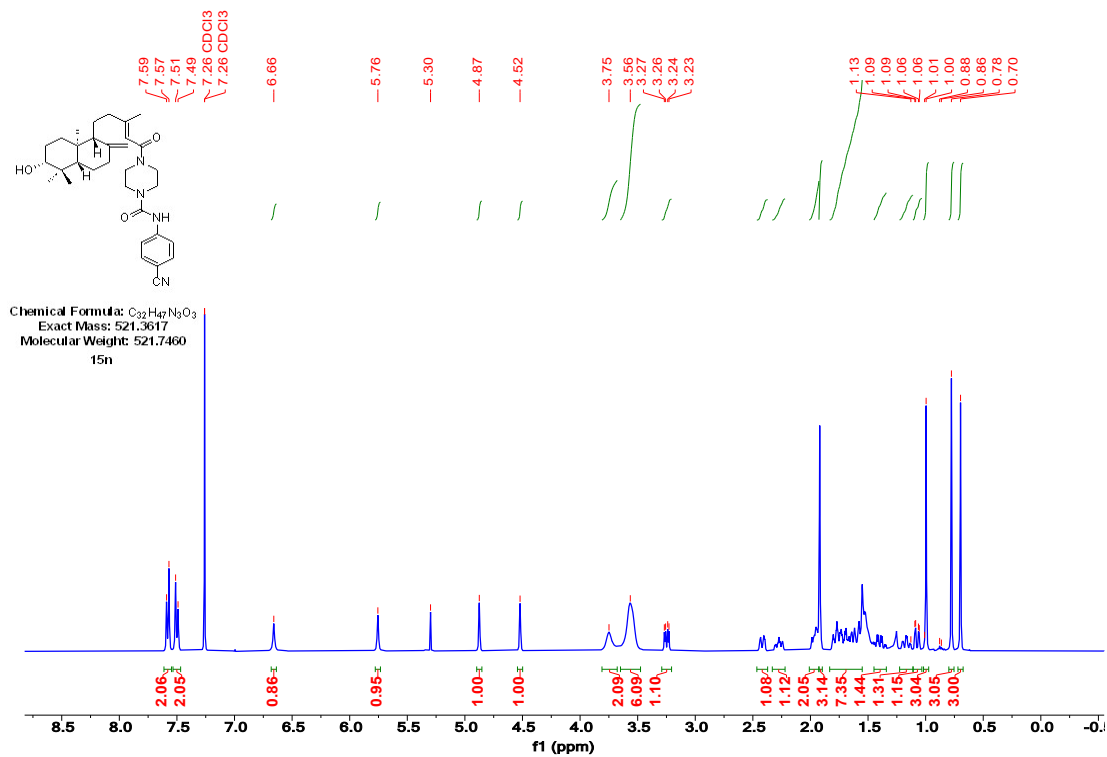

Figure S82.  $^1H$  NMR spectrum of 15n

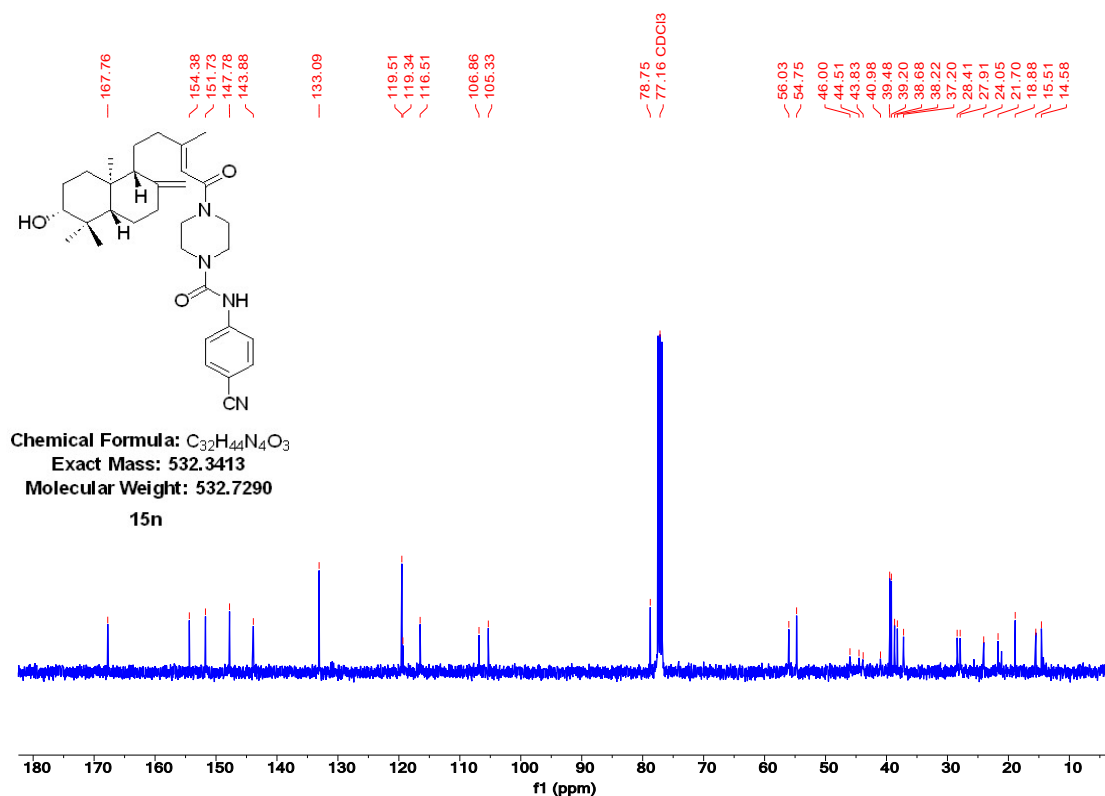

Figure S83.  $^{13}C$  NMR spectrum of 15n

**Single Mass Analysis**

Tolerance = 5.0 mDa / DBE: min = -1.5, max = 50.0

Element prediction: Off

Number of isotope peaks used for i-FIT = 3

Monoisotopic Mass, Even Electron Ions

18 formula(e) evaluated with 1 results within limits (up to 50 best isotopic matches for each mass)

Elements Used:

C: 32-37 H: 44-49 N: 2-6 O: 2-6 Na: 0-1

7

250310-2-Q-28 27 (0.076)

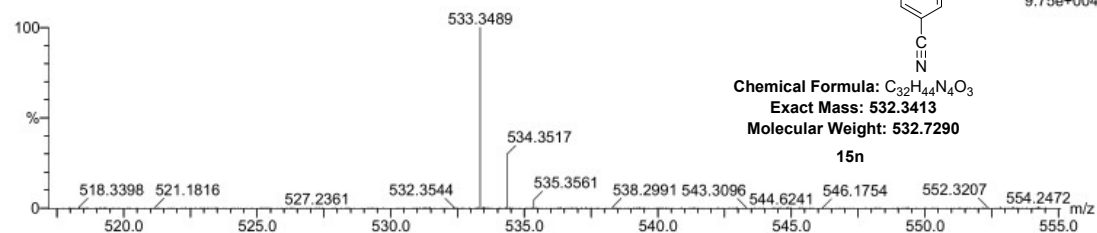

Minimum: -1.5  
 Maximum: 50.0

| Mass     | Calc. Mass | mDa  | PPM  | DBE  | i-FIT | Norm | Conf(%) | Formula       |
|----------|------------|------|------|------|-------|------|---------|---------------|
| 533.3489 | 533.3492   | -0.3 | -0.6 | 12.5 | 340.0 | n/a  | n/a     | C32 H45 N4 O3 |

Figure S84. HRMS spectrum of 15n

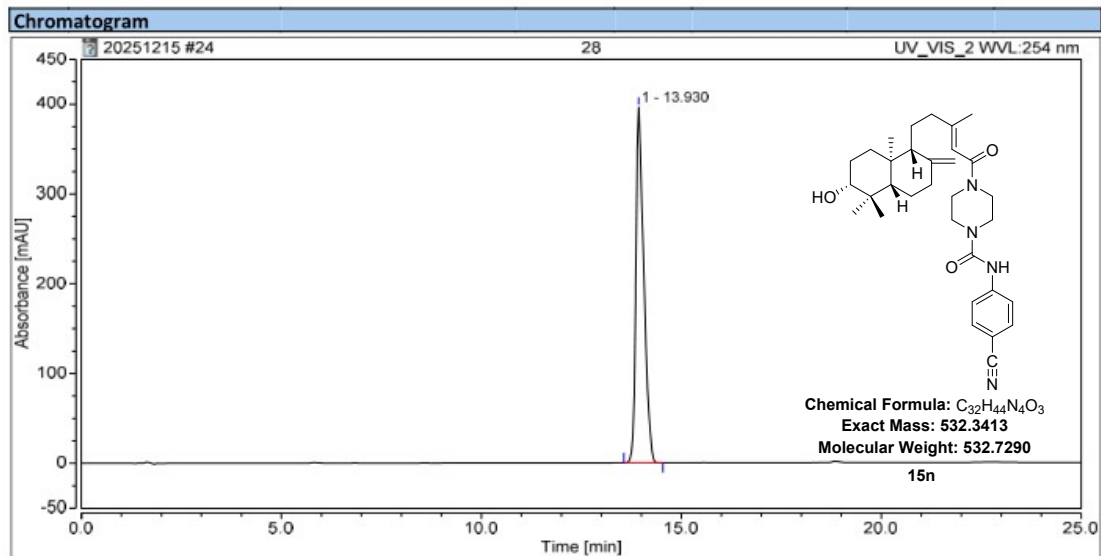

**Integration Results**

| No.           | Peak Name | Retention Time min | Area mAU*min  | Height mAU     | Relative Area % | Relative Height % | Amount n.a. |
|---------------|-----------|--------------------|---------------|----------------|-----------------|-------------------|-------------|
| 1             |           | 13.930             | 90.274        | 396.385        | 100.00          | 100.00            | n.a.        |
| <b>Total:</b> |           |                    | <b>90.274</b> | <b>396.385</b> | <b>100.00</b>   | <b>100.00</b>     |             |

**Figure S85. HPLC spectrum of 15n**

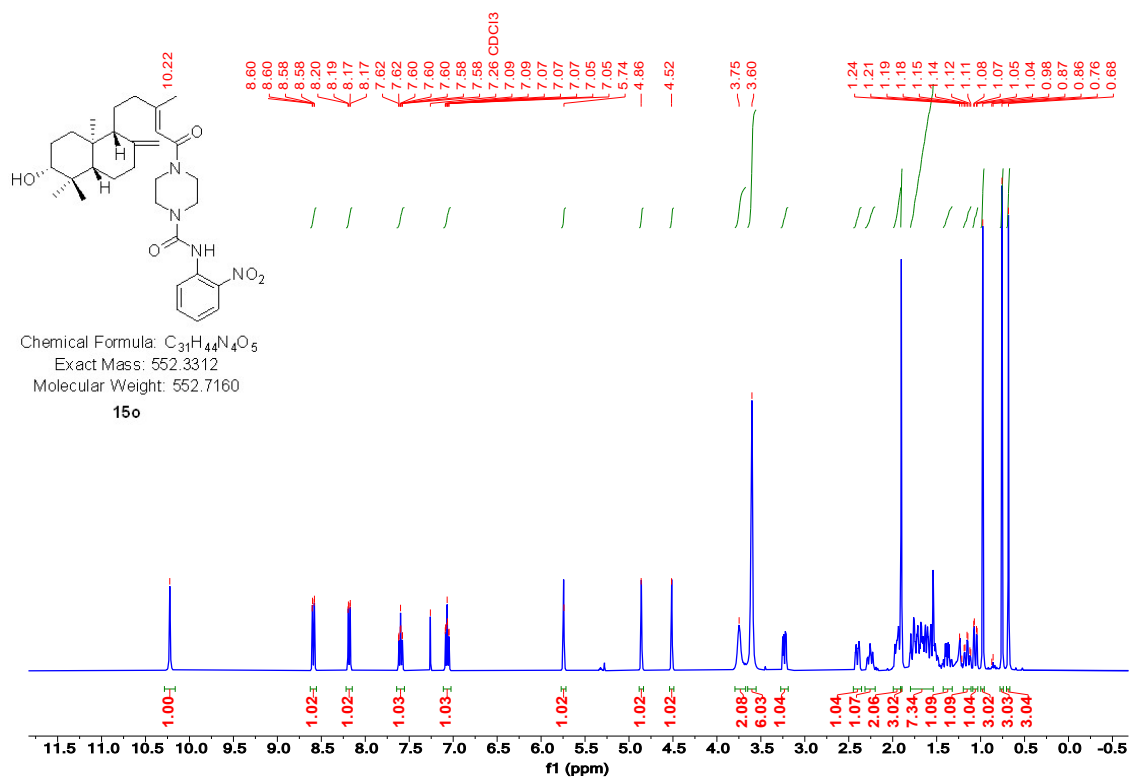

**Figure S86.  $^1H$  NMR spectrum of 15o**

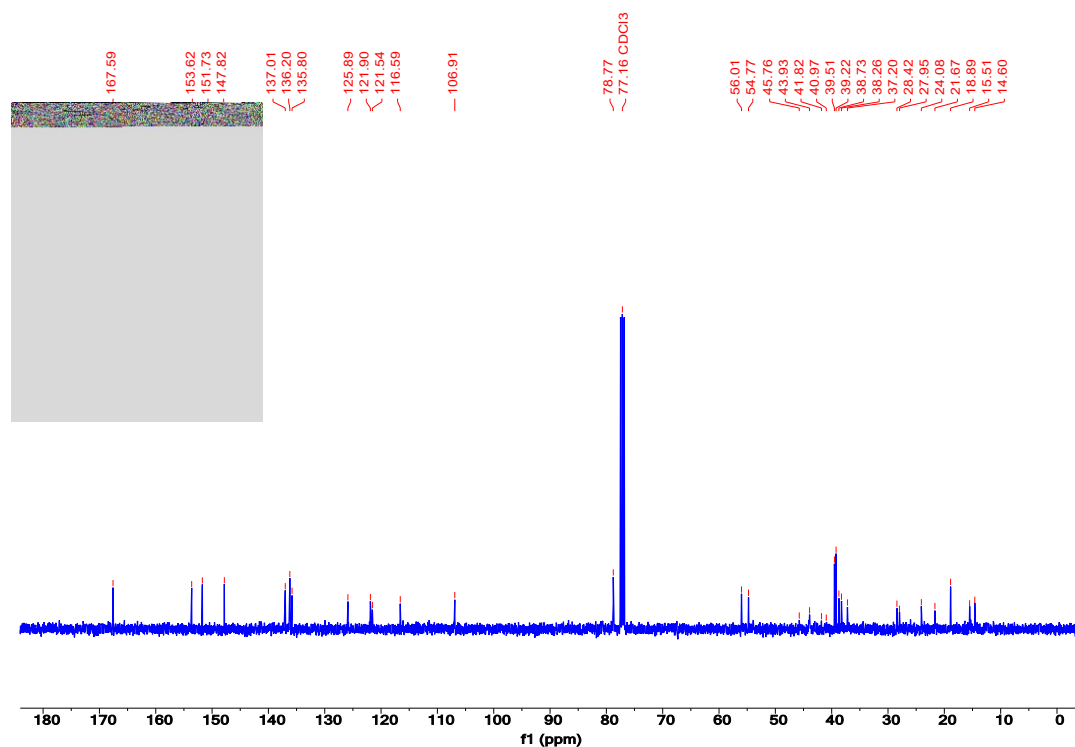

Figure S87.  $^{13}\text{C}$  NMR spectrum of **15o**

**Single Mass Analysis**

Tolerance = 5.0 mDa / DBE: min = -1.5, max = 50.0

Element prediction: Off

Number of isotope peaks used for i-FIT = 3

Monoisotopic Mass, Even Electron Ions

3 formula(e) evaluated with 1 results within limits (up to 50 best isotopic matches for each mass)

Elements Used:

C: 29-31 H: 44-45 N: 2-6 O: 2-6

7

250310-2-Q-24 34 (0.090)

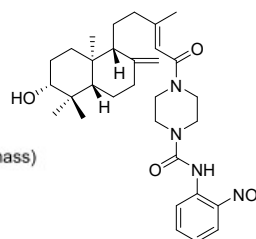

Chemical Formula:  $\text{C}_{31}\text{H}_{44}\text{N}_4\text{O}_5$   
 Exact Mass: 552.3312  
 Molecular Weight: 552.7160

1: TOF MS ES+  
2.26e+005

**15o**

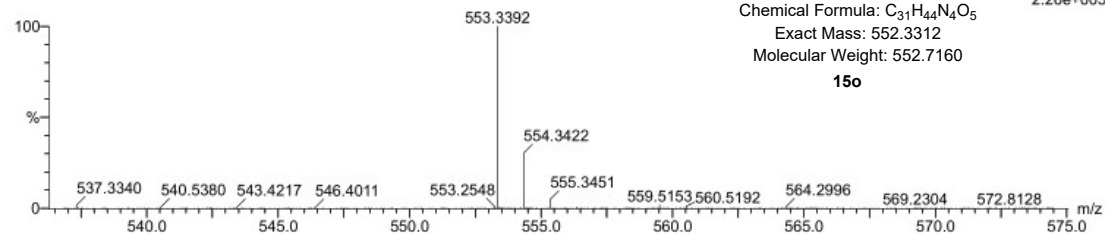

Minimum: -1.5  
 Maximum: 5.0 10.0 50.0

| Mass     | Calc. Mass | mDa | PPM | DBE  | i-FIT | Norm | Conf (%) | Formula       |
|----------|------------|-----|-----|------|-------|------|----------|---------------|
| 553.3392 | 553.3390   | 0.2 | 0.4 | 11.5 | 442.7 | n/a  | n/a      | C31 H45 N4 O5 |

Figure S88. HRMS spectrum of **15o**

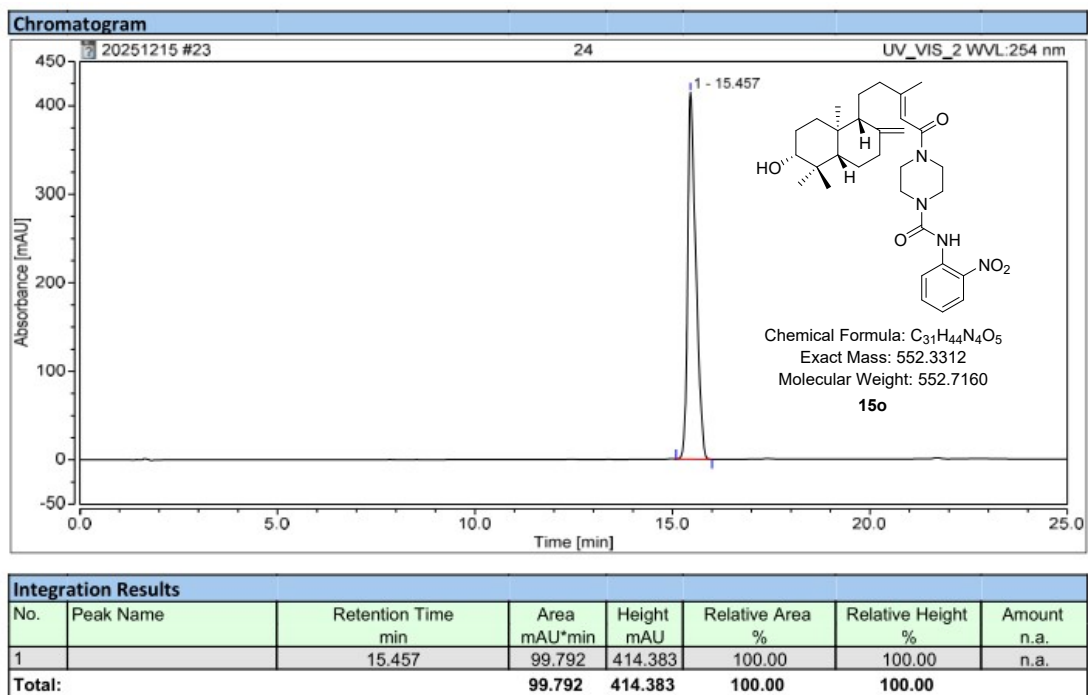

Figure S89. HPLC spectrum of 15o

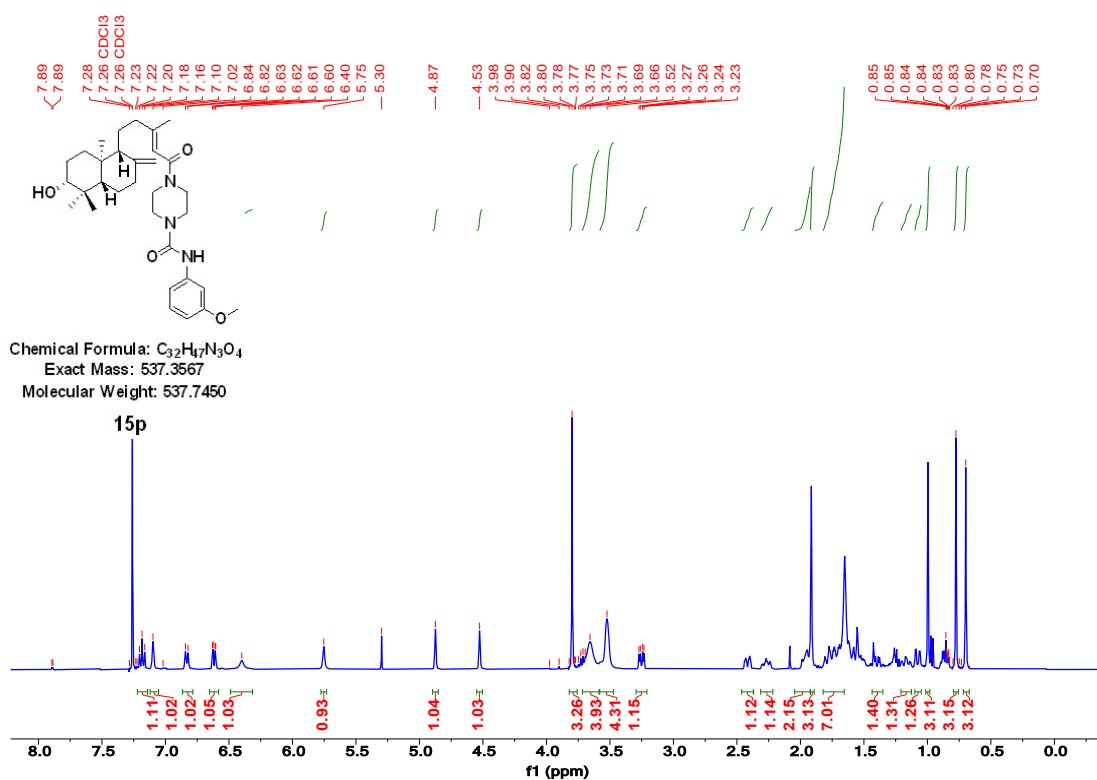

Figure S90.  $^1H$  NMR spectrum of 15p

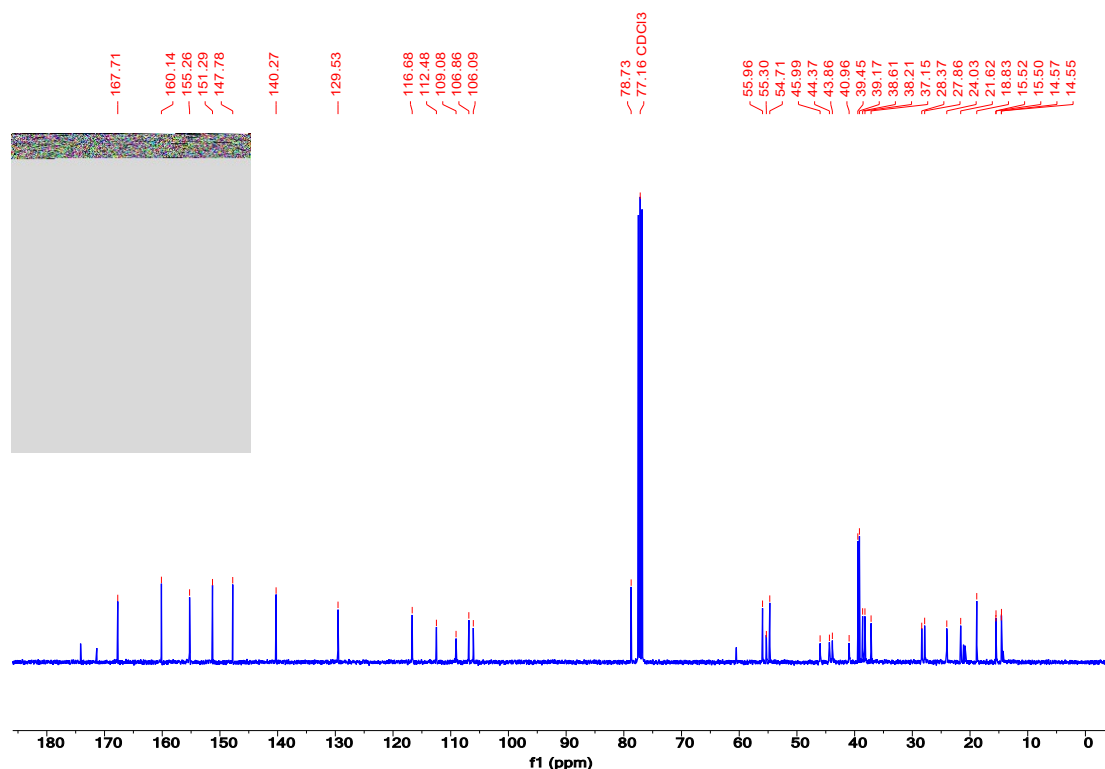

Figure S91. <sup>13</sup>C NMR spectrum of 15p

**Single Mass Analysis**

Tolerance = 5.0 mDa / DBE: min = -1.5, max = 50.0

Element prediction: Off

Number of isotope peaks used for i-FIT = 3

Monoisotopic Mass, Odd and Even Electron Ions

15 formula(e) evaluated with 1 results within limits (up to 50 best isotopic matches for each mass)

Elements Used:

C: 30-35 H: 44-51 N: 2-5 O: 2-5 K: 0-1

30

250310-2-Q-5 39 (0.099)

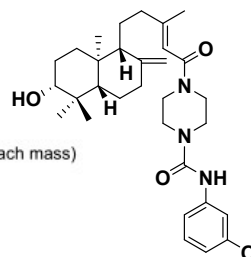

1: TOF MS ES+  
4.91e+004

**Chemical Formula: C<sub>32</sub>H<sub>47</sub>N<sub>3</sub>O<sub>4</sub>**

**Exact Mass: 537.3567**

**Molecular Weight: 537.7450**

**15p**

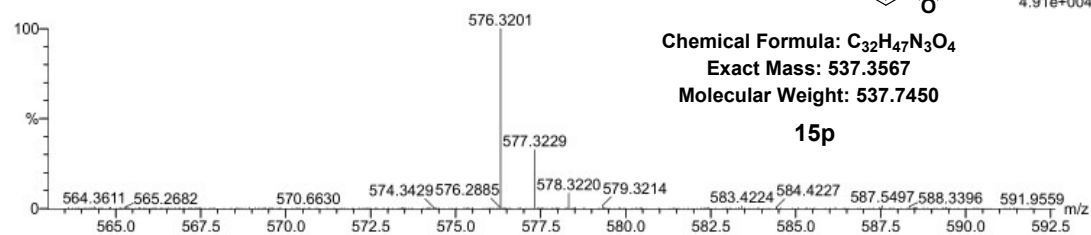

Minimum: -1.5  
Maximum: 5.0 10.0 50.0

| Mass     | Calc. Mass | mDa  | PPM  | DBE  | i-FIT | Norm | Conf (%) | Formula         |
|----------|------------|------|------|------|-------|------|----------|-----------------|
| 576.3201 | 576.3204   | -0.3 | -0.5 | 10.5 | 361.8 | n/a  | n/a      | C32 H47 N3 O4 K |

Figure S92. HRMS spectrum of 15p

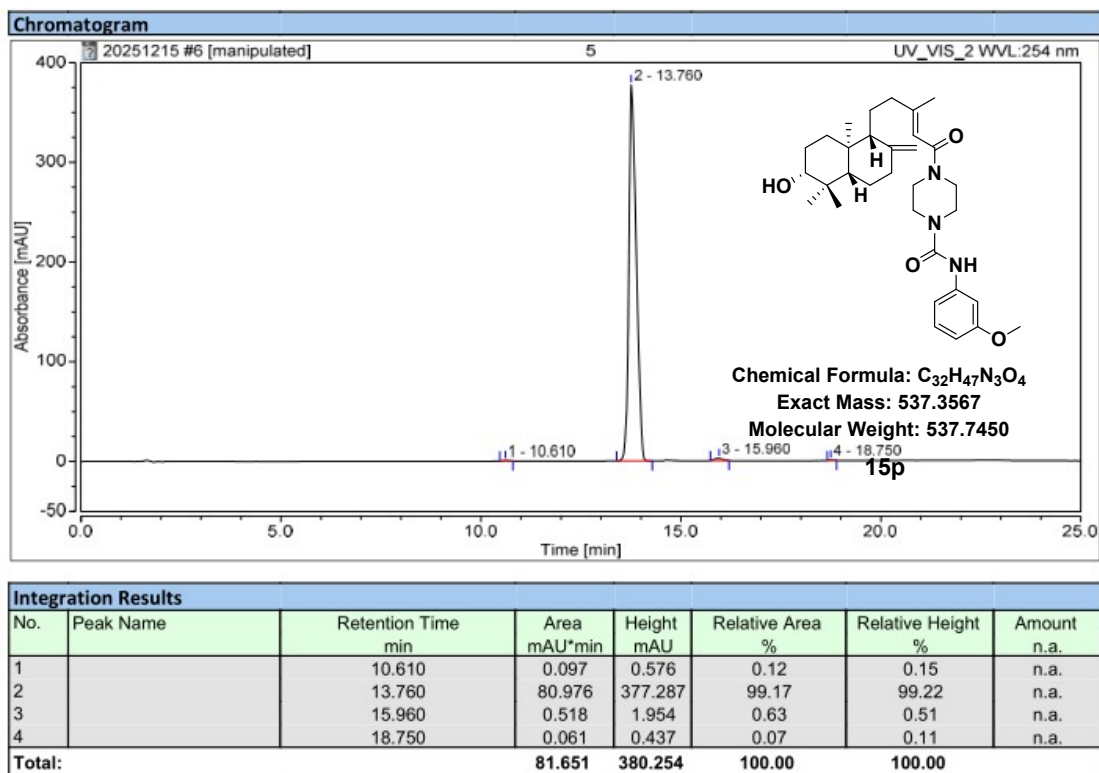

Figure S93. HPLC spectrum of 15p

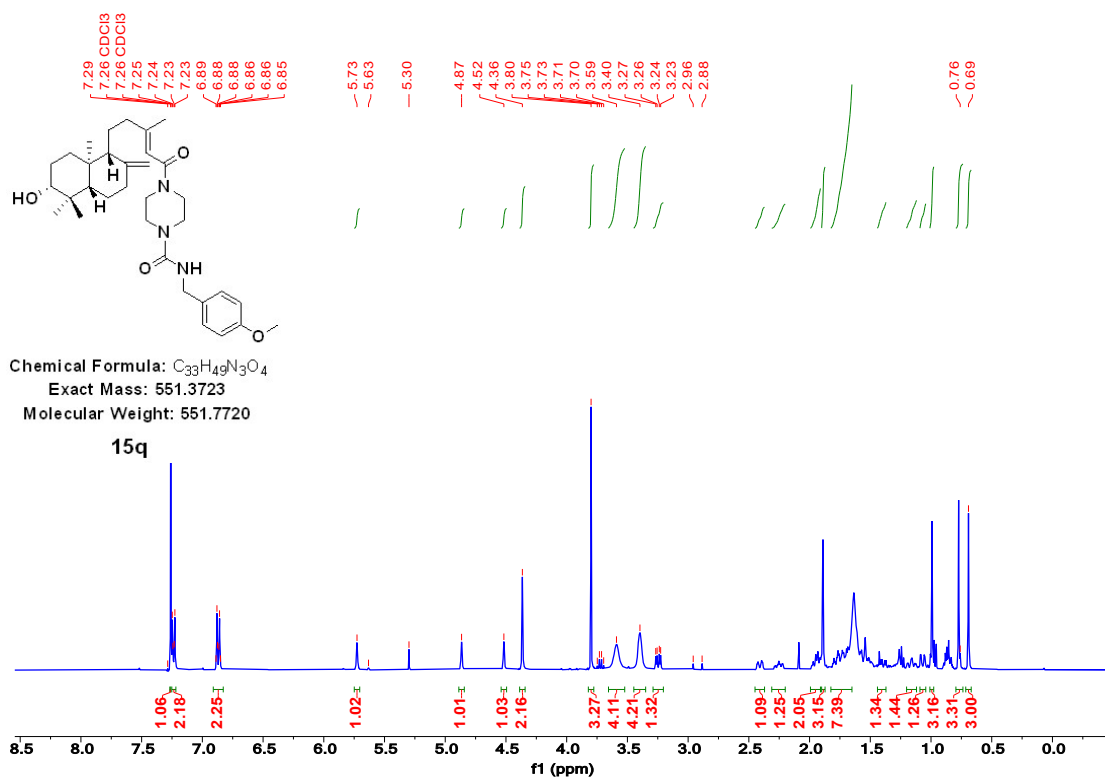

Figure S94.  $^1H$  NMR spectrum of 15q

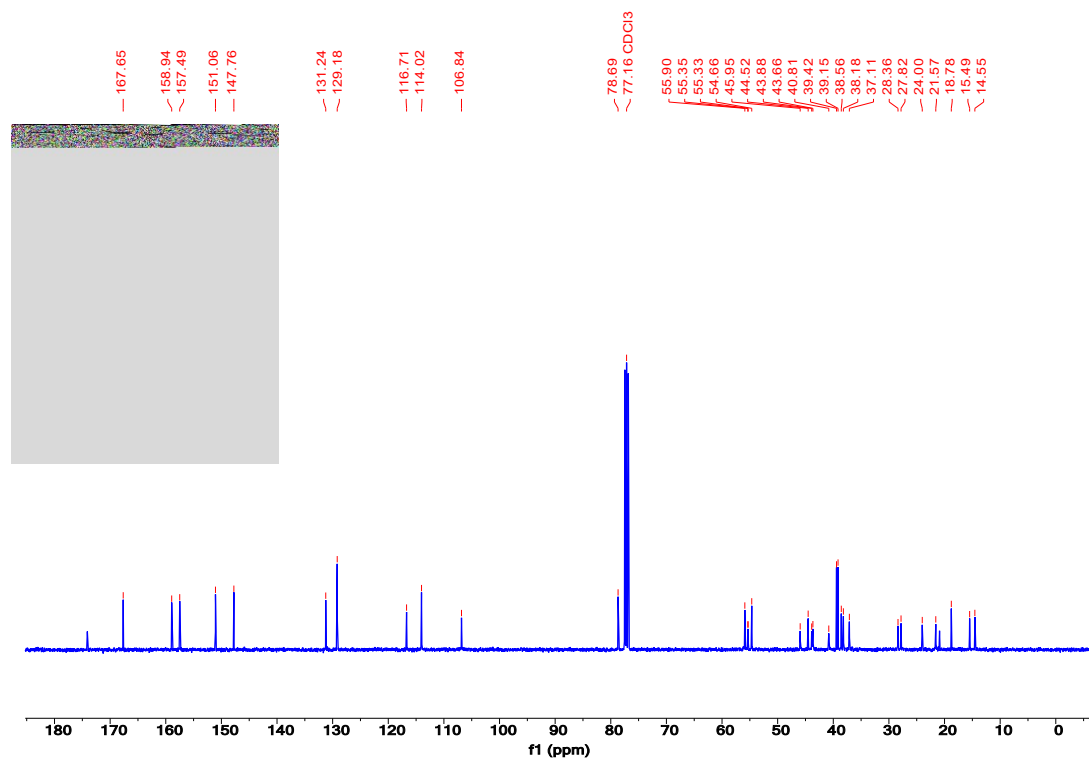

Figure S95.  $^{13}\text{C}$  NMR spectrum of 15q

**Single Mass Analysis**

Tolerance = 5.0 mDa / DBE: min = -1.5, max = 50.0

Element prediction: Off

Number of isotope peaks used for i-FIT = 3

Monoisotopic Mass, Even Electron Ions

60 formula(e) evaluated with 1 results within limits (up to 50 best isotopic matches for each mass)

Elements Used:

C: 29-56 H: 47-85 N: 2-6 O: 2-6

30

250310-2-Q-9 27 (0.076)

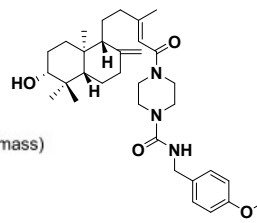

Chemical Formula:  $\text{C}_{33}\text{H}_{49}\text{N}_3\text{O}_4$

Exact Mass: 551.3723

Molecular Weight: 551.7720

15q

1: TOF MS ES+  
2.29e+005

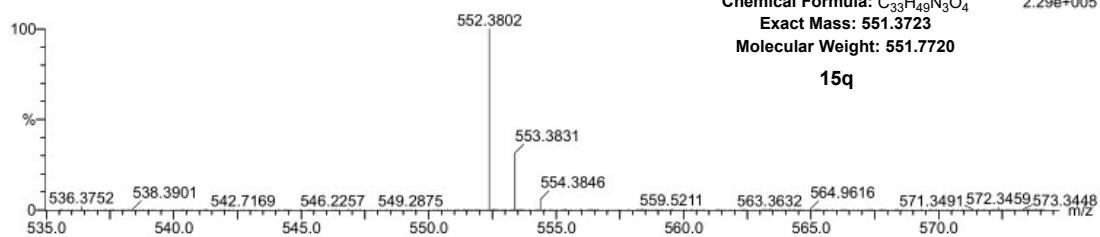

Minimum: -1.5  
Maximum: 5.0 10.0 50.0

| Mass     | Calc. Mass | mDa | PPM | DBE  | i-FIT | Norm | Conf(%) | Formula       |
|----------|------------|-----|-----|------|-------|------|---------|---------------|
| 552.3802 | 552.3801   | 0.1 | 0.2 | 10.5 | 450.3 | n/a  | n/a     | C33 H50 N3 O4 |

Figure S96. HRMS spectrum of 15q

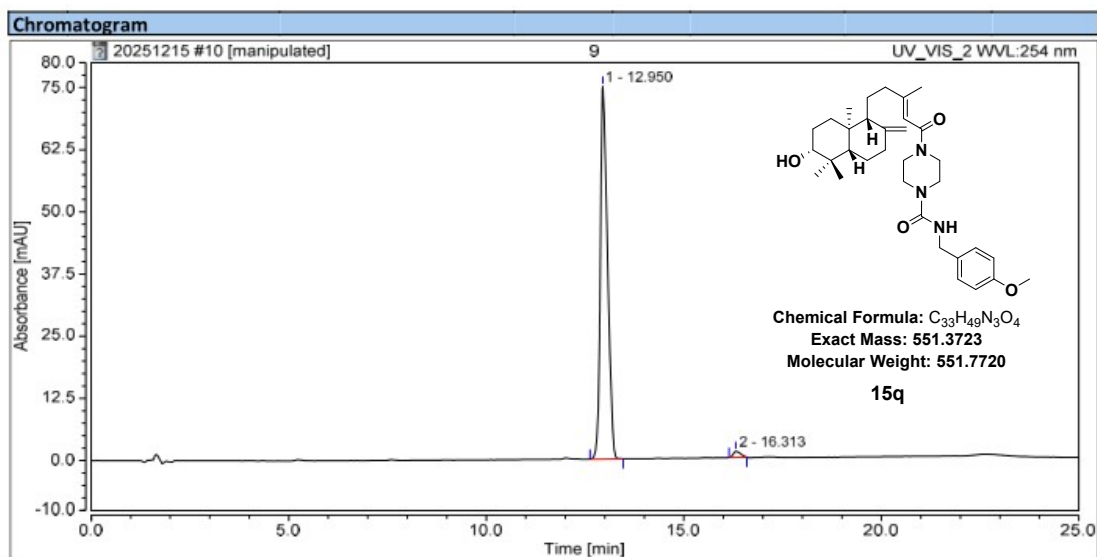

**Integration Results**

| No.           | Peak Name | Retention Time<br>min | Area<br>mAU*min | Height<br>mAU | Relative Area<br>% | Relative Height<br>% | Amount |
|---------------|-----------|-----------------------|-----------------|---------------|--------------------|----------------------|--------|
| 1             |           | 12.950                | 15.670          | 74.964        | 98.33              | 98.39                | n.a.   |
| 2             |           | 16.313                | 0.266           | 1.230         | 1.67               | 1.61                 | n.a.   |
| <b>Total:</b> |           |                       | <b>15.936</b>   | <b>76.193</b> | <b>100.00</b>      | <b>100.00</b>        |        |

Figure S97. HPLC spectrum of 15q

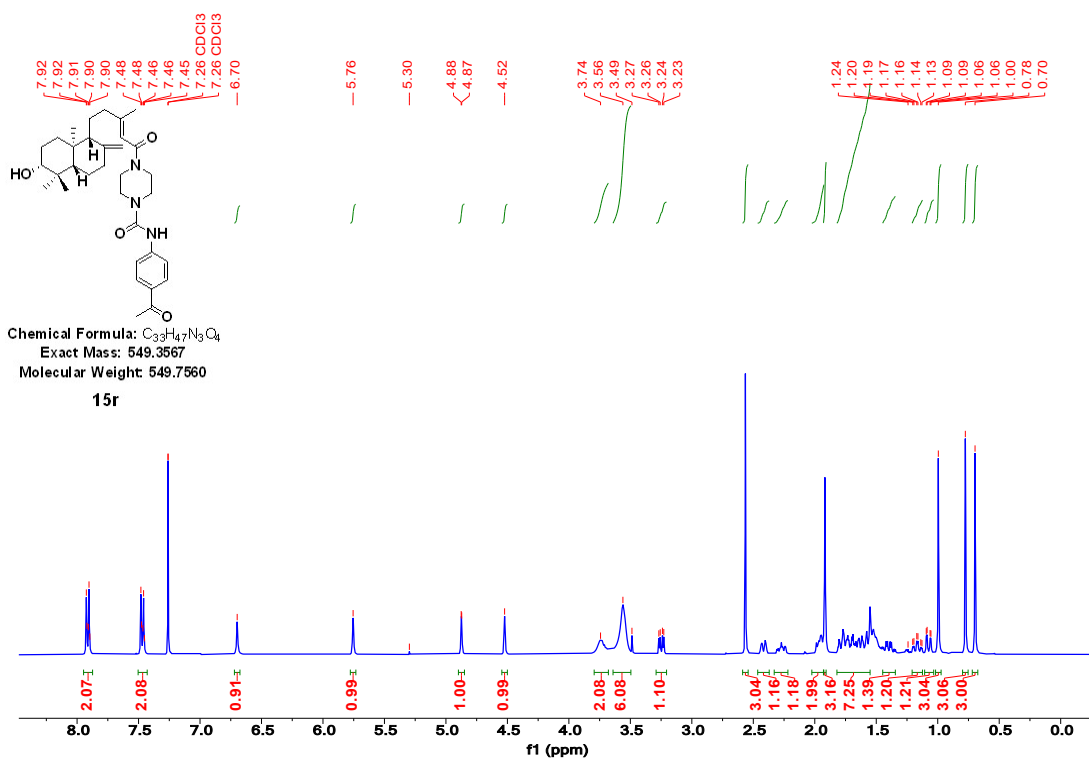

Figure S98.  $^1H$  NMR spectrum of 15r

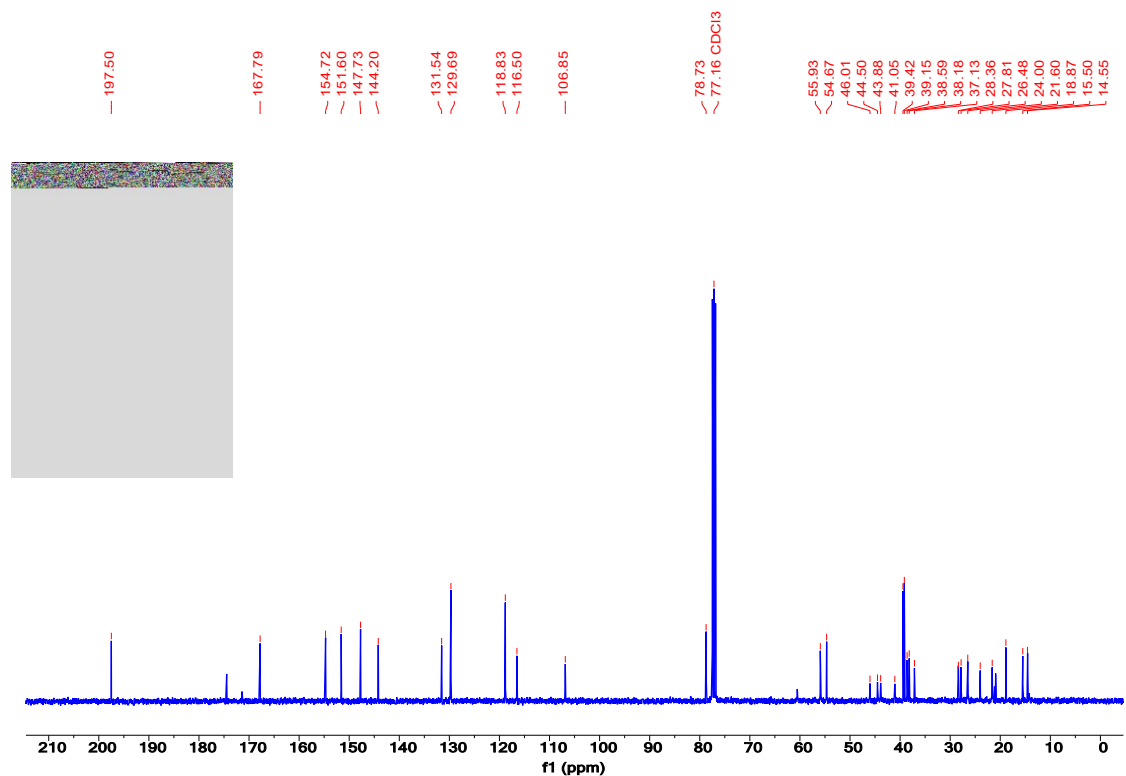

Figure S99.  $^{13}\text{C}$  NMR spectrum of 15r

#### Single Mass Analysis

Tolerance = 5.0 mDa / DBE: min = -1.5, max = 50.0

Element prediction: Off

Number of isotope peaks used for i-FIT = 3

Monoisotopic Mass, Even Electron Ions

7 formula(e) evaluated with 1 results within limits (up to 50 best isotopic matches for each mass)

Elements Used:

C: 31-33 H: 44-51 N: 2-5 O: 2-5 Na: 0-1

7

250310-2-Q-12 18 (0.059)

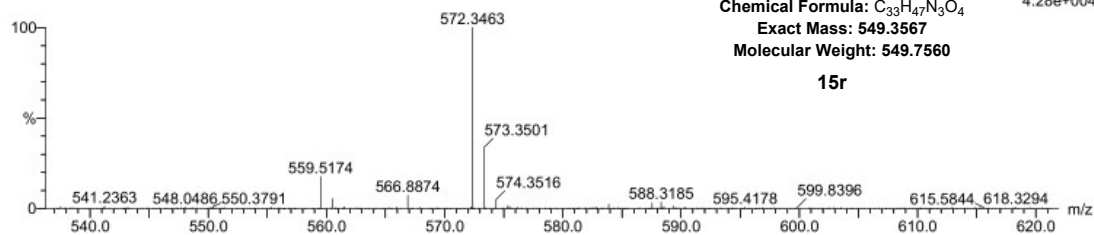

Minimum: -1.5  
Maximum: 50.0

| Mass     | Calc. Mass | mDa  | PPM  | DBE  | i-FIT | Norm | Conf(%) | Formula                                                          |
|----------|------------|------|------|------|-------|------|---------|------------------------------------------------------------------|
| 572.3463 | 572.3464   | -0.1 | -0.2 | 11.5 | 143.3 | n/a  | n/a     | C <sub>33</sub> H <sub>47</sub> N <sub>3</sub> O <sub>4</sub> Na |

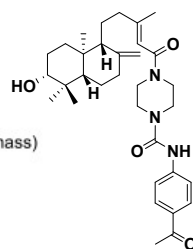

Chemical Formula: C<sub>33</sub>H<sub>47</sub>N<sub>3</sub>O<sub>4</sub>

Exact Mass: 549.3567

Molecular Weight: 549.7560

15r

1: TOF MS ES+  
4.28e+004

Figure S100. HRMS spectrum of 15r

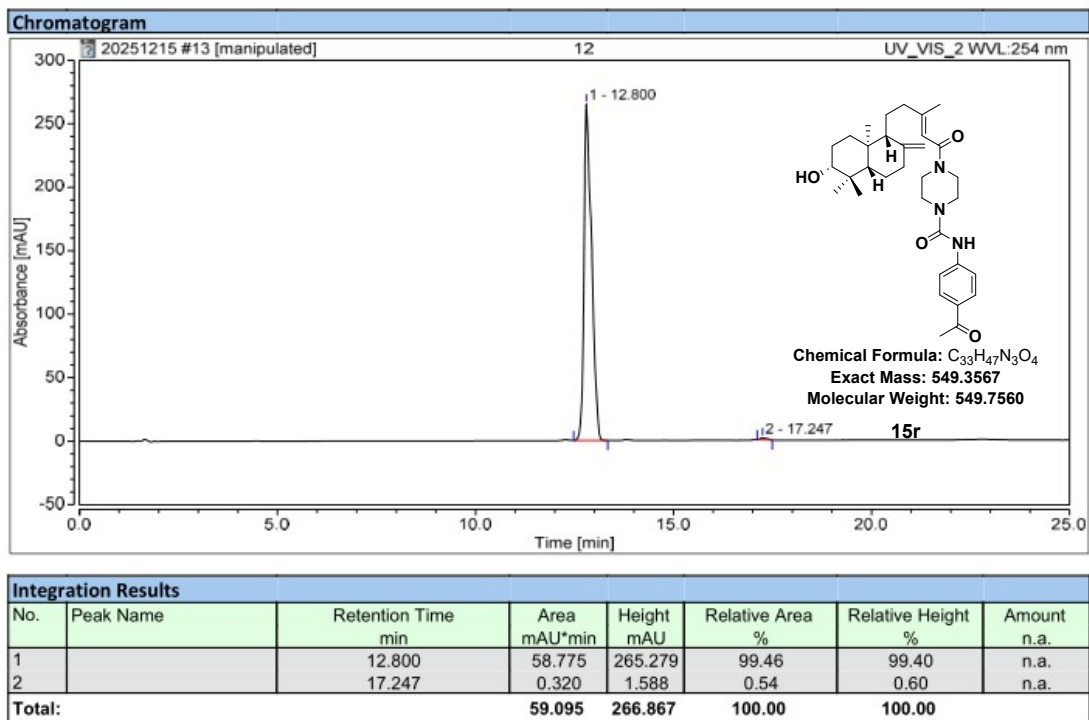

Figure S101. HPLC spectrum of 15r

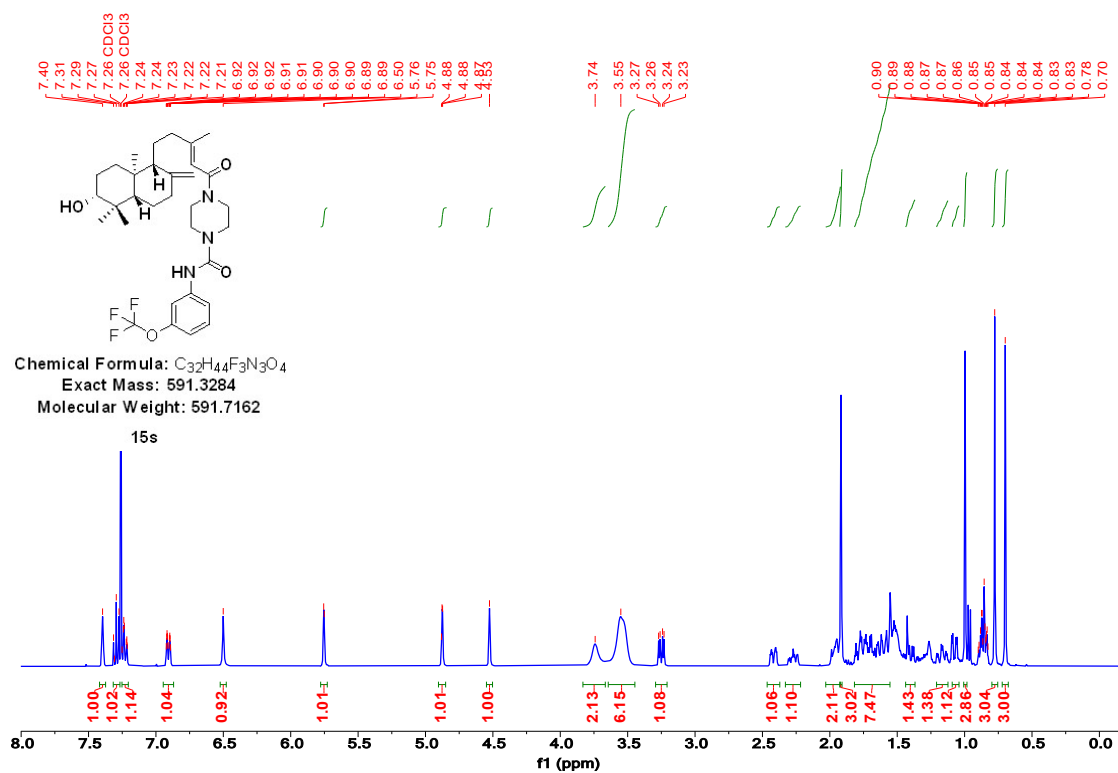

Figure S102. <sup>1</sup>H NMR spectrum of 15s

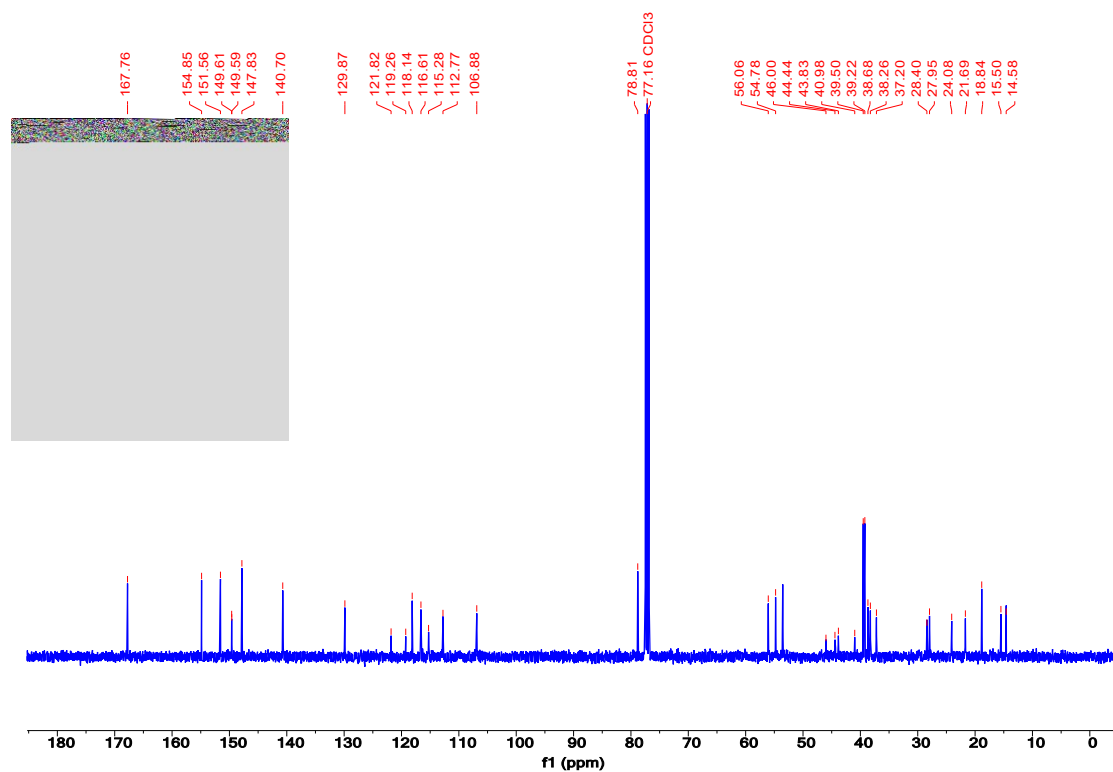

Figure S103.  $^{13}\text{C}$  NMR spectrum of 15s

**Single Mass Analysis**

Tolerance = 5.0 mDa / DBE: min = -1.5, max = 50.0

Element prediction: Off

Number of isotope peaks used for i-FIT = 3

Monoisotopic Mass, Even Electron Ions

38 formula(e) evaluated with 1 results within limits (up to 50 best isotopic matches for each mass)

Elements Used:

C: 27-33 H: 44-51 N: 2-5 O: 2-5 F: 0-3 Na: 0-1

7

250310-2-Q-16 47 (0.115)

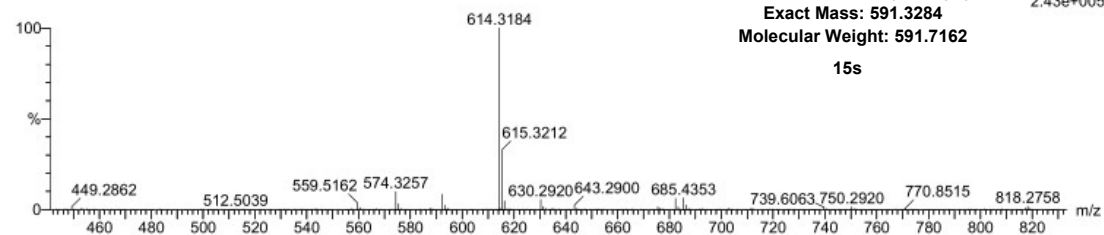

Minimum: -1.5  
Maximum: 5.0 10.0 50.0

| Mass     | Calc. Mass | mDa | PPM | DBE  | i-FIT | Norm | Conf (%) | Formula             |
|----------|------------|-----|-----|------|-------|------|----------|---------------------|
| 614.3184 | 614.3182   | 0.2 | 0.3 | 10.5 | 425.6 | n/a  | n/a      | C32 H44 N3 O4 F3 Na |

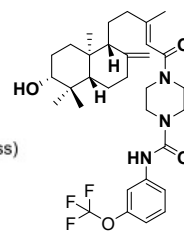

Chemical Formula:  $\text{C}_{32}\text{H}_{44}\text{F}_3\text{N}_3\text{O}_4$  <sup>1</sup>: TOF MS ES+  
Exact Mass: 591.3284 2.43e+005  
Molecular Weight: 591.7162  
15s

Figure S104. HRMS spectrum of 15s

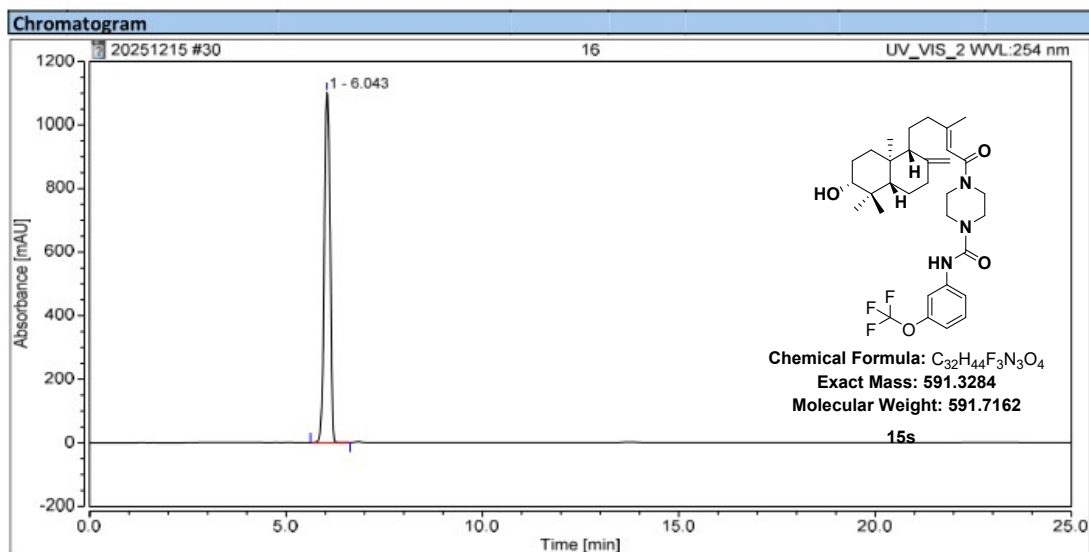

**Integration Results**

| No.           | Peak Name | Retention Time<br>min | Area<br>mAU*min | Height<br>mAU | Relative Area<br>% | Relative Height<br>% | Amount<br>n.a. |
|---------------|-----------|-----------------------|-----------------|---------------|--------------------|----------------------|----------------|
| 1             |           | 6.043                 | 189.064         | 1102.248      | 100.00             | 100.00               | n.a.           |
| <b>Total:</b> |           |                       | 189.064         | #####         | 100.00             | 100.00               |                |

Figure S105. HPLC spectrum of 15s

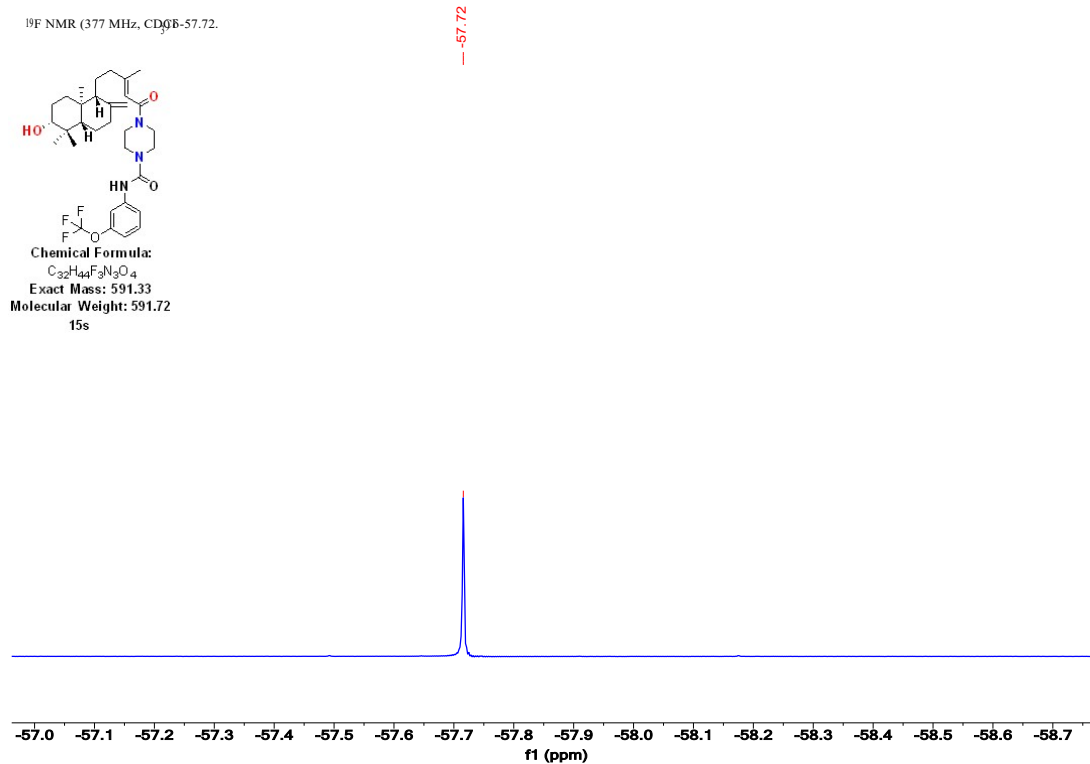

Figure S106.  $^{19}F$  NMR spectrum of 15s



### Single Mass Analysis

Tolerance = 5.0 mDa / DBE: min = -1.5, max = 50.0

Element prediction: Off

Number of isotope peaks used for i-FIT = 3

Monoisotopic Mass, Even Electron Ions

54 formula(e) evaluated with 1 results within limits (up to 50 best isotopic matches for each mass)

Elements Used:

C: 32-56 H: 44-85 N: 2-6 O: 2-6

7

250310-2-Q-32 29 (0.080)

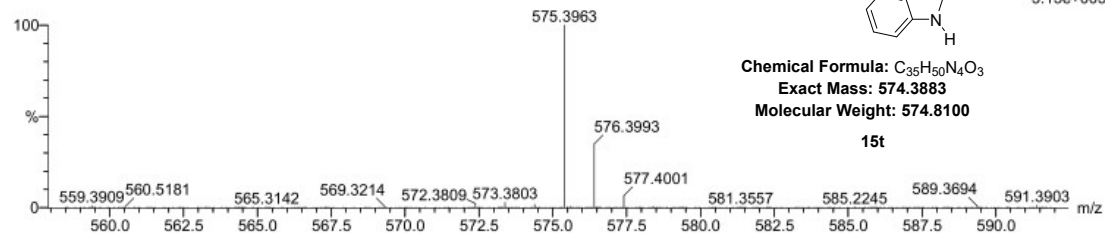

Minimum: -1.5  
Maximum: 50.0

| Mass     | Calc. Mass | mDa | PPM | DBE  | i-FIT | Norm | Conf (%) | Formula                                                       |
|----------|------------|-----|-----|------|-------|------|----------|---------------------------------------------------------------|
| 575.3963 | 575.3961   | 0.2 | 0.3 | 12.5 | 461.6 | n/a  | n/a      | C <sub>35</sub> H <sub>51</sub> N <sub>4</sub> O <sub>3</sub> |

Figure S109. HRMS spectrum of 15t

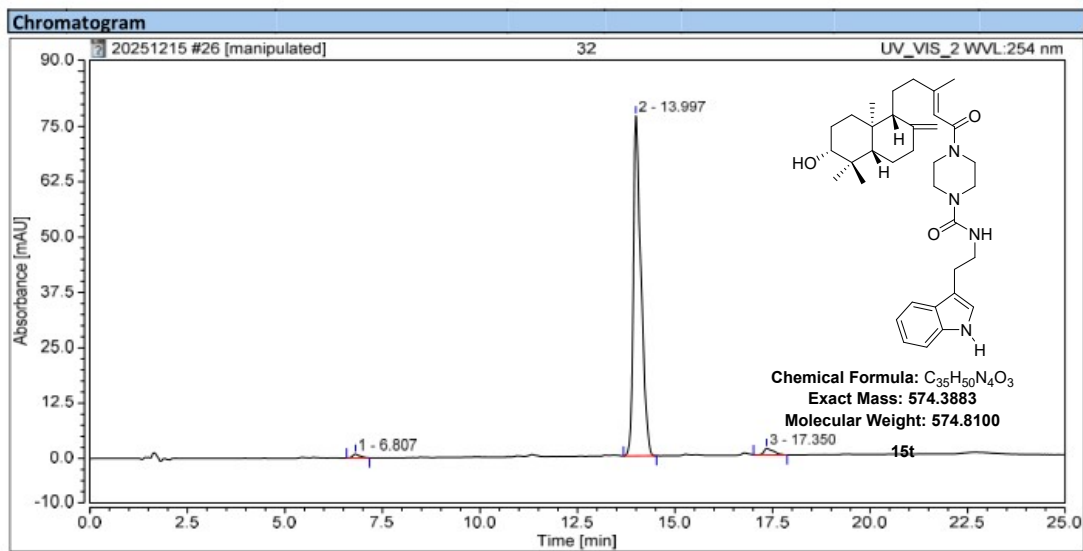

| No.    | Peak Name | Retention Time<br>min | Area<br>mAU*min | Height<br>mAU | Relative Area<br>% | Relative Height<br>% | Amount<br>n.a. |
|--------|-----------|-----------------------|-----------------|---------------|--------------------|----------------------|----------------|
| 1      |           | 6.807                 | 0.183           | 0.846         | 1.02               | 1.07                 | n.a.           |
| 2      |           | 13.997                | 17.451          | 76.864        | 96.75              | 97.12                | n.a.           |
| 3      |           | 17.350                | 0.403           | 1.430         | 2.24               | 1.81                 | n.a.           |
| Total: |           |                       | 18.038          | 79.140        | 100.00             | 100.00               |                |

Figure S110. HPLC spectrum of 15t

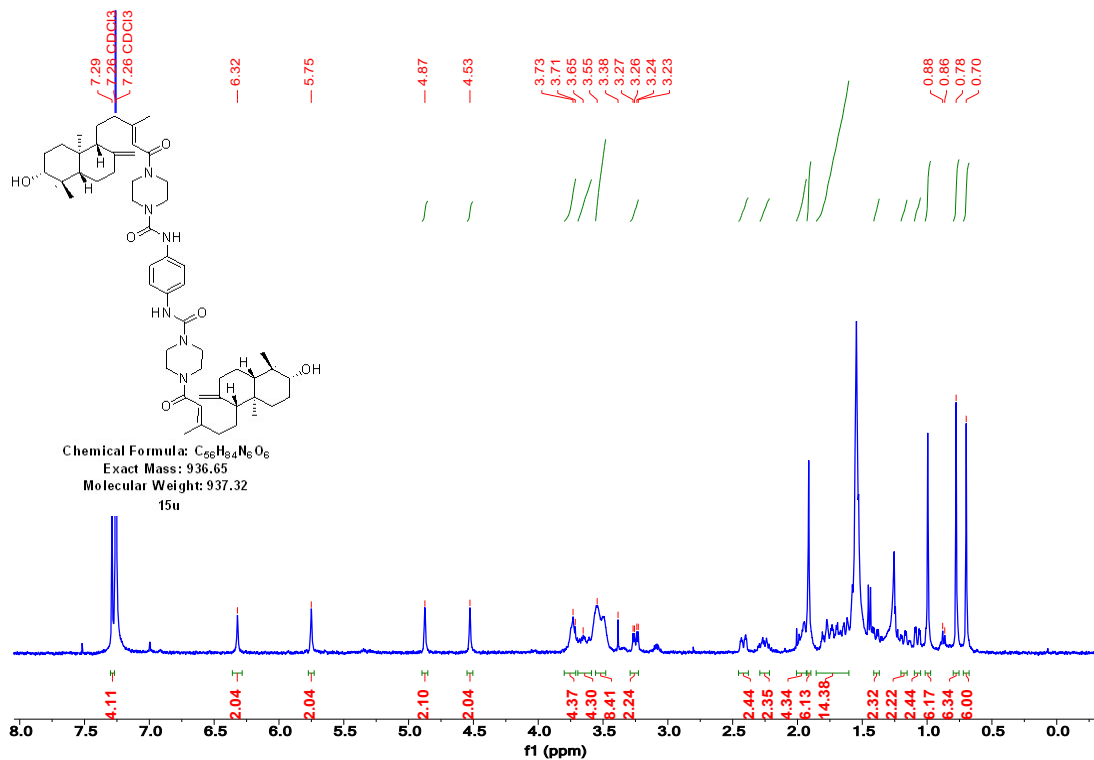

Figure S111.  $^1H$  NMR spectrum of 15u

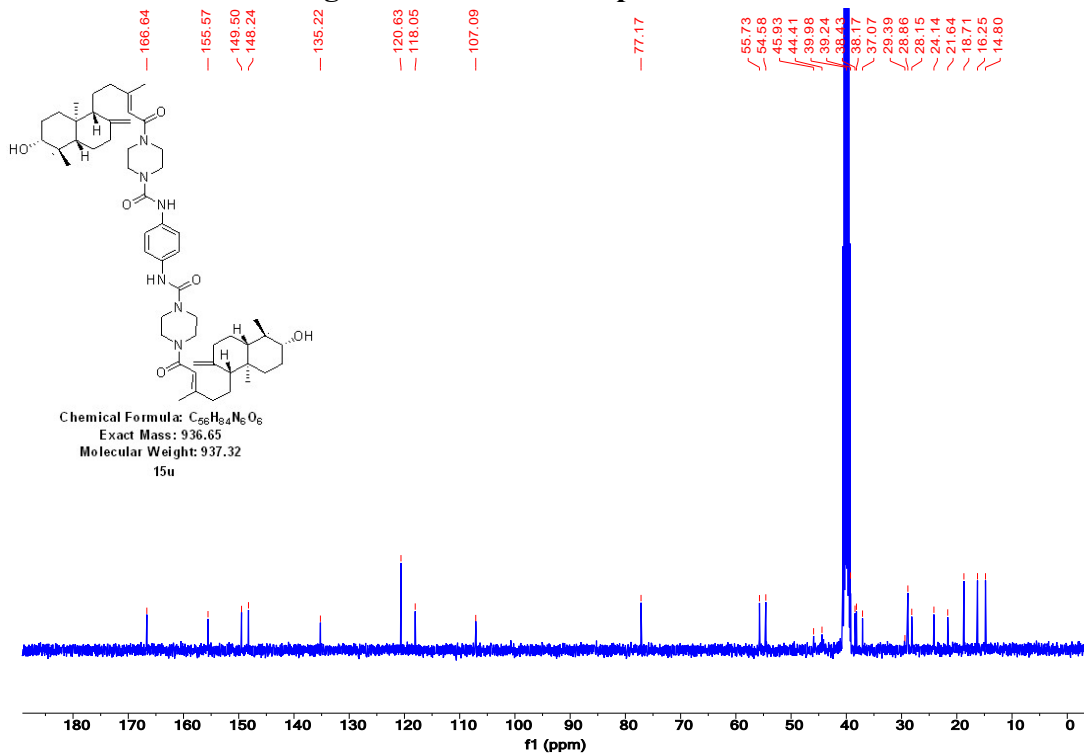

Figure S112.  $^{13}C$  NMR spectrum of 15u

### Single Mass Analysis

Tolerance = 5.0 mDa / DBE: min = -1.5, max = 50.0

Element prediction: Off

Number of isotope peaks used for i-FIT = 3

Monoisotopic Mass, Even Electron Ions

7 formula(e) evaluated with 1 results within limits (up to 50 best isotopic matches for each mass)

Elements Used:

C: 32-56 H: 44-85 N: 2-6 O: 2-6

7

250310-2-Q-29 31 (0.084)

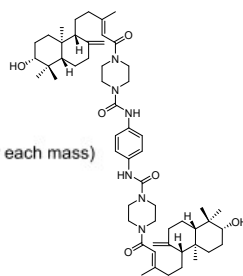

Chemical Formula:  $C_{26}H_{32}N_2O_6$   
Exact Mass: 936.6452  
Molecular Weight: 937.3240  
15u

1: TOF MS ES+  
1.87e+005

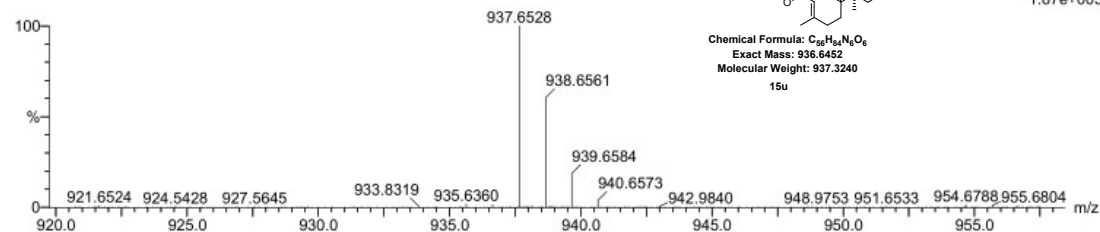

Minimum: -1.5  
Maximum: 5.0 10.0 50.0

| Mass     | Calc. Mass | mDa  | PPM  | DBE  | i-FIT | Norm | Conf (%) | Formula       |
|----------|------------|------|------|------|-------|------|----------|---------------|
| 937.6528 | 937.6531   | -0.3 | -0.3 | 17.5 | 416.3 | n/a  | n/a      | C56 H85 N6 O6 |

Figure S113. HRMS spectrum of 15u

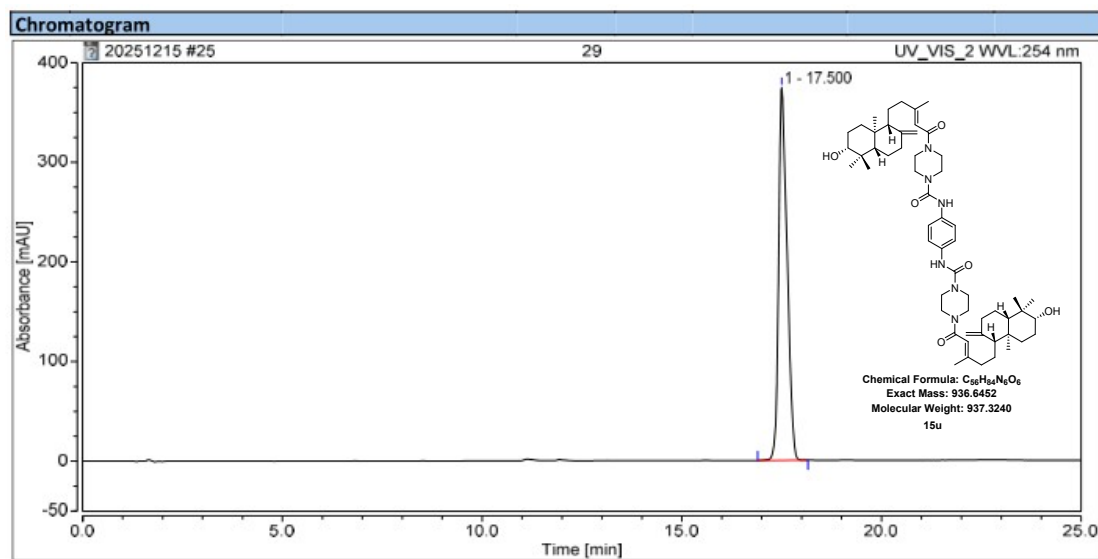

| Integration Results |           |                    |               |                |                 |                   |             |
|---------------------|-----------|--------------------|---------------|----------------|-----------------|-------------------|-------------|
| No.                 | Peak Name | Retention Time min | Area mAU*min  | Height mAU     | Relative Area % | Relative Height % | Amount n.a. |
| 1                   |           | 17.500             | 91.730        | 374.563        | 100.00          | 100.00            | n.a.        |
| <b>Total:</b>       |           |                    | <b>91.730</b> | <b>374.563</b> | <b>100.00</b>   | <b>100.00</b>     |             |

Figure S114. HPLC spectrum of 15u

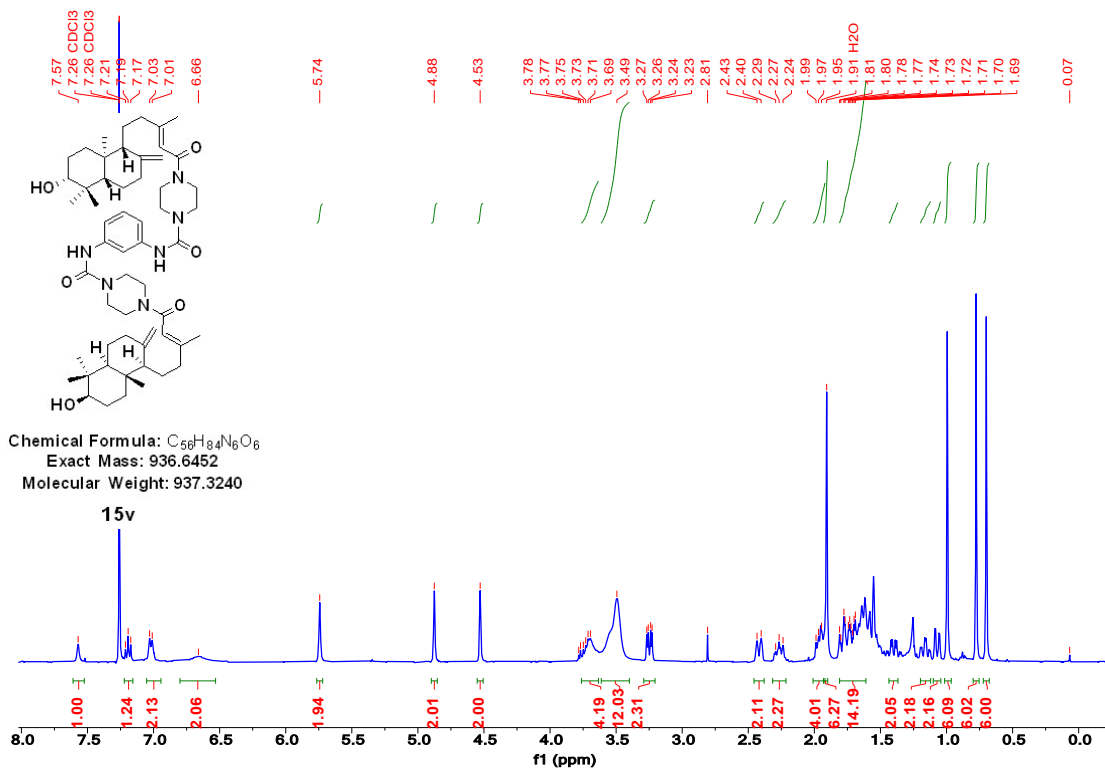

Figure S115.  $^1\text{H}$  NMR spectrum of 15v

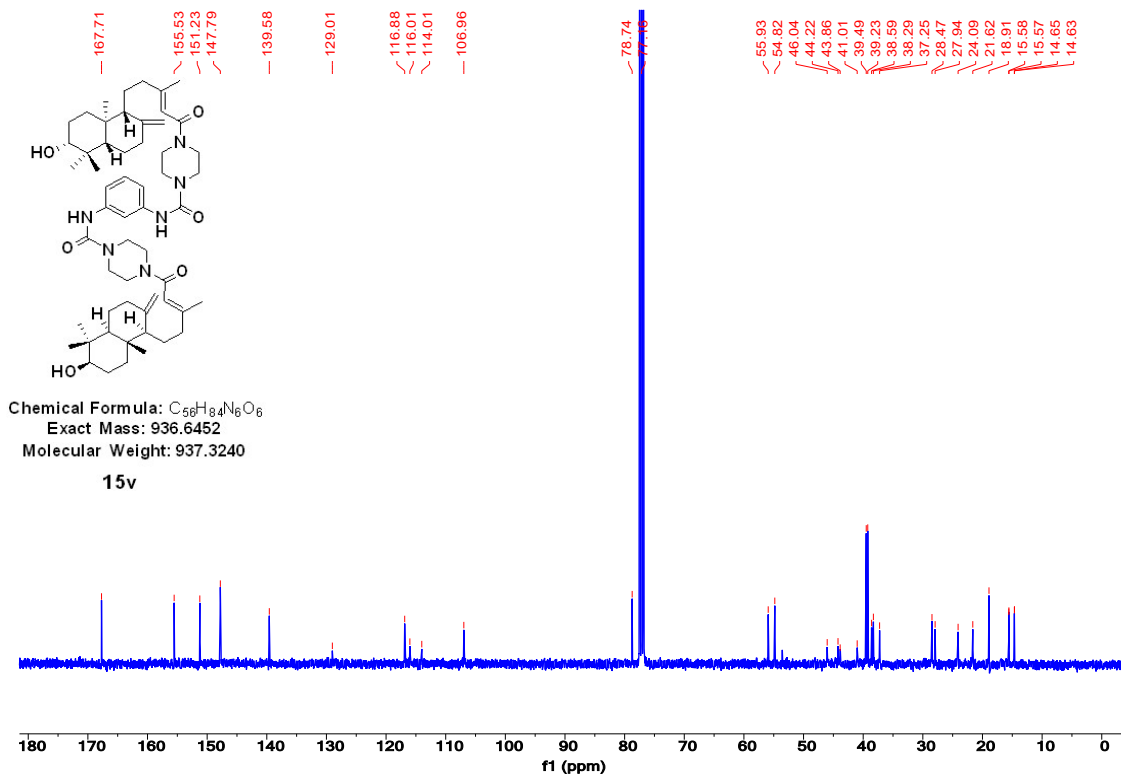

Figure S116.  $^{13}\text{C}$  NMR spectrum of 15v

### Single Mass Analysis

Tolerance = 5.0 mDa / DBE: min = -1.5, max = 50.0

Element prediction: Off

Number of isotope peaks used for i-FIT = 3

Monoisotopic Mass, Even Electron Ions

7 formula(e) evaluated with 1 results within limits (up to 50 best isotopic matches for each mass)

Elements Used:

C: 29-56 H: 47-85 N: 2-6 O: 2-6

7

250310-2-Q-18 36 (0.094)

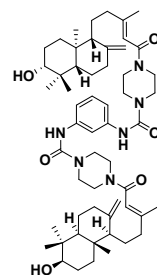

1: TOF MS ES+  
3.21e+005

Chemical Formula: C<sub>56</sub>H<sub>84</sub>N<sub>6</sub>O<sub>6</sub>

Exact Mass: 936.6452

Molecular Weight: 937.3240

15v

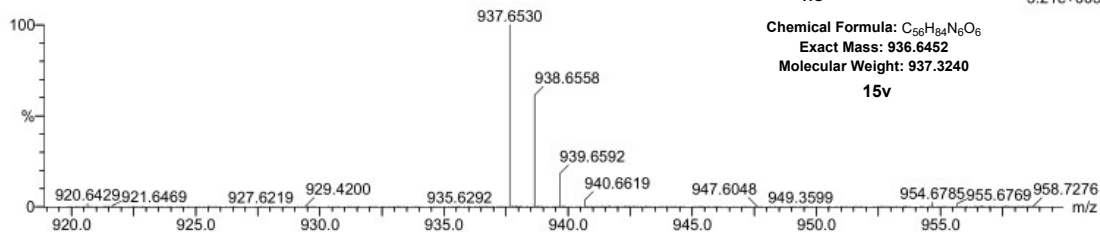

Minimum: -1.5  
Maximum: 5.0 10.0 50.0

| Mass     | Calc. Mass | mDa  | PPM  | DBE  | i-FIT | Norm | Conf (%) | Formula                                                       |
|----------|------------|------|------|------|-------|------|----------|---------------------------------------------------------------|
| 937.6530 | 937.6531   | -0.1 | -0.1 | 17.5 | 405.7 | n/a  | n/a      | C <sub>56</sub> H <sub>85</sub> N <sub>6</sub> O <sub>6</sub> |

Figure S117. HRMS spectrum of 15v

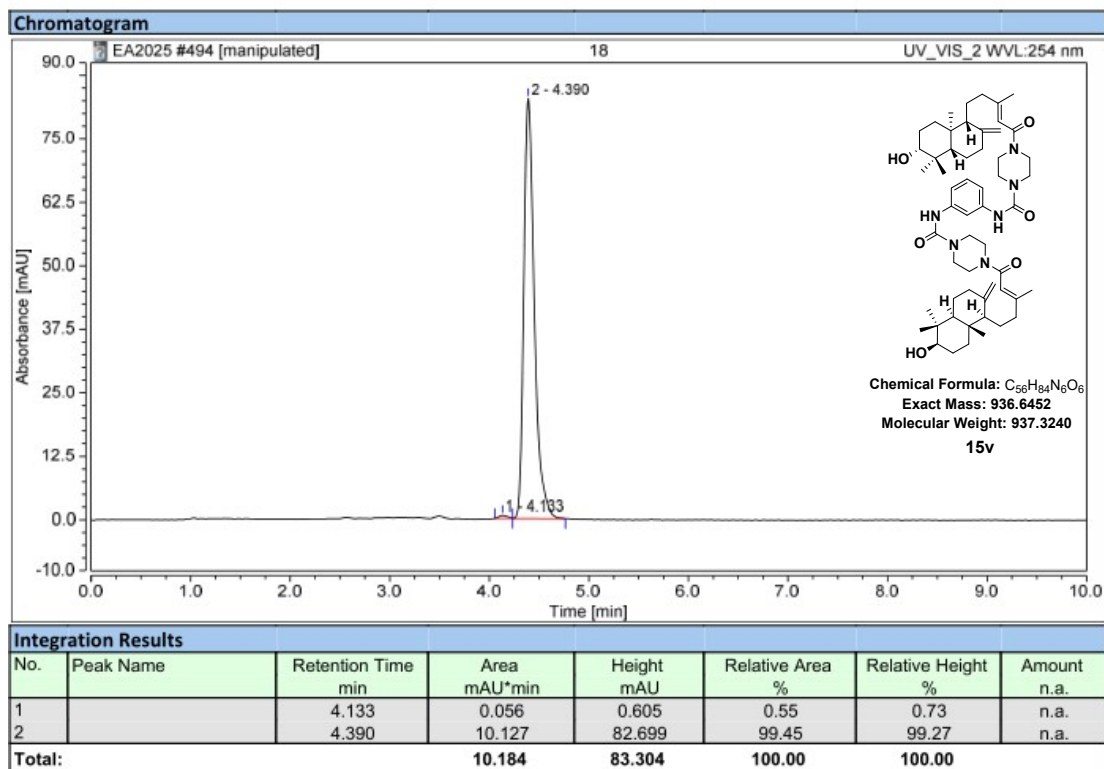

Figure S118. HPLC spectrum of 15v

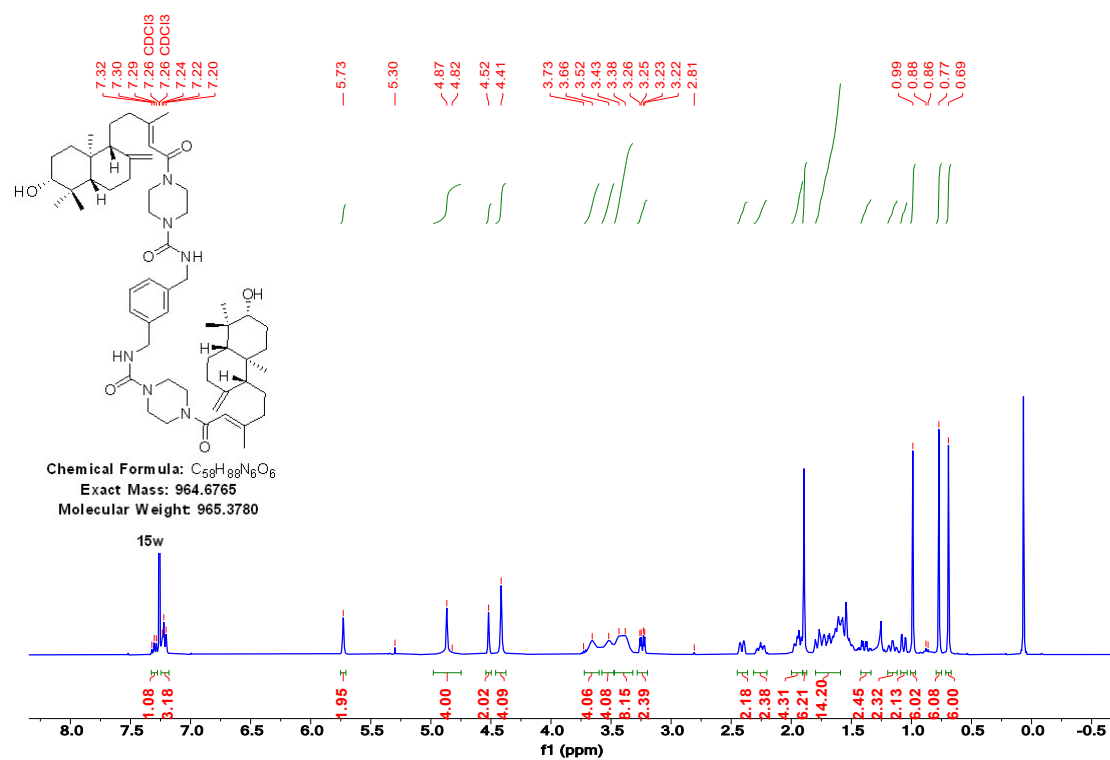

Figure S119. <sup>1</sup>H NMR spectrum of 15w

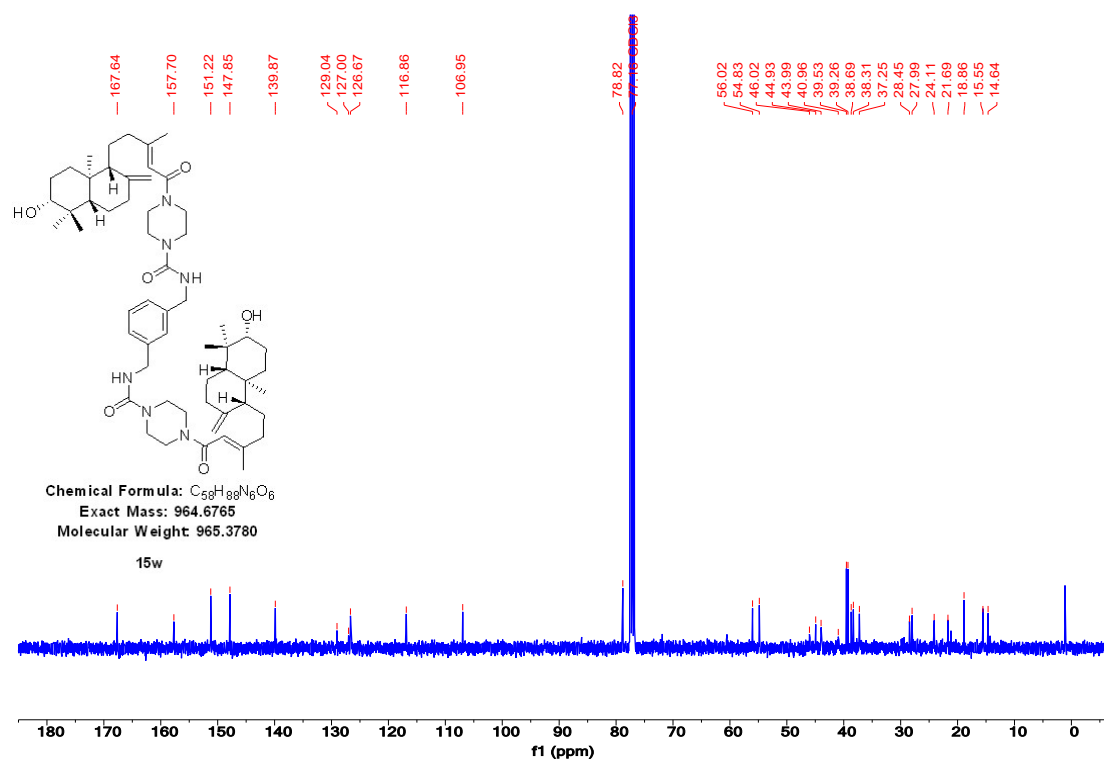

Figure S120. <sup>13</sup>C NMR spectrum of 15w

### Single Mass Analysis

Tolerance = 5.0 mDa / DBE: min = -1.5, max = 50.0

Element prediction: Off

Number of isotope peaks used for i-FIT = 3

Monoisotopic Mass, Even Electron Ions

7 formula(e) evaluated with 1 results within limits (up to 50 best isotopic matches for each mass)

Elements Used:

C: 29-58 H: 44-89 N: 2-6 O: 2-6

7

250310-2-Q-23 29 (0.080)

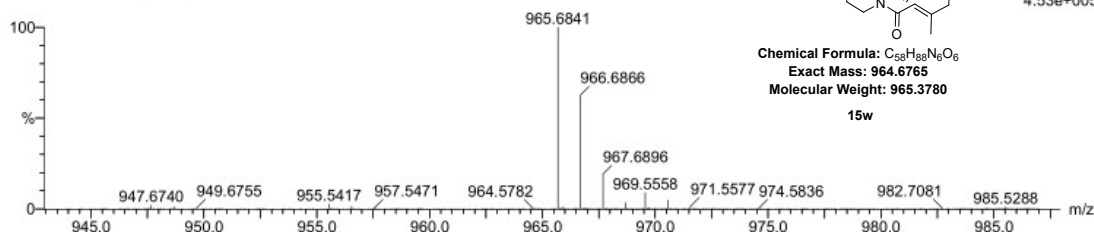

Minimum: -1.5  
Maximum: 50.0

| Mass     | Calc. Mass | mDa  | PPM  | DBE  | i-FIT | Norm | Conf(%) | Formula       |
|----------|------------|------|------|------|-------|------|---------|---------------|
| 965.6841 | 965.6844   | -0.3 | -0.3 | 17.5 | 477.1 | n/a  | n/a     | C58 H89 N6 O6 |

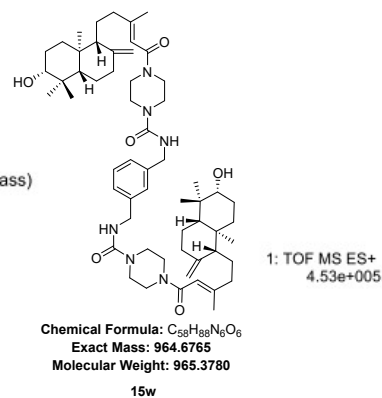

Figure S121. HRMS spectrum of 15w

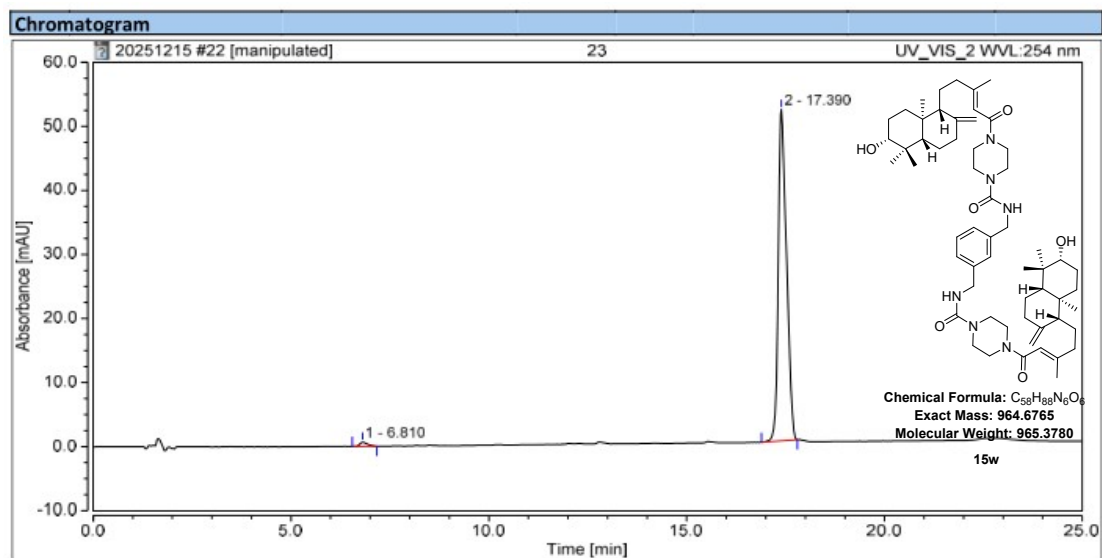

| Integration Results |           |                    |               |               |                 |                   |        |
|---------------------|-----------|--------------------|---------------|---------------|-----------------|-------------------|--------|
| No.                 | Peak Name | Retention Time min | Area mAU*min  | Height mAU    | Relative Area % | Relative Height % | Amount |
| 1                   |           | 6.810              | 0.144         | 0.658         | 1.15            | 1.25              | n.a.   |
| 2                   |           | 17.390             | 12.384        | 51.772        | 98.85           | 98.75             | n.a.   |
| <b>Total:</b>       |           |                    | <b>12.528</b> | <b>52.429</b> | <b>100.00</b>   | <b>100.00</b>     |        |

Figure S122. HPLC spectrum of 15w

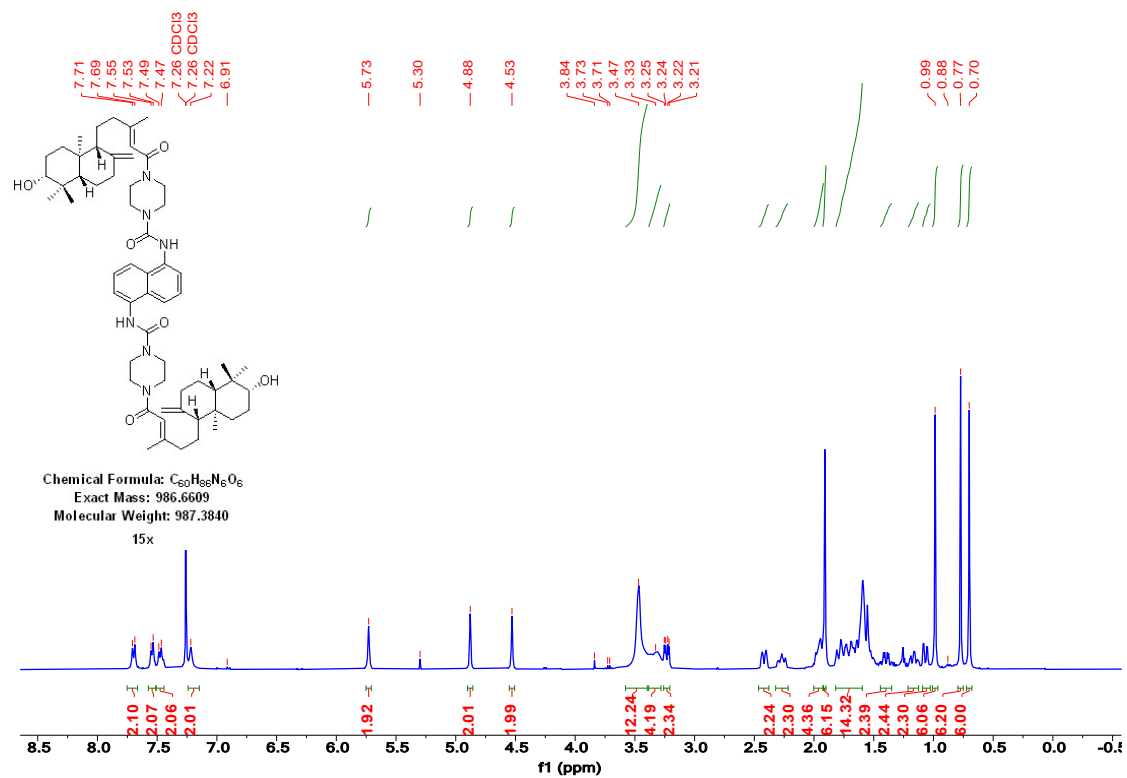

Figure S123.  $^1H$  NMR spectrum of 15x

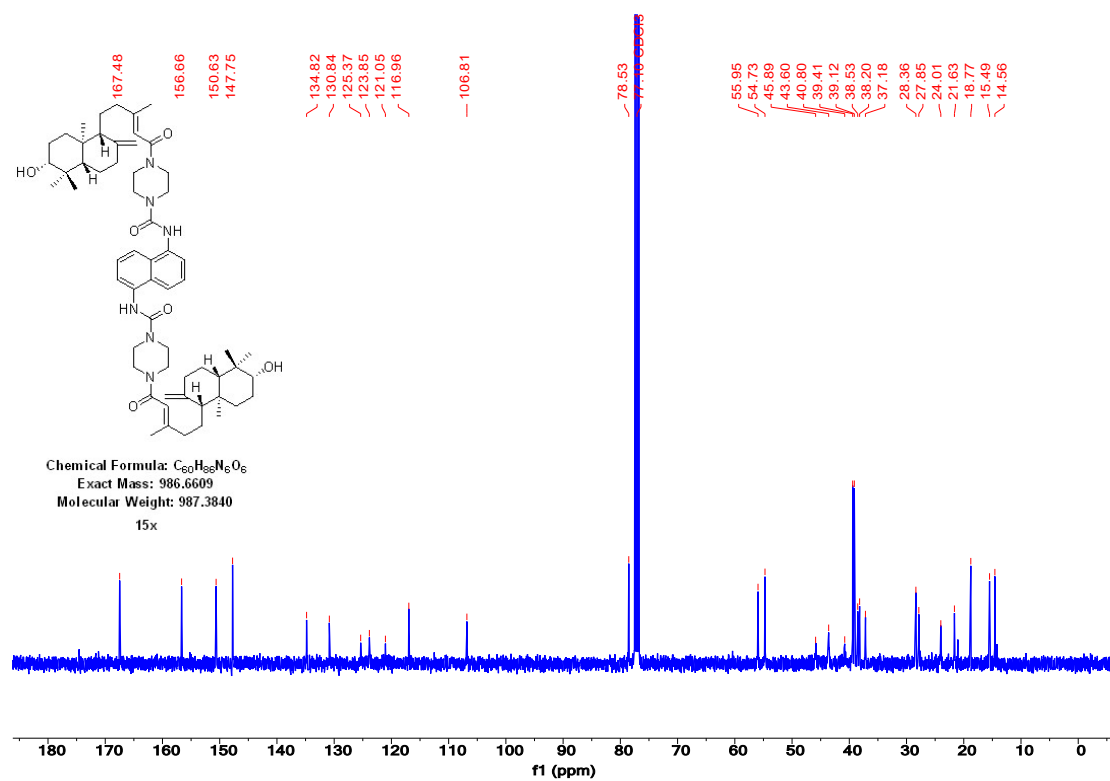

Figure S124.  $^{13}C$  NMR spectrum of 15x

### Single Mass Analysis

Tolerance = 5.0 PPM / DBE: min = -1.5, max = 50.0

Element prediction: Off

Number of isotope peaks used for i-FIT = 3

Monoisotopic Mass, Even Electron Ions

808 formula(e) evaluated with 1 results within limits (all results (up to 1000) for each mass)

Elements Used:

C: 60-60 H: 16-90 N: 1-6 O: 1-20 Na: 1-8

7

250310-2-Q-37 89 (0.203)

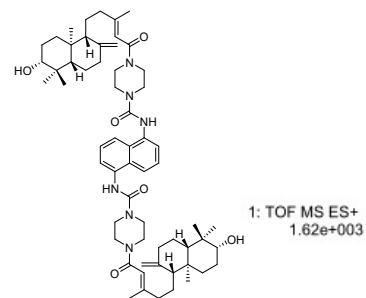

Chemical Formula: C<sub>60</sub>H<sub>86</sub>N<sub>6</sub>O<sub>6</sub>  
Exact Mass: 986.6609  
Molecular Weight: 987.3840

15x

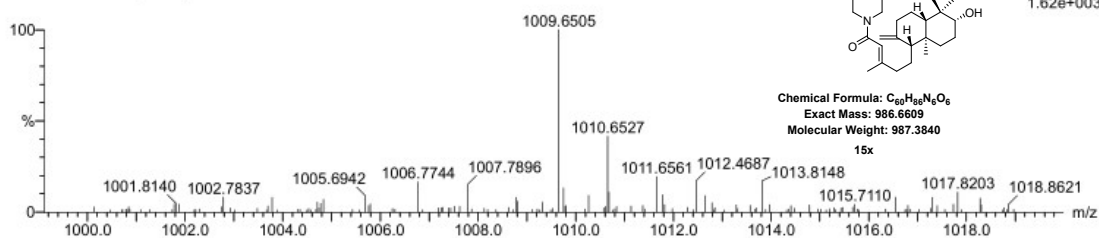

Minimum: -1.5  
Maximum: 50.0

| Mass      | Calc. Mass | mDa  | PPM  | DBE  | i-FIT | Norm | Conf (%) | Formula          |
|-----------|------------|------|------|------|-------|------|----------|------------------|
| 1009.6505 | 1009.6507  | -0.2 | -0.2 | 20.5 | 151.0 | n/a  | n/a      | C60 H86 N6 O6 Na |

Figure S125. HRMS spectrum of 15x

### Chromatogram

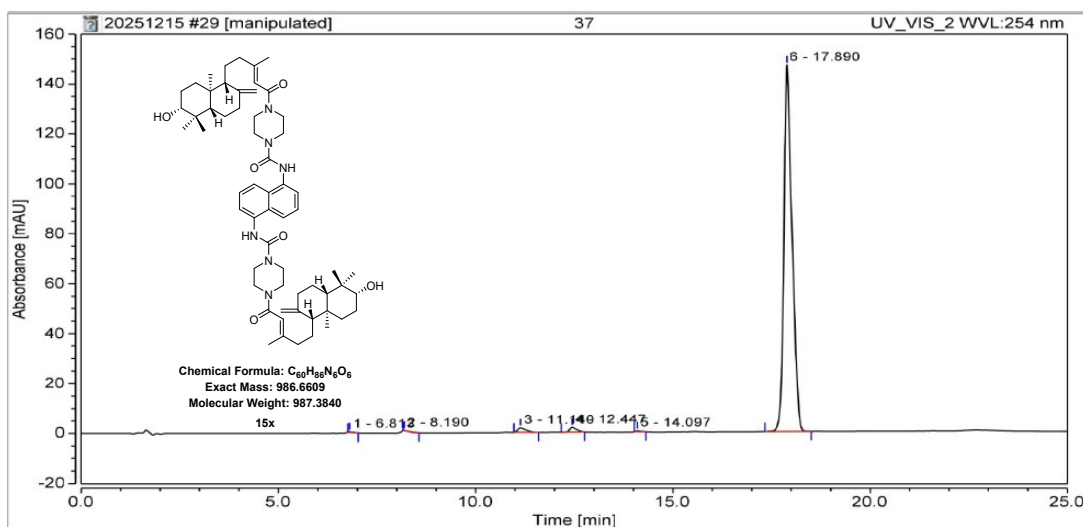

### Integration Results

| No.           | Peak Name | Retention Time min | Area mAU*min  | Height mAU     | Relative Area % | Relative Height % | Amount |
|---------------|-----------|--------------------|---------------|----------------|-----------------|-------------------|--------|
| 1             |           | 6.813              | 0.020         | 0.166          | 0.05            | 0.11              | n.a.   |
| 2             |           | 8.190              | 0.017         | 0.146          | 0.05            | 0.10              | n.a.   |
| 3             |           | 11.140             | 0.429         | 1.797          | 1.18            | 1.19              | n.a.   |
| 4             |           | 12.447             | 0.394         | 1.956          | 1.09            | 1.29              | n.a.   |
| 5             |           | 14.097             | 0.054         | 0.347          | 0.15            | 0.23              | n.a.   |
| 6             |           | 17.890             | 35.374        | 146.782        | 97.48           | 97.08             | n.a.   |
| <b>Total:</b> |           |                    | <b>36.288</b> | <b>151.194</b> | <b>100.00</b>   | <b>100.00</b>     |        |

Figure S126. HPLC spectrum of 15x
